# Supplementary material for: Does robotic-assisted unicompartmental knee arthroplasty have lower complication and revision rates than the conventional procedure? A systematic review and meta-analysis
Source: PubMed Central journal article supplement — BMJ Open. 2021 Aug 11;11(8):e044778. doi: 10.1136/bmjopen-2020-044778 (PMC8359483; doi:10.1136/bmjopen-2020-044778), 2021-08-11
Supplement: bmjopen-2020-044778.draft_revisions.pdf [file bmjopen-2020-044778.draft_revisions.pdf]

# BMJ Open

BMJ Open is committed to open peer review. As part of this commitment we make the peer review history of every article we publish publicly available.

When an article is published we post the peer reviewers' comments and the authors' responses online. We also post the versions of the paper that were used during peer review. These are the versions that the peer review comments apply to.

The versions of the paper that follow are the versions that were submitted during the peer review process. They are not the versions of record or the final published versions. They should not be cited or distributed as the published version of this manuscript.

BMJ Open is an open access journal and the full, final, typeset and author-corrected version of record of the manuscript is available on our site with no access controls, subscription charges or pay-per-view fees (<http://bmjopen.bmj.com>).

If you have any questions on BMJ Open's open peer review process please email [info.bmjopen@bmj.com](mailto:info.bmjopen@bmj.com)

# BMJ Open

## Fewer complications and lower revision rates with robotic-assisted unicompartmental knee arthroplasty

|                               |                                                                                                                                                                                                                                                                                                                                       |
|-------------------------------|---------------------------------------------------------------------------------------------------------------------------------------------------------------------------------------------------------------------------------------------------------------------------------------------------------------------------------------|
| Journal:                      | <i>BMJ Open</i>                                                                                                                                                                                                                                                                                                                       |
| Manuscript ID                 | bmjopen-2020-044778                                                                                                                                                                                                                                                                                                                   |
| Article Type:                 | Original research                                                                                                                                                                                                                                                                                                                     |
| Date Submitted by the Author: | 12-Sep-2020                                                                                                                                                                                                                                                                                                                           |
| Complete List of Authors:     | Sun, Yifeng; First Affiliated Hospital of Shandong First Medical University<br>Liu, Wei; First Affiliated Hospital of Shandong First Medical University<br>Hou, Jian<br>Hu, Xiuhua; First Affiliated Hospital of Shandong First Medical University<br>Zhang, Wenqiang; First Affiliated Hospital of Shandong First Medical University |
| Keywords:                     | Orthopaedic & trauma surgery < SURGERY, Adult surgery < SURGERY, Knee < ORTHOPAEDIC & TRAUMA SURGERY, Adult orthopaedics < ORTHOPAEDIC & TRAUMA SURGERY                                                                                                                                                                               |
|                               |                                                                                                                                                                                                                                                                                                                                       |

SCHOLARONE™  
Manuscripts

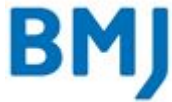

I, the Submitting Author has the right to grant and does grant on behalf of all authors of the Work (as defined in the below author licence), an exclusive licence and/or a non-exclusive licence for contributions from authors who are: i) UK Crown employees; ii) where BMJ has agreed a CC-BY licence shall apply, and/or iii) in accordance with the terms applicable for US Federal Government officers or employees acting as part of their official duties; on a worldwide, perpetual, irrevocable, royalty-free basis to BMJ Publishing Group Ltd ("BMJ") its licensees and where the relevant Journal is co-owned by BMJ to the co-owners of the Journal, to publish the Work in this journal and any other BMJ products and to exploit all rights, as set out in our [licence](#).

The Submitting Author accepts and understands that any supply made under these terms is made by BMJ to the Submitting Author unless you are acting as an employee on behalf of your employer or a postgraduate student of an affiliated institution which is paying any applicable article publishing charge ("APC") for Open Access articles. Where the Submitting Author wishes to make the Work available on an Open Access basis (and intends to pay the relevant APC), the terms of reuse of such Open Access shall be governed by a Creative Commons licence – details of these licences and which [Creative Commons](#) licence will apply to this Work are set out in our licence referred to above.

Other than as permitted in any relevant BMJ Author's Self Archiving Policies, I confirm this Work has not been accepted for publication elsewhere, is not being considered for publication elsewhere and does not duplicate material already published. I confirm all authors consent to publication of this Work and authorise the granting of this licence.

1  
2  
3  
4 **Fewer complications and lower revision rates with robotic- assisted**  
5  
6 **unicompartmental knee arthroplasty**  
7

8  
9 **A Systematic Review and Meta-Analysis**  
10

11 Yifeng Sun<sup>1</sup>, Wei Liu<sup>1</sup>, Jian Hou<sup>2</sup>, Xiuhua Hu<sup>1</sup>, Wenqiang Zhang<sup>1\*</sup>  
12

13 <sup>1</sup>Orthopaedics Department of The First Affiliated Hospital of Shandong First Medical University,  
14 Jingshi Road 16766, Jinan, Shandong 250014, PR China  
15

16  
17 <sup>2</sup>Jimo Traditional Chinese Hospital, Qingdao, Shandong 266200, PR China  
18

19 \*Correspondence and requests for materials should be addressed to Wenqiang Zhang  
20 ([qfszwq@sina.com](mailto:qfszwq@sina.com)).  
21  
22  
23  
24  
25  
26  
27  
28  
29  
30  
31  
32  
33  
34  
35  
36  
37  
38  
39  
40  
41  
42  
43  
44  
45  
46  
47  
48  
49  
50  
51  
52  
53  
54  
55  
56  
57  
58  
59  
60

## Abstract

**Objective:** We conducted a systematic review and meta-analysis of patients who had undergone UKA in order to compare complications, revision rate and non-device specific complications between robotic-assisted and conventional UKA.

**Design:** Systematic review and meta-analysis.

**Data sources:** PubMed, Embase, Web of Science, and Cochrane databases were searched up to 30 June 2020

**Eligibility criteria:** Case-control studies between robotic-assisted and conventional UKA

**Data extraction and synthesis:** Data from all eligible articles were independently extracted by two authors. We analysed the differences in outcomes between robotic-assisted and conventional UKA by calculating the corresponding 95% confidence interval (CI) and pooled relative risk (RR)]. Heterogeneity was assessed using chi-square and I-square tests. All the analyses were performed using the 'metafor' packages of the R 3.6.2 software

**Results:** We found that robotic-assisted UKA had less complications (RR: 0.51, 95% CI: 0.27-0.95, P=0.03) and lower revision rates (RR: 0.39, 95% CI: 0.19-0.81, P=0.01) than conventional UKA. We observed no significant differences in the non-device specific complications between two surgical techniques (RR: 0.83, 95% CI: 0.40-1.70, P=0.61). No publication bias was found in this meta-analysis.

**Conclusions:** We acknowledge that robotic-assisted UKA does show obviously better superiority than conventional UKA in controlling complications and revision rates.

### Strengths and limitations of this study

- ▶ We conducted a meta-analysis to find the best evidence to compare the robotic-arm assisted and manual Unicompartmental Knee Arthroplasty (UKA).
- ▶ All the included research was limited to English literature, so some related published studies in other languages that might meet the inclusion criteria might have been missed.
- ▶ The comparatively modest size of the sample can unavoidably increase the risk of bias.
- ▶ Our results were unadjusted for other factors that may influence knee function outcomes such as patient age and weight, the anterior cruciate ligament, soft tissue balance, composition and thickness of the polyethylene component, and so on

1  
2  
3  
4 **Keywords:** Unicompartmental knee arthroplasty; Robotic arm-assisted UKA; Conventional UKA;  
5  
6 Meta-analysis.

7 **Abbreviations:** Unicompartmental knee arthroplasty, UKA; Robotic arm-assisted UKA,  
8  
9 RAUKA; Conventional UKA;

## 11 **Introduction**

12  
13  
14 Unicompartmental knee arthroplasty (UKA) is often used for treating isolated compartmental  
15  
16 knee osteoarthritis because of the minimally invasive approach and the bone resection needed during  
17  
18 surgery. However, higher revision rates (10%–20%) have been reported in patients undergoing  
19  
20 UKA than in those with total knee arthroplasty<sup>1</sup>. Numerous reasons may account for the higher  
21  
22 failure rate including poor patient selection and component design, and some authors have attributed  
23  
24 it to malpositioning<sup>2</sup>. The robotic systems with promising short-term radiological outcomes of the  
25  
26 implants and precision in bone cuts during UKA has subsequently increased. Recently,  
27  
28 approximately 15–20% of robotic-assisted UKA surgeries have been developed to improve the  
29  
30 clinical efficacy<sup>3</sup>. Most scholars believed that the use of robotic-assisted UKA was associated with  
31  
32 a significantly better component angle alignment accuracy and functional outcomes and higher  
33  
34 satisfaction compared with conventional UKA, but the complication and revision rates in previous  
35  
36 studies varied greatly, making it difficult to estimate safety outcomes of the two surgical techniques<sup>4</sup>  
37  
38 <sup>5</sup>.

39  
40 Previous meta-analyses were performed to compare the effects and safety between the robotic-  
41  
42 assisted and conventional UKA. Fu et al. reported that the robotic-assisted system in UKA is unable  
43  
44 to decrease adverse events<sup>6</sup>, but Zhang et al. hold the opposite view that robotic-assisted UKA could  
45  
46 significantly reduce complication rate<sup>4</sup>, and the latest meta-analysis did not provide a definitive  
47  
48 answer regarding the complications<sup>5</sup>. Therefore, we conducted a systematic review and meta-  
49  
50 analysis of patients who had undergone UKA in order to compare complications, revision rate and  
51  
52 non-device specific complications between robotic-assisted and conventional UKA.

## 53 **Methods**

### 54 **Search strategy**

55  
56  
57 We searched PubMed, Web of Science, Embase and Cochrane databases using combinations  
58  
59 of the following keywords: ‘Unicompartmental Knee Arthroplasty’, ‘UKA’, ‘conventional UKA’,  
60

1  
2  
3  
4 'traditional UKA', 'manual UKA', 'robotic-assisted UKA', 'complications', 'adverse events' and  
5 'revision' (last updated on 30 June 2020). References of identified reports were also retrieved and  
6 reviewed for other possible related studies. All studies were carefully and repeatedly evaluated.  
7  
8 Study period, treatment information, the hospital, and any additional inclusion criteria were used to  
9  
10 define duplicate or overlapping data.  
11  
12

### 13 **Inclusion and exclusion criteria**

14  
15 Studies that met the following criteria were eligible for inclusion in this study: (1) original studies  
16 specified for unicompartmental knee arthroplasty; (2) comparison of robotic-assisted and  
17 conventional UKA; and (3) publication in English. Exclusion criteria were as follows: (1) the type  
18 of literature specified as a talk, review, digest, letter, commentary, digest or case report; (2) model-  
19 based or cadaver studies; (3) duplicate or overlapping data; and (4) not case-control studies.  
20  
21  
22  
23  
24

### 25 **Data extraction and quality assessment**

26  
27 Data from all the eligible articles were independently extracted by two authors, who also  
28 discussed any disagreements and arrived at a consensus. Data retrieved for each study included the  
29 first author's name, published year, original country, methods, number of patients, Follow-up time,  
30 complications, revision rate and non-device specific complications. Two reviewers used the  
31 Modified Newcastle-Ottawa Quality Assessment Scale (NOS) to evaluate the quality of the selected  
32 studies. Studies of superior quality were assigned a score of 9 stars, high quality studies a score  $\geq 6$   
33 stars, moderate quality studies a score between 3 and 5 stars and low quality studies a score  $< 3$ .  
34  
35  
36  
37  
38  
39  
40

### 41 **Statistical analysis**

42  
43 We analysed the differences in outcomes between robotic-assisted and conventional UKA by  
44 calculating the corresponding 95% confidence interval (CI) and pooled relative risk (RR)].  
45 Heterogeneity was assessed using chi-square and I-square tests. Fixed and random effect models  
46 were employed when there was no significant heterogeneity ( $I^2 \leq 50\%$ ,  $P > 0.10$ , fixed-effects model)  
47 or an obvious heterogeneity ( $I^2 > 50\%$ ,  $P < 0.10$ , random-effects model) among the included studies.  
48 Galbraith plots were used to detect the potential sources of heterogeneity<sup>8</sup>. Normal quantile-quantile  
49 (Q-Q) plots were used to check whether our data deviates from the confidence interval. Outlier and  
50 influence analyses were made by inspecting the plots for externally standardised residues, DFFITS  
51 values, Cook's distances, covariance ratios, estimates of  $\tau^2$  and test statistics for residual  
52 heterogeneity when each study is removed in turn, hat values and weights for each study included  
53  
54  
55  
56  
57  
58  
59  
60

1  
2  
3  
4 in the analysis<sup>9</sup>. Publication bias was assessed by inspection of a contour-enhanced funnel plot, with  
5 contours at the 90%, 95% and 99% confidence intervals. All the analyses were performed using the  
6 'metafor' packages of the R 3.6.2 software<sup>10</sup>. A 2-tailed  $p < 0.05$  was considered as statistically  
7 significant.  
8  
9  
10

## 11 **Results**

### 12 **Study characteristics**

13  
14  
15 We initially identified 312 studies via our search of the PubMed, Embase, Web of Science and  
16 CBM databases. Of these, 261 reports did not meet the inclusion criteria and were excluded  
17 following the review of the title and abstract. Of the 51 remaining studies that underwent a full-text  
18 review, 28 were excluded because they were not comparison trials. In addition, 8 full-text articles  
19 were excluded with the following reasons: (1) data were incomparable or incomplete and (2) have  
20 no complication results. Finally, 15 studies involving 37612 patients were included in the final meta-  
21 analysis. The study flow diagram is presented in Fig 1. Table 1 summarises the main characteristics  
22 of the 15 included studies. The quality assessment of the included studies is presented in detail in  
23 the supplementary material, and all the studies were evaluated as being of moderate-to-high quality  
24 (Table S1).  
25  
26  
27  
28  
29  
30  
31  
32  
33  
34  
35  
36  
37  
38  
39  
40  
41  
42  
43  
44  
45  
46  
47  
48  
49  
50  
51  
52  
53  
54  
55  
56  
57  
58  
59  
60



**Table 1. Main characteristics of all articles included in the meta-analysis (RA-UKA: Robotic-assisted UKA; CONV-UKA: Conventional UKA)**

| Order | Studys                                  | Year | Country | Design                  | No.keens<br>RA-UKA | Follow-up<br>(Month) | Complication | Revision | Function scoring system                  |
|-------|-----------------------------------------|------|---------|-------------------------|--------------------|----------------------|--------------|----------|------------------------------------------|
| 1     | Cobb <i>et al</i> <sup>11</sup>         | 2006 | UK      | RCT                     | 19                 | 4.5M                 | 1            | NULL     | AKSS, WOMAC                              |
|       |                                         |      |         |                         | 15                 |                      | 2            |          |                                          |
| 2     | Lonner <i>et al</i> <sup>3</sup>        | 2010 | USA     | PCT                     | 31                 | 3 M                  | 1            | NULL     | NULL                                     |
|       |                                         |      |         |                         | 27                 |                      | 0            |          |                                          |
| 3     | Hansen <i>et al</i> <sup>12</sup>       | 2014 | USA     | Case control            | 30                 | 24M                  | 7            | 0        | Recovery time First,<br>Ambulation       |
|       |                                         |      |         |                         | 32                 |                      | 3            |          |                                          |
| 4     | Maccallum<br><i>et al</i> <sup>13</sup> | 2016 | USA     | PCT                     | 87                 | 32.4M                | 3            | 3        | NULL                                     |
|       |                                         |      |         |                         | 177                |                      | 7            |          |                                          |
| 5     | Blyth <i>et al</i> <sup>14</sup>        | 2017 | UK      | RCT                     | 64                 | 12M                  | 1            | NULL     | AKSS, AKSS                               |
|       |                                         |      |         |                         | 65                 |                      | 1            |          |                                          |
| 6     | Gilmour <i>et al</i> <sup>15</sup>      | 2018 | UK      | RCT                     | 58                 | 24M                  | 0            | 0        | AKSS,OKS,FJS<br>Pain VAS                 |
|       |                                         |      |         |                         | 54                 |                      | 2            |          |                                          |
| 7     | Kayani <i>et al</i> <sup>16</sup>       | 2018 | UK      | PCT                     | 60                 | 1M                   | 0            | NULL     | NULL                                     |
|       |                                         |      |         |                         | 60                 |                      | 2            |          |                                          |
| 8     | Batailler <i>et al</i> <sup>17</sup>    | 2018 | France  | Case control            | 80                 | 19.7M                | 4            | 4        | IKSS                                     |
|       |                                         |      |         |                         | 80                 |                      | 7            |          |                                          |
| 9     | Canetti <i>et al</i> <sup>18</sup>      | 2018 | France  | Retrospective<br>cohort | 11                 | 39.3 M               | 0            | NULL     | IKSS                                     |
|       |                                         |      |         |                         | 17                 |                      | 1            |          |                                          |
| 10    | Banger <i>et al</i> <sup>19</sup>       | 2019 | UK      | RCT                     | 74                 | 60M                  | 0            | 0        | AKSS, JFS, Pain VAS,<br>Siffness VAS,OKS |
|       |                                         |      |         |                         | 65                 |                      | 6            |          |                                          |
| 11    | Wong <i>et al</i> <sup>20</sup>         | 2019 | USA     | Retrospective<br>cohort | 58                 | 3M                   | 7            | 7        | SF-12, WOMAC, KSFS                       |
|       |                                         |      |         |                         | 118                |                      | 7            |          |                                          |

|    |                                         |      |        |                                 |                  |         |             |             |                                                                 |
|----|-----------------------------------------|------|--------|---------------------------------|------------------|---------|-------------|-------------|-----------------------------------------------------------------|
| 12 | Christina <i>et al</i> <sup>21</sup>    | 2019 | USA    | Retrospective comparative study | 246<br>492       | 24M     | 2<br>26     | 2<br>26     | NULL                                                            |
| 13 | Kayani <i>et al</i> <sup>22</sup>       | 2019 | UK     | PCT                             | 73<br>73         | 3M      | 0<br>2      | NULL        | Pain scores, Opiate analgesia, Straight leg raise, Knee flexion |
| 14 | Rushabh <i>et al</i> <sup>23</sup>      | 2019 | USA    | Retrospective comparative study | 13,617<br>21,444 | 36<br>M | 125<br>1327 | 125<br>1327 | NULL                                                            |
| 15 | Mergenthaler <i>et al</i> <sup>24</sup> | 2020 | France | Case control                    | 200<br>191       | 24M     | 19<br>34    | 8<br>21     | KSS score                                                       |

### Complications

All the 15 studies reported data regarding complications, which mainly included prosthetic loosening, subsidence, dislocated polyethylene bearing, periprosthetic fracture, Knee ankylosis, wound complications, deep haematoma, infection, thrombosis, persistent pain and so on. The chi-square and I-square test results showed statistical heterogeneity among the included studies ( $p < 0.01$ ;  $I^2 = 73.4\%$ ), and Galbraith plots showed that no studies were found to cause heterogeneity (Fig. 2A). The plotted points laid close to a sloped straight line on the quantile-quantile (Q-Q) plot (Fig. 2B), which showed that there was no significant deviation from the confidence interval in our studies. Therefore, a random-effects model was used for the analysis. We found that robotic-assisted UKA had less complications than conventional UKA (RR: 0.51, 95% CI: 0.27-0.95,  $P = 0.03$ ; Fig. 2).

### Revision rate

Nine studies reported data regarding complications that required surgery between the two groups. The chi-square and I-square test results showed statistical heterogeneity among the included studies ( $p < 0.01$ ;  $I^2 = 74.1\%$ ), and Galbraith plots were used to determine the most heterogeneous studies, but no studies were removed (Fig. 3A). As seen from the Q-Q plot, there was no significant deviation from the confidence interval in our studies (Fig. 3B). Data pooled using a random-effects model indicated that robotic-assisted UKA had lower revision rates (RR: 0.39, 95% CI: 0.19-0.81,  $P = 0.01$ ; Fig. 3C).

### Non- device specific complications

Non-device specific complications were recorded in a total of 9 studies. The chi-square and I-square test results indicated statistical heterogeneity among the included studies ( $p = 0.39$ ;  $I^2 = 13.6\%$ ), and Galbraith plots (Fig. 4A) and quantile-quantile (Q-Q) plots (Fig. 4B) also showed that there was no statistical heterogeneity. We observed no significant differences in the Non-device specific complications between the 2 groups by using a fixed-effects model (RR: 0.83, 95% CI: 0.40-1.70,  $P = 0.61$ ; Fig. 4C).

### Publication bias

We assessed publication bias using Begg's test<sup>25</sup>. The contour-enhanced funnel plot for the meta-analysis of the complications for robotic-assisted versus conventional UKA was largely symmetric ( $P_{\text{Begg}} = 0.94$ ; Fig. 5A). Similar results were observed for the revision rate ( $P_{\text{Begg}} = 0.98$ ; Fig. 5B) and non-device specific complications ( $P_{\text{Begg}} = 0.32$ ; Fig. 5C).

### Outlier and influence analyses

The presence of outliers and influential cases may affect the validity and robustness of the conclusions from a meta-analysis. Figure 5 shows the standardised residuals (rstudent), DFFITS (dffits), Cook's distances (cook.d), covariance ratios (cov.r), estimates of  $\tau^2$  (tau2.del) and test statistics (QE.del) for this random-effects model that was used for the analysis of the complications (Fig. 6). Study 14 (Rushabh,2019) was identified as a potential outlier, and also appeared to be an influential case. Due to the fact that the study had as advantages the large sample size (35,061 patients, Robot =13,617; CONV =21,444), which makes it suitable to study national trends, and that the hat values and weights values showed that this study occupied the largest proportion in the meta-analysis, this study was not be removed, but the outlier was included in the meta-analysis. This is also the case in the analysis of the revision rate. No outlier was included in the analysis of Non-device specific complications.

### Discussion

For over fifty years, unicompartmental knee arthroplasty (UKA) has been used to treat isolated compartmental knee arthritis. Despite the many years of experience performing UKA, Some literatures still reported that UKA has higher failure rates compared to total knee arthroplasty (TKA)<sup>26</sup>. Complications that lead to failure can occur following UKA including bearing dislocation, aseptic loosening, polyethylene wear, periprosthetic fracture, progression of the arthritis to the contralateral compartment, infection, bone-implant impingement, retaining of cement debris in the joint, knee ankylosis, wound complications, deep haematoma, infection, thrombosis, persistent pain and other adverse events<sup>27-29</sup>. Newly designed robotic-assisted systems are believed to increase the precision and accuracy with which unicompartmental knee arthroplasty can be performed, possibly leading to fewer complications and lower revision rates<sup>30</sup>. Many publications have studied the complications of robotic-assisted UKA, but few are comparative studies on the complications of robotic-assisted UKA compared to conventional UKA. However, researchers have reported conflicting results regarding the complication rate between robotic-assisted and conventional UKA. Hansen et al. [13] and Blyth et al. [4] did not find a significant difference in terms of complications between robotic-assisted UKA and conventional UKA. Wong et al.<sup>20</sup> found that the RAA cohort had a higher early revision rate than the CONV group, while others hold the view that robotic-

1  
2  
3  
4 assisted UKA has fewer complications and lower revision rates than conventional UKA. It is  
5 important to assess the complications of this new technology before its widespread use<sup>21</sup>. Therefore,  
6 we conducted a systematic review and meta-analysis to compare the complication rates, revision  
7 rate and non-device specific complications between robotic-assisted and conventional UKA. The  
8 main finding of our meta-analysis is that robotic-assisted UKA has fewer complications and lower  
9 revision rates than conventional UKA, but no significant differences in the non-device specific  
10 complications. Thus, we acknowledge that robotic-assisted UKA does show obviously better  
11 superiority than conventional UKA in controlling complications and revision rates.

12  
13  
14  
15  
16  
17  
18  
19 Many publications have explored the relationship between the component position and its  
20 impact on implant survival and patient satisfaction<sup>31 32</sup>. Some authors believe that a reduction in the  
21 alignment errors of these component will ultimately have an impact on implant function or survival.  
22 Some studies confirmed that the proportion of patients with tibial and femoral component  
23 implantation within 2° of the target position was significantly greater in the group that underwent  
24 robotic-assisted UKA, resulting in better long-term clinical scores and a lower implant failure rate<sup>13</sup>  
25  
26  
27  
28  
29  
30  
31  
32  
33  
34  
35  
36  
37  
38  
39  
40  
41  
42  
43  
44  
45  
46  
47  
48  
49  
50  
51  
52  
53  
54  
55  
56  
57  
58  
59  
60  
Therefore, it could be shown that the use of robotic-assisted system in UKA is able to reduce  
the implantation errors, which may be the reason why robotic-assisted UKA had fewer  
complications and lower revision rates than conventional UKA.

Non- device specific complications were recorded in a total of 9 studies, which mainly included  
infection, knee ankylosis, wound complications, deep haematoma, infection, thrombosis, persistent  
pain in our meta-analysis. While these adverse events are likely to be related to the procedure, fewer  
were considered to be directly related to the comparative study itself<sup>11</sup>. Mergenthaler reported that  
there was no complication due to the use of the robotic system<sup>24</sup>. Andrew believes that no further  
rigid fixation device is necessary, which reduces potential complications such as infection,  
iatrogenic fractures, or soft tissue injury, because of the robot's weight and movement<sup>35</sup>. However,  
there were no significant differences in the non- device specific complications in our meta-analysis.  
Therefore, no evidence suggested that the use of robotic-assisted UKA may add the non-device  
specific complications to this procedure.

There are several limitations to this meta-analysis. Firstly, there is a possibility of publication  
bias. All the included studies were limited to the English literature; therefore, some related published  
studies in other languages that might have met the inclusion criteria might have been missed.

1  
2  
3  
4 Besides, we tried to identify and retrieve all additional unpublished information, but some missing  
5 data were inevitable. In addition, our results were unadjusted for other factors that may influence  
6 complication outcomes such as patient age and weight, the anterior cruciate ligament, soft tissue  
7 balance, composition and thickness of the polyethylene component and so on. Finally, given that  
8 there is no acknowledged functional scoring system for measuring postoperative function and due  
9 to the limited number of exact P-values, we did not evaluate the functional outcome in our meta-  
10 analysis (Table 1). Therefore, it is necessary to establish a universal system for assessing the  
11 postoperative function in patients with UKA.  
12  
13  
14  
15  
16  
17  
18

## 19 **Conclusions**

20  
21 In summary, data from this meta-analysis indicate that robotic-assisted UKA is associated with  
22 fewer complications and lower revision rates than conventional UKA. No evidence suggested that  
23 the use of robotic-assisted UKA may add the non-device specific complications to this procedure.  
24 Therefore, robotic-assisted UKA does have obviously better survivorship than conventional UKA.  
25 More large-scale studies aimed at establishing a universal standard for evaluating the efficacy of  
26 both treatments in this patient population are needed in the future.  
27  
28  
29  
30  
31  
32  
33

## 34 **Acknowledgments**

35  
36 We gratefully appreciate Shandong First Medical University for providing the statistical and  
37 technical assistance. Yi-Feng Sun conceived the study and wrote the manuscript, Wen-Qiang Zang  
38 analyzed the data, and Wei Liu generated data. All authors reviewed the manuscript.  
39  
40  
41

## 42 **Funding sources**

43  
44 This work was supported by the Natural Science Foundation of China (81702667) and Wu Jieping  
45 Medical Foundation (320.6750.18466), and Shandong Provincial Key Research and Development  
46 Project (GG201809250496).  
47  
48  
49

## 50 **Declaration of interest**

51  
52 The authors declare they have no conflict of interest.  
53  
54

## 55 **References**

- 56  
57 1. outcome And Reproducibility Of Data Concerning The Oxford Medial Unicompartmental Knee  
58 Arthroplasty. *Orthopaedic Proceedings*; 2011. The British Editorial Society of Bone & Joint  
59 Surgery.  
60

- 1
  - 2
  - 3
  - 4
  - 5
  - 6
  - 7
  - 8
  - 9
  - 10
  - 11
  - 12
  - 13
  - 14
  - 15
  - 16
  - 17
  - 18
  - 19
  - 20
  - 21
  - 22
  - 23
  - 24
  - 25
  - 26
  - 27
  - 28
  - 29
  - 30
  - 31
  - 32
  - 33
  - 34
  - 35
  - 36
  - 37
  - 38
  - 39
  - 40
  - 41
  - 42
  - 43
  - 44
  - 45
  - 46
  - 47
  - 48
  - 49
  - 50
  - 51
  - 52
  - 53
  - 54
  - 55
  - 56
  - 57
  - 58
  - 59
  - 60
2. Lang J, Mannava S, Floyd A, et al. Robotic systems in orthopaedic surgery. *The Journal of bone and joint surgery British volume* 2011;93(10):1296-99.
3. Lonner JH, Moretti VM. The Evolution of Image-Free Robotic Assistance in Unicompartamental Knee Arthroplasty. *American journal of orthopedics* 2016;45(4):249-54.
4. Zhang F, Li H, Ba Z, et al. Robotic arm-assisted vs conventional unicompartamental knee arthroplasty: A meta-analysis of the effects on clinical outcomes. *Medicine* 2019;98(35)
5. Chin BZ, Tan SSH, Chua KCX, et al. Robot-Assisted versus Conventional Total and Unicompartamental Knee Arthroplasty: A Meta-analysis of Radiological and Functional Outcomes. *Journal of Knee Surgery* 2020
6. Fu J, Wang Y, Li X, et al. Robot-assisted vs. conventional unicompartamental knee arthroplasty : Systematic review and meta-analysis. *Orthopade* 2018;47(12):1009-17.
7. Zhang W, Sun J, Liu C, et al. Comparing the Intramedullary Nail and Extramedullary Fixation in Treatment of Unstable Intertrochanteric Fractures. *Scientific Reports* 2018;8(1):2321-21.
8. Galbraith RF. Some Applications of Radial Plots. *Journal of the American Statistical Association* 1994;89(428):1232-42.
9. Viechtbauer W, Cheung MWL. Outlier and influence diagnostics for meta-analysis. *Research Synthesis Methods* 2010;1(2):112-25.
10. Viechtbauer W. Conducting Meta-Analyses in R with the metafor Package. *Journal of Statistical Software* 2010;36(3):1-48.
11. Cobb J, Henckel J, Gomes P, et al. Hands-on robotic unicompartamental knee replacement - A prospective, randomised controlled study of the Acrobot system. *Journal of Bone and Joint Surgery-british Volume* 2006;88(2):188-97.
12. Hansen DC, Kusuma SK, Palmer RM, et al. Robotic Guidance Does Not Improve Component Position or Short-Term Outcome in Medial Unicompartamental Knee Arthroplasty. *Journal of Arthroplasty* 2014;29(9):1784-89.
13. Maccallum KP, Danoff JR, Geller JA. Tibial baseplate positioning in robotic-assisted and conventional unicompartamental knee arthroplasty. *European Journal of Orthopaedic Surgery and Traumatology* 2016;26(1):93-98.
14. Blyth M, Anthony I, Rowe P, et al. Robotic arm-assisted versus conventional unicompartamental knee arthroplasty: Exploratory secondary analysis of a randomised controlled trial. *Bone and Joint Research* 2017;6(11):631-39.
15. Gilmour A, Maclean A, Rowe P, et al. Robotic-Arm Assisted Versus Conventional Unicompartamental Knee Arthroplasty. The 2 year Clinical outcomes of a Randomised Controlled Trial. *Journal of Arthroplasty* 2018:S0883540318301980.
16. Kayani, Konan, T JR, et al. The learning curve associated with robotic-arm assisted unicompartamental knee arthroplasty. *Bone & Joint Journal* 2018
17. Batailler C, White N, Ranaldi FM, et al. Improved implant position and lower revision rate with robotic-assisted unicompartamental knee arthroplasty. *Knee surgery, sports traumatology, arthroscopy : official journal of the ESSKA* 2019;27(4):1232-40. doi: 10.1007/s00167-018-5081-5 [published Online First: 2018/08/02]
18. Canetti R, Batailler C, Bankhead C, et al. Faster return to sport after robotic-assisted lateral unicompartamental knee arthroplasty: a comparative study. *Archives of Orthopaedic and Trauma Surgery* 2018;138(12):1765-71.
19. Banger M, Blyth M, Jones B, et al. 5 Year Results Of A Randomised Trial Of Robotic Arm Assisted Vs

- 1  
2  
3 Manual Unicompartmental Knee Arthroplasty.
- 4  
5 20. Wong J, Murtaugh T, Lakra A, et al. Robotic-assisted unicompartmental knee replacement offers no  
6 early advantage over conventional unicompartmental knee replacement. *Knee Surgery, Sports*  
7 *Traumatology, Arthroscopy* 2019;27(7):2303-08.
- 8  
9 21. Cool CL, Needham K, Khlopas A, et al. Revision Analysis of Robotic Arm-Assisted and Manual  
10 Unicompartmental Knee Arthroplasty. *Journal of Arthroplasty* 2019;34(5):926-31.
- 11  
12 22. Kayani B, Konan S, Tahmassebi J, et al. An assessment of early functional rehabilitation and hospital  
13 discharge in conventional versus robotic-arm assisted unicompartmental knee arthroplasty.  
14 *Journal of Bone and Joint Surgery-british Volume* 2019(1):24-33.
- 15  
16 23. Citak M, Suero EM, Citak M, et al. Unicompartmental knee arthroplasty: is robotic technology more  
17 accurate than conventional technique? *Knee* 2013;20(4):268-71.
- 18  
19 24. Mergenthaler G, Batailler C, Lording T, et al. Is robotic-assisted unicompartmental knee arthroplasty  
20 a safe procedure? A case control study. *Knee surgery, sports traumatology, arthroscopy :*  
21 *official journal of the ESSKA* 2020 doi: 10.1007/s00167-020-06051-z [published Online First:  
22 2020/05/12]
- 23  
24 25. Macaskill P, Walter SD, Irwig L. A comparison of methods to detect publication bias in meta -  
25 analysis. *Statistics in medicine* 2001;20(4):641-54.
- 26  
27 26. Sun X, Su Z. A meta-analysis of unicompartmental knee arthroplasty revised to total knee  
28 arthroplasty versus primary total knee arthroplasty. *Journal of Orthopaedic Surgery and*  
29 *Research* 2018;13(1):158.
- 30  
31 27. Epinette JA, Brunschweiler B, Mertl P, et al. Unicompartmental knee arthroplasty modes of failure:  
32 Wear is not the main reason for failure: A multicentre study of 418 failed knees. *Orthopaedics*  
33 *& Traumatology-surgery & Research* 2012;98(6)
- 34  
35 28. Kim KT, Lee S, Lee JI, et al. Analysis and Treatment of Complications after Unicompartmental Knee  
36 Arthroplasty. *Knee Surgery and Related Research* 2016;28(1):46-54.
- 37  
38 29. Qidon Z. Analysis of early and mid-term complications in unicompartmental knee arthroplasty.  
39 *Chinese Journal of Joint Surgery* 2013
- 40  
41 30. Roche MW. Robotic-assisted unicompartmental knee arthroplasty: the MAKO experience. *Clinics in*  
42 *Sports Medicine* 2014;33(1):123-32.
- 43  
44 31. Gromov K, Korchi M, Thomsen MG, et al. What is the optimal alignment of the tibial and femoral  
45 components in knee arthroplasty? An overview of the literature. *Acta orthopaedica*  
46 2014;85(5):480-87.
- 47  
48 32. Vandekerckhove P-J, Lanting B, Bellemans J, et al. The current role of coronal plane alignment in  
49 total knee arthroplasty in a preoperative varus aligned population: an evidence based review.  
50 *Acta Orthop Belg* 2016;82(1):129-42.
- 51  
52 33. Gromov K, Korchi M, Thomsen MG, et al. What is the optimal alignment of the tibial and femoral  
53 components in knee arthroplasty. *Acta Orthopaedica* 2014;85(5):480-87.
- 54  
55 34. Chatellard R, Sauleau V, Colmar M, et al. Medial unicompartmental knee arthroplasty: Does tibial  
56 component position influence clinical outcomes and arthroplasty survival? *Orthopaedics &*  
57 *Traumatology-surgery & Research* 2013;99(4)
- 58  
59 35. Pearle AD, Oloughlin PF, Kendoff D. Robot-Assisted Unicompartmental Knee Arthroplasty. *Journal*  
60 *of Arthroplasty* 2010;25(2):230-37.



## Figure legends

Figure 1. Flow diagram depicting the study selection procedure.

Figure 2. (A) Galbraith plot, (B) Quantile-Quantile (Q-Q) plot, and (C) Forest plot for the meta-analysis of complications between robotic-assisted and conventional unicompartmental knee arthroplasty.

Figure 3. (A) Galbraith plot, (B) Quantile-Quantile (Q-Q) plot, and (C) Forest plot for the meta-analysis of revision rate between robotic-assisted and conventional unicompartmental knee arthroplasty.

Figure 4. (A) Galbraith plot, (B) Quantile-Quantile (Q-Q) plot, and (C) Forest plot for the meta-analysis of non-device specific complications between robotic-assisted and conventional unicompartmental knee arthroplasty.

Figure 5. Contour-enhanced funnel plots of the included studies showing no evidence of publication bias in complications (A), revision rate (B) and non-device specific complications (C).

Figure 6. Outlier and influence analyses. The standardised residuals (rstudent), DFFITS (dffits), Cook's distances (cook.d), covariance ratios (cov.r), estimates of  $\tau^2$  (tau2.del) and test statistics (QE.del) for this random-effects model that was used for the analysis of the complications.

## Table

Table 1. Main characteristics of all articles included in the meta-analysis

Table S1. Assessment of the studies' qualities using the Newcastle-Ottawa Scale.

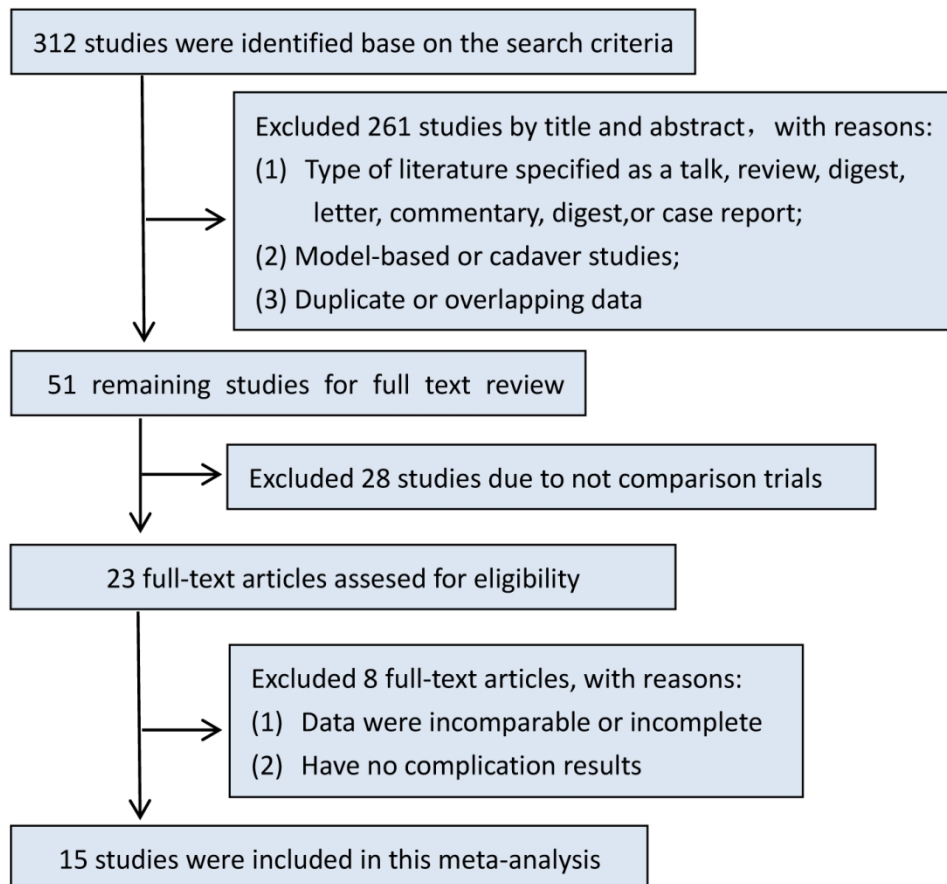

Figure 1. Flow diagram depicting the study selection procedure.

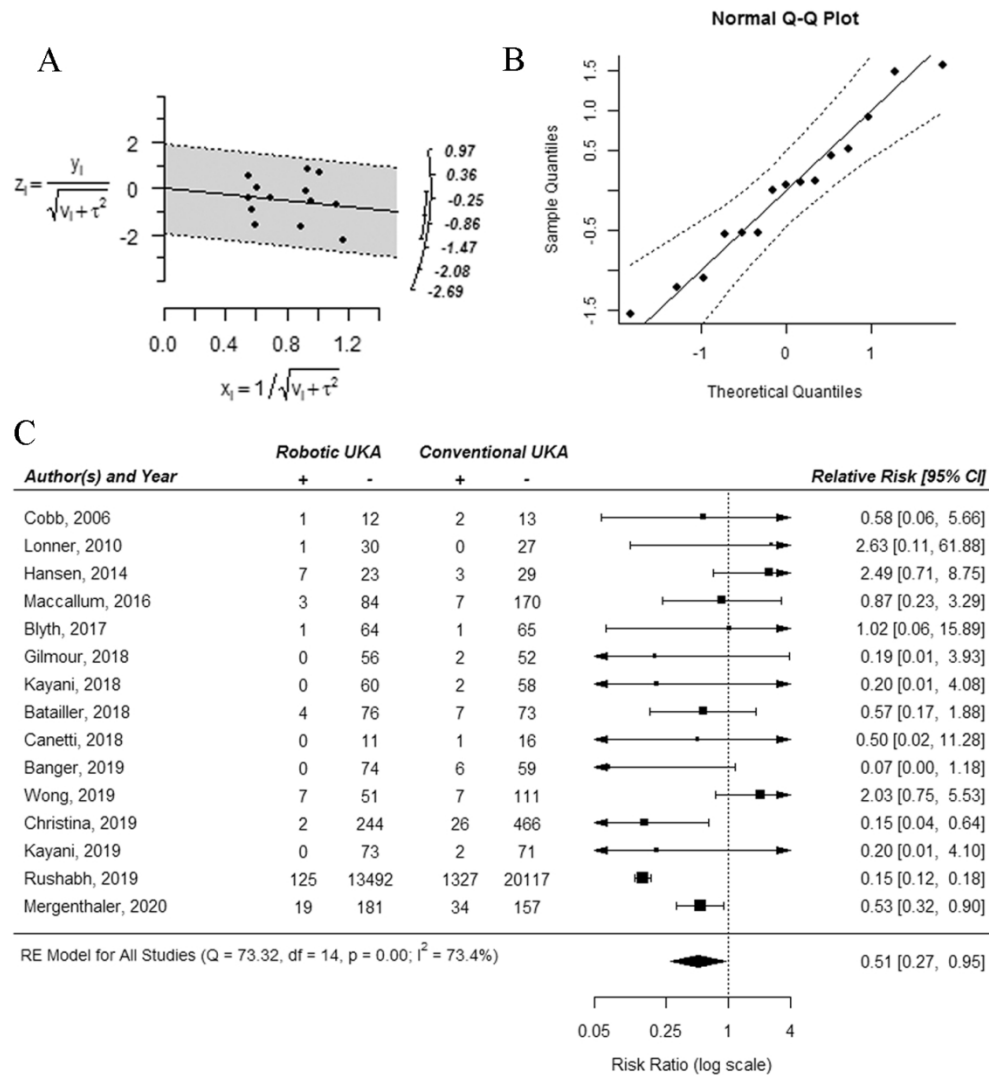

Figure 2. (A) Galbraith plot, (B) Quantile-Quantile (Q-Q) plot, and (C) Forest plot for the meta-analysis of complications between robotic-assisted and conventional unicompartmental knee arthroplasty.

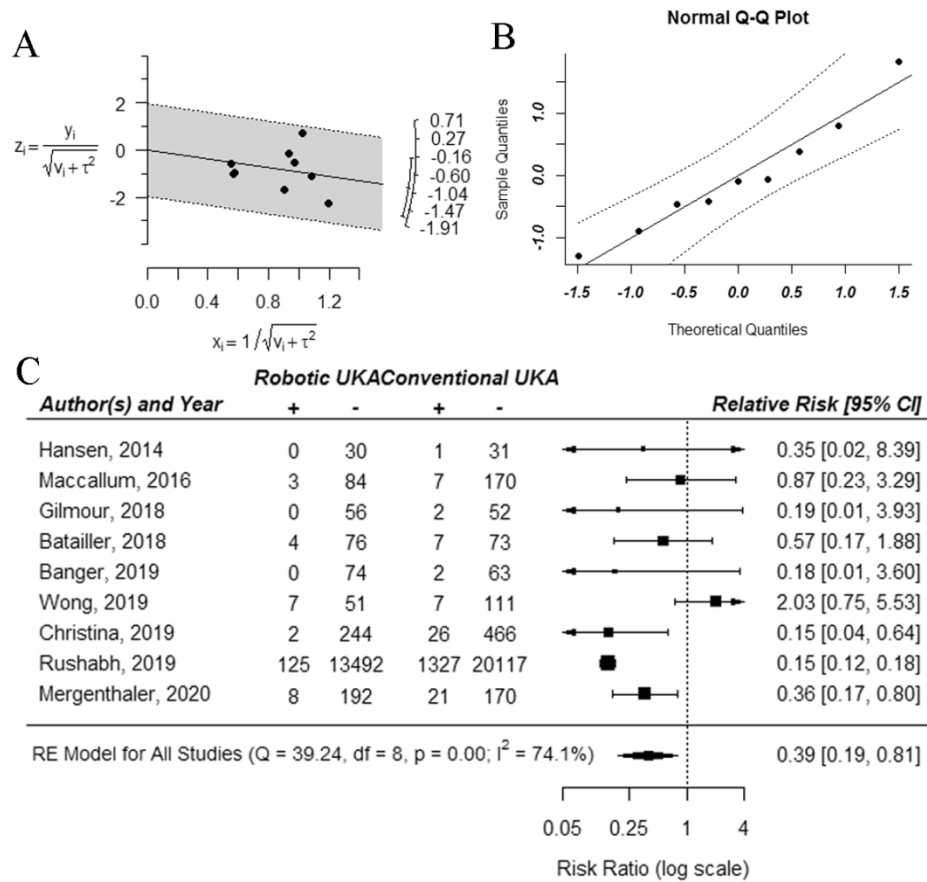

Figure 3. (A) Galbraith plot, (B) Quantile-Quantile (Q-Q) plot, and (C) Forest plot for the meta-analysis of revision rate between robotic-assisted and conventional unicompartmental knee arthroplasty.

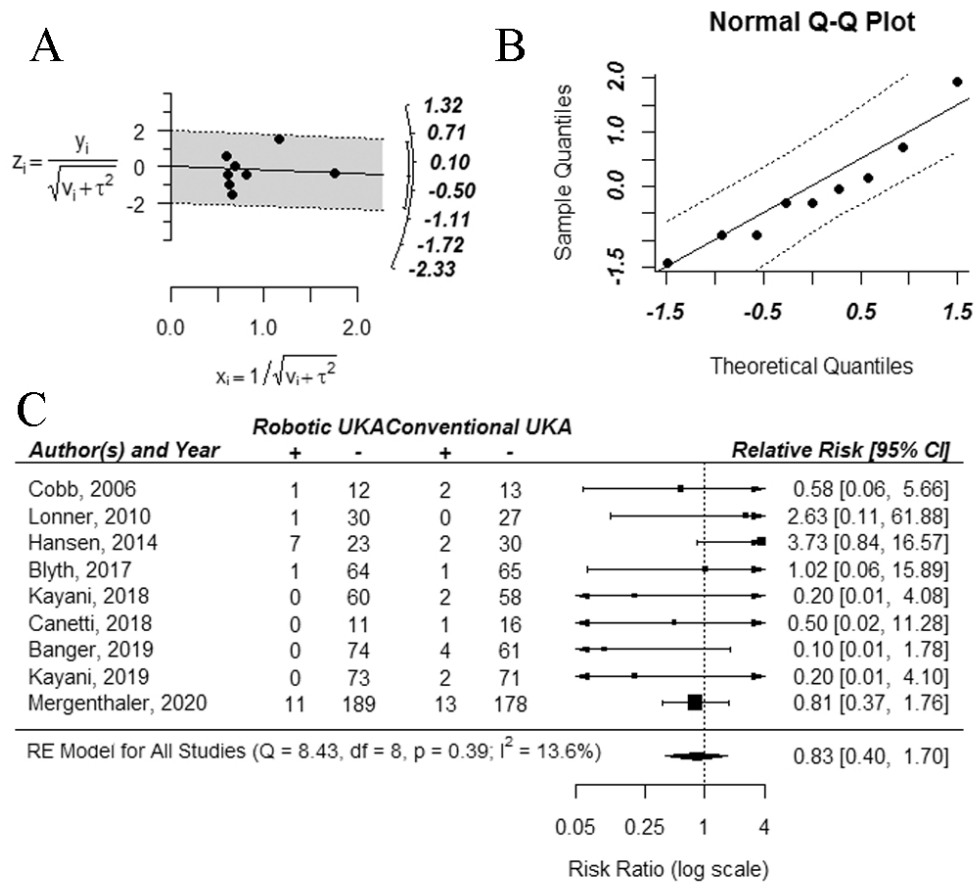

Figure 4. (A) Galbraith plot, (B) Quantile-Quantile (Q-Q) plot, and (C) Forest plot for the meta-analysis of non-device specific complications between robotic-assisted and conventional unicompartmental knee arthroplasty.

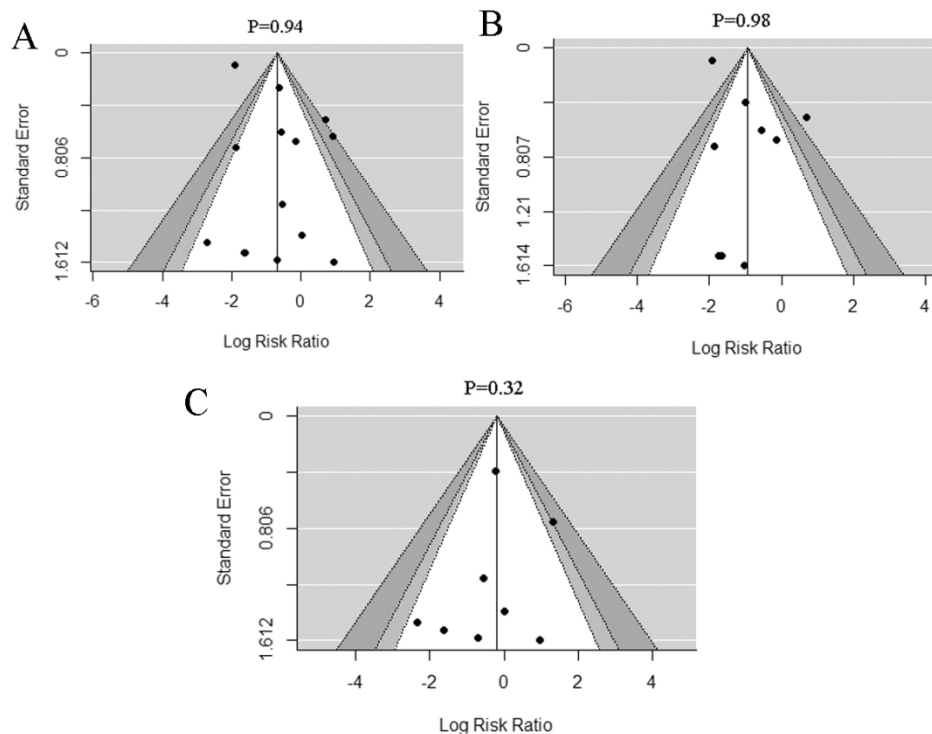

Figure 5. Contour-enhanced funnel plots of the included studies showing no evidence of publication bias in complications (A), revision rate (B) and non-device specific complications (C).

110x85mm (300 x 300 DPI)

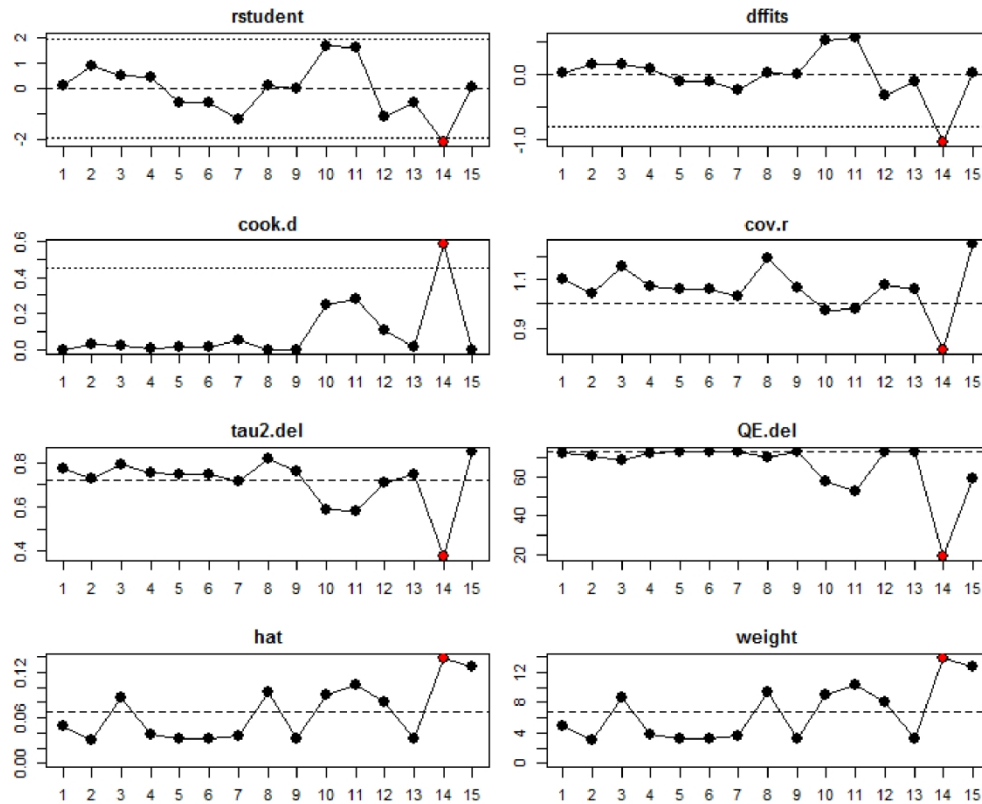

Figure 6. Outlier and influence analyses. The standardised residuals (rstudent), DFFITS (dffits), Cook's distances (cook.d), covariance ratios (cov.r), estimates of  $\tau^2$  (tau2.del) and test statistics (QE.del) for this random-effects model that was used for the analysis of the complications.

187x154mm (300 x 300 DPI)

**Table S1. Assessment of the studies' qualities using the Newcastle-Ottawa Scale.**

| Order | Study                     | Year | Country | Selection | Comparability | Exposure | Quality Score |
|-------|---------------------------|------|---------|-----------|---------------|----------|---------------|
| 2     | Cobb <i>et al</i>         | 2006 | UK      | ★★★★      | ★★            | ★★       | ★★★★★★★★      |
| 3     | Lonner <i>et al</i>       | 2010 | USA     | ★★★       | ★★            | ★        | ★★★★★★        |
| 15    | Hansen <i>et al</i>       | 2014 | USA     | ★★★       | ★             | ★        | ★★★★★         |
| 6     | Maccallum <i>et al</i>    | 2016 | USA     | ★★★       | ★★            | ★        | ★★★★★★        |
| 7     | Blyth <i>et al</i>        | 2017 | UK      | ★★★★      | ★★            | ★★       | ★★★★★★★★      |
| 8     | Gilmour <i>et al</i>      | 2018 | UK      | ★★★★      | ★★            | ★★       | ★★★★★★★★      |
| 11    | Kayani <i>et al</i>       | 2018 | UK      | ★★★       | ★★            | ★        | ★★★★★★        |
| 13    | Batailler <i>et al</i>    | 2018 | France  | ★★★       | ★             | ★        | ★★★★★         |
| 14    | Canetti <i>et al</i>      | 2018 | France  | ★★★       | ★             | ★        | ★★★★★         |
| 12    | Banger <i>et al</i>       | 2019 | UK      | ★★        | ★★            | ★★       | ★★★★★★        |
| 17    | Wong <i>et al</i>         | 2019 | USA     | ★★★       | ★             | ★        | ★★★★★         |
| 19    | Christina <i>et al</i>    | 2019 | USA     | ★★★       | ★             | ★        | ★★★★★         |
| 20    | Kayani <i>et al</i>       | 2019 | UK      | ★★★       | ★★            | ★        | ★★★★★★        |
| 21    | Rushabh <i>et al</i>      | 2019 | USA     | ★★★       | ★             | ★        | ★★★★★         |
| 23    | Mergenthaler <i>et al</i> | 2020 | France  | ★★★       | ★             | ★        | ★★★★★         |



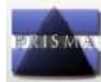

# PRISMA 2009 Checklist

| Section/topic                      | #  | Checklist item                                                                                                                                                                                                                                                                                              | Reported on page # |
|------------------------------------|----|-------------------------------------------------------------------------------------------------------------------------------------------------------------------------------------------------------------------------------------------------------------------------------------------------------------|--------------------|
| <b>TITLE</b>                       |    | <b>Fewer complications and lower revision rates with robotic- assisted unicompartmental knee arthroplasty</b><br>A Systematic Review and Meta-Analysis                                                                                                                                                      | 1                  |
| Title                              | 1  | Identify the report as a systematic review, meta-analysis, or both.                                                                                                                                                                                                                                         | 1                  |
| <b>ABSTRACT</b>                    |    |                                                                                                                                                                                                                                                                                                             |                    |
| Structured summary                 | 2  | Provide a structured summary including, as applicable: background; objectives; data sources; study eligibility criteria, participants, and interventions; study appraisal and synthesis methods; results; limitations; conclusions and implications of key findings; systematic review registration number. | 2                  |
| <b>INTRODUCTION</b>                |    |                                                                                                                                                                                                                                                                                                             |                    |
| Rationale                          | 3  | Describe the rationale for the review in the context of what is already known.                                                                                                                                                                                                                              | 3                  |
| Objectives                         | 4  | Provide an explicit statement of questions being addressed with reference to participants, interventions, comparisons, outcomes, and study design (PICOS).                                                                                                                                                  | 3                  |
| <b>METHODS</b>                     |    |                                                                                                                                                                                                                                                                                                             |                    |
| Protocol and registration          | 5  | Indicate if a review protocol exists, if and where it can be accessed (e.g., Web address), and, if available, provide registration information including registration number.                                                                                                                               | Not exist          |
| Eligibility criteria               | 6  | Specify study characteristics (e.g., PICOS, length of follow-up) and report characteristics (e.g., years considered, language, publication status) used as criteria for eligibility, giving rationale.                                                                                                      | 4                  |
| Information sources                | 7  | Describe all information sources (e.g., databases with dates of coverage, contact with study authors to identify additional studies) in the search and date last searched.                                                                                                                                  | 3-4                |
| Search                             | 8  | Present full electronic search strategy for at least one database, including any limits used, such that it could be repeated.                                                                                                                                                                               | 3                  |
| Study selection                    | 9  | State the process for selecting studies (i.e., screening, eligibility, included in systematic review, and, if applicable, included in the meta-analysis).                                                                                                                                                   | 4                  |
| Data collection process            | 10 | Describe method of data extraction from reports (e.g., piloted forms, independently, in duplicate) and any processes for obtaining and confirming data from investigators.                                                                                                                                  | 4                  |
| Data items                         | 11 | List and define all variables for which data were sought (e.g., PICOS, funding sources) and any assumptions and simplifications made.                                                                                                                                                                       | 4                  |
| Risk of bias in individual studies | 12 | Describe methods used for assessing risk of bias of individual studies (including specification of whether this was done at the study or outcome level), and how this information is to be used in any data synthesis.                                                                                      | 4                  |
| Summary measures                   | 13 | State the principal summary measures (e.g., risk ratio, difference in means).                                                                                                                                                                                                                               | 4                  |
| Synthesis of results               | 14 | Describe the methods of handling data and combining results of studies, if done, including measures of consistency (e.g., I <sup>2</sup> ) for each meta-analysis.                                                                                                                                          | 4                  |

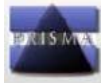

# PRISMA 2009 Checklist

Page 1 of 2

| Section/topic                 | #  | Checklist item                                                                                                                                                                                           | Reported on page # |
|-------------------------------|----|----------------------------------------------------------------------------------------------------------------------------------------------------------------------------------------------------------|--------------------|
| Risk of bias across studies   | 15 | Specify any assessment of risk of bias that may affect the cumulative evidence (e.g., publication bias, selective reporting within studies).                                                             | 4                  |
| Additional analyses           | 16 | Describe methods of additional analyses (e.g., sensitivity or subgroup analyses, meta-regression), if done, indicating which were pre-specified.                                                         | Not done           |
| <b>RESULTS</b>                |    |                                                                                                                                                                                                          |                    |
| Study selection               | 17 | Give numbers of studies screened, assessed for eligibility, and included in the review, with reasons for exclusions at each stage, ideally with a flow diagram.                                          | 5                  |
| Study characteristics         | 18 | For each study, present characteristics for which data were extracted (e.g., study size, PICOS, follow-up period) and provide the citations.                                                             | 5                  |
| Risk of bias within studies   | 19 | Present data on risk of bias of each study and, if available, any outcome level assessment (see item 12).                                                                                                | 5                  |
| Results of individual studies | 20 | For all outcomes considered (benefits or harms), present, for each study: (a) simple summary data for each intervention group (b) effect estimates and confidence intervals, ideally with a forest plot. | 8                  |
| Synthesis of results          | 21 | Present results of each meta-analysis done, including confidence intervals and measures of consistency.                                                                                                  | 8                  |
| Risk of bias across studies   | 22 | Present results of any assessment of risk of bias across studies (see Item 15).                                                                                                                          | 8                  |
| Additional analysis           | 23 | Give results of additional analyses, if done (e.g., sensitivity or subgroup analyses, meta-regression [see Item 16]).                                                                                    | 9                  |
| <b>DISCUSSION</b>             |    |                                                                                                                                                                                                          |                    |
| Summary of evidence           | 24 | Summarize the main findings including the strength of evidence for each main outcome; consider their relevance to key groups (e.g., healthcare providers, users, and policy makers).                     | 9-10               |
| Limitations                   | 25 | Discuss limitations at study and outcome level (e.g., risk of bias), and at review-level (e.g., incomplete retrieval of identified research, reporting bias).                                            | 10-11              |
| Conclusions                   | 26 | Provide a general interpretation of the results in the context of other evidence, and implications for future research.                                                                                  | 11                 |
| <b>FUNDING</b>                |    |                                                                                                                                                                                                          |                    |
| Funding                       | 27 | Describe sources of funding for the systematic review and other support (e.g., supply of data); role of funders for the systematic review.                                                               | 11                 |

From: Moher D, Liberati A, Tetzlaff J, Altman DG, The PRISMA Group (2009). Preferred Reporting Items for Systematic Reviews and Meta-Analyses: The PRISMA Statement. PLoS Med 6(7): e1000097. doi:10.1371/journal.pmed1000097

For more information, visit: [www.prisma-statement.org](http://www.prisma-statement.org).

# BMJ Open

## Does robotic- assisted unicompartmental knee arthroplasty have lower complication and revision rates than the conventional procedure? A Systematic Review and Meta-Analysis

|                                 |                                                                                                                                                                                                                                                                                                                                       |
|---------------------------------|---------------------------------------------------------------------------------------------------------------------------------------------------------------------------------------------------------------------------------------------------------------------------------------------------------------------------------------|
| Journal:                        | <i>BMJ Open</i>                                                                                                                                                                                                                                                                                                                       |
| Manuscript ID                   | bmjopen-2020-044778.R1                                                                                                                                                                                                                                                                                                                |
| Article Type:                   | Original research                                                                                                                                                                                                                                                                                                                     |
| Date Submitted by the Author:   | 05-May-2021                                                                                                                                                                                                                                                                                                                           |
| Complete List of Authors:       | Sun, Yifeng; First Affiliated Hospital of Shandong First Medical University<br>Liu, Wei; First Affiliated Hospital of Shandong First Medical University<br>Hou, Jian<br>Hu, Xiuhua; First Affiliated Hospital of Shandong First Medical University<br>Zhang, Wenqiang; First Affiliated Hospital of Shandong First Medical University |
| <b>Primary Subject Heading</b>: | Surgery                                                                                                                                                                                                                                                                                                                               |
| Secondary Subject Heading:      | Surgery                                                                                                                                                                                                                                                                                                                               |
| Keywords:                       | Orthopaedic & trauma surgery < SURGERY, Adult surgery < SURGERY, Knee < ORTHOPAEDIC & TRAUMA SURGERY, Adult orthopaedics < ORTHOPAEDIC & TRAUMA SURGERY                                                                                                                                                                               |
|                                 |                                                                                                                                                                                                                                                                                                                                       |

SCHOLARONE™  
Manuscripts



I, the Submitting Author has the right to grant and does grant on behalf of all authors of the Work (as defined in the below author licence), an exclusive licence and/or a non-exclusive licence for contributions from authors who are: i) UK Crown employees; ii) where BMJ has agreed a CC-BY licence shall apply, and/or iii) in accordance with the terms applicable for US Federal Government officers or employees acting as part of their official duties; on a worldwide, perpetual, irrevocable, royalty-free basis to BMJ Publishing Group Ltd ("BMJ") its licensees and where the relevant Journal is co-owned by BMJ to the co-owners of the Journal, to publish the Work in this journal and any other BMJ products and to exploit all rights, as set out in our [licence](#).

The Submitting Author accepts and understands that any supply made under these terms is made by BMJ to the Submitting Author unless you are acting as an employee on behalf of your employer or a postgraduate student of an affiliated institution which is paying any applicable article publishing charge ("APC") for Open Access articles. Where the Submitting Author wishes to make the Work available on an Open Access basis (and intends to pay the relevant APC), the terms of reuse of such Open Access shall be governed by a Creative Commons licence – details of these licences and which [Creative Commons](#) licence will apply to this Work are set out in our licence referred to above.

Other than as permitted in any relevant BMJ Author's Self Archiving Policies, I confirm this Work has not been accepted for publication elsewhere, is not being considered for publication elsewhere and does not duplicate material already published. I confirm all authors consent to publication of this Work and authorise the granting of this licence.

1  
2  
3  
4 Does robotic- assisted unicompartmental knee arthroplasty have lower  
5  
6 complication and revision rates than the conventional procedure? A  
7  
8

9  
10 Systematic Review and Meta-Analysis

11 Yifeng Sun<sup>1</sup>, Wei Liu<sup>1</sup>, Jian Hou<sup>2</sup>, Xiuhua Hu<sup>1</sup>, Wenqiang Zhang<sup>1\*</sup>

12  
13 <sup>1</sup> Department of Orthopedic Surgery, The First Affiliated Hospital of Shandong First Medical  
14 University & Shandong Provincial Qianfoshan Hospital, Shandong Key Laboratory of Rheumatic  
15 Disease and Translational Medicine  
16  
17

18  
19 <sup>2</sup>Jimo Traditional Chinese Hospital, Qingdao, Shandong 266200, PR China

20  
21 \*Correspondence and requests for materials should be addressed to Wenqiang Zhang  
22  
23 ([qfszwq@sina.com](mailto:qfszwq@sina.com)).  
24  
25  
26  
27  
28  
29  
30  
31  
32  
33  
34  
35  
36  
37  
38  
39  
40  
41  
42  
43  
44  
45  
46  
47  
48  
49  
50  
51  
52  
53  
54  
55  
56  
57  
58  
59  
60

## Abstract

**Objective:** We conducted a systematic review and meta-analysis of studies on patients who underwent unicompartmental knee arthroplasty (UKA) and compared the complications, revision rate, and non-implant specific complications between robotic-assisted and conventional UKA.

**Design:** Systematic review and meta-analysis.

**Data sources:** PubMed, Embase, Web of Science, and Cochrane databases were searched up to 30 June 2020

**Eligibility criteria:** Case-control studies comparing robotic-assisted and conventional UKA

**Data extraction and synthesis:** Data from all eligible articles were independently extracted by two authors. We analysed the differences in the outcomes between robotic-assisted and conventional UKA by calculating the corresponding 95% confidence interval (CI) and pooled relative risk (RR]). Heterogeneity was assessed using the chi-square and I-square tests. All the analyses were performed using the 'metafor' package of the R 3.6.2 software.

**Results:** In all, 16 studies involving 50024 patients were included in the final meta-analysis. We found that robotic-assisted UKA had fewer complications (RR: 0.52, 95% CI: 0.28-0.96, P=0.036) and lower revision rates (RR: 0.42, 95% CI: 0.20-0.86, P=0.017) than conventional UKA. We observed no significant differences in the non-implant specific complications between the two surgical techniques (RR: 0.80, 95% CI: 0.61-1.04, P=0.96). No publication bias was found in this meta-analysis.

**Conclusions:** This study showed that robotic-assisted UKA had fewer complications and lower revision rates than the conventional procedure. More large-scale RCT studies with a longer follow-up duration for evaluating the efficacy of both treatments in this patient population are necessary in the future.

### Strengths and limitations of this study

- ▶ We conducted a meta-analysis to find the best evidence to compare the robotic-arm assisted and manual unicompartmental knee arthroplasty (UKA).
- ▶ Long-term revision rates depend on the year of follow up; however, all the included studies had short-term follow up (3 months to 60 months). Hence, the results of revision rates are questionable.
- ▶ some studies were not RCTs and had small sample sizes, which increases the possibility of

1  
2  
3  
4 publication bias

5 ▶ The relatively modest sample size might have led to an unavoidable risk of bias.

6  
7 ▶ Our results were unadjusted for other factors that might influence the outcomes related to knee  
8 function such as patient age and weight, the anterior cruciate ligament, soft tissue balance,  
9 composition and thickness of the polyethylene component, etc.  
10  
11

12  
13 **Keywords:** Unicompartmental knee arthroplasty; Robotic arm-assisted UKA; Conventional UKA;  
14  
15 Meta-analysis.  
16

17 **Abbreviations:** Unicompartmental knee arthroplasty, UKA; Robotic arm-assisted UKA,  
18  
19 RAUKA; Conventional UKA;  
20  
21  
22  
23

## 24 **Introduction**

25  
26 Unicompartmental knee arthroplasty (UKA) is often performed for treating isolated  
27 compartmental knee osteoarthritis due to its minimally invasive approach and for bone resection  
28 required during surgery. However, higher rates of revision surgery (10%–20%) have been reported  
29 in patients undergoing UKA than in those undergoing total knee arthroplasty<sup>1</sup>. There might be  
30 multiple reasons for the higher failure rate, including poor patient selection and component design;  
31 some authors have also attributed it to malpositioning<sup>2</sup>. The use of robotic systems with promising  
32 short-term radiological outcomes of the implants and precision in bone cuts during UKA has  
33 significantly increased. In recent times, approximately 15–20% of robotic-assisted UKA surgeries  
34 have been developed to improve the clinical efficacy<sup>3</sup>. Most experts believe that the use of robotic-  
35 assisted UKA shows significantly better component angle alignment accuracy and functional  
36 outcomes, and higher satisfaction than that of conventional UKA. However, there is a considerable  
37 variation between the complication and revision rates reported in previous studies, which has made  
38 it difficult to estimate the safety outcomes of the two surgical techniques<sup>4,5</sup>.  
39  
40  
41  
42  
43  
44  
45  
46  
47  
48  
49

50  
51 The previous meta-analyses compared the effects and safety of the robotic-assisted and  
52 conventional UKA. In a meta-analysis by Fu et al. it was reported that the robotic-assisted system  
53 in UKA showed no decrease in the rate of adverse events compared to the conventional UKA.  
54 However, few articles (only 7 studies) were included in the meta-analysis, and the difference in the  
55 revision rates between the two techniques was not compared<sup>6</sup>. Another meta-analysis by Zhang et  
56  
57  
58  
59  
60

1  
2  
3  
4 al. contradicted the conclusion about the adverse events by Fu et al. and reported that robotic-  
5 assisted UKA could significantly reduce the rate of complications; however, the results were also  
6 subject to the sample size and follow-up duration, which might influence the assessment of the  
7 difference in outcomes between robotic-assisted and conventional UKA<sup>4</sup>. Another recent latest  
8 meta-analysis did not reach a definitive conclusion regarding the complications<sup>5</sup>. Therefore, we  
9 conducted a systematic review and meta-analysis of studies with patients who underwent UKA to  
10 compare the rate of complications, revision rate, and non-implant specific complications between  
11 robotic-assisted and conventional UKA. Our hypothesis was that there would be no obvious  
12 differences in the complications and revision rates between the two groups.  
13  
14  
15  
16  
17  
18  
19  
20

## 21 **Methods**

### 22 **Search strategy**

23  
24 We searched PubMed, Web of Science, Embase, and Cochrane databases using combinations  
25 of the following keywords: 'Unicompartmental Knee Arthroplasty', 'UKA', 'conventional UKA',  
26 'traditional UKA', 'manual UKA', 'robotic-assisted UKA', 'non-robotically assisted UKA',  
27 'complications', 'adverse events', and 'revision' (last updated on 30 June 2020). References of the  
28 identified reports were also retrieved and reviewed for other related studies. All studies were  
29 carefully and repeatedly evaluated. The study period, treatment information, the hospital, and any  
30 additional inclusion criteria were used to define duplicate or overlapping data.  
31  
32  
33  
34  
35  
36  
37  
38

### 39 **Inclusion and exclusion criteria**

40  
41 Studies that met the following criteria were eligible for inclusion in this study: (1) original studies  
42 about unicompartmental knee arthroplasty; (2) comparison of robotic-assisted and conventional  
43 UKA; and (3) providing controls and effective data (included RCT, PCT, CC, Retrospective  
44 comparative study); (4) publication in English. Exclusion criteria were as follows: (1) literatures  
45 published as a talk, review, digest, letter, commentary, digest or case report; (2) model-based or  
46 cadaver studies; (3) duplicate or overlapping data; and (4) not case-control studies.  
47  
48  
49  
50  
51  
52

### 53 **Data extraction and quality assessment**

54  
55 Data from all the eligible articles were independently extracted by two authors, who also  
56 discussed any disagreements and arrived at a consensus. Data retrieved from each study included  
57 the first author's name, year of publication, country, methods, number of patients, follow-up  
58  
59  
60



1  
2  
3  
4 duration, complications, revision rate, and non-implant specific complications. Three experienced  
5  
6 reviewers used the Modified Newcastle-Ottawa Quality Assessment Scale (NOS) to evaluate the  
7  
8 quality of the selected studies. Studies of superior quality were assigned a score of 9, high quality  
9  
10 studies a score  $\geq 6$ , moderate quality studies a score between 3 and 5, and low-quality studies a  
11  
12 score  $< 3$ <sup>7</sup>.

### 13 **Statistical analysis**

14  
15 We analysed the differences in outcomes between robotic-assisted and conventional UKA by  
16  
17 calculating the corresponding 95% confidence interval (CI) and pooled relative risk (RR)].  
18  
19 Heterogeneity was assessed using the chi-square and I-square tests. Fixed effect models were  
20  
21 employed when there was no significant heterogeneity ( $I^2 \leq 50\%$ ,  $P > 0.10$ ); else, a random-effects  
22  
23 model was used to obtain the pooled effects among the included studies. Galbraith plots were used  
24  
25 to detect the potential sources of heterogeneity<sup>8</sup>. Normal quantile-quantile (Q-Q) plots were used to  
26  
27 check for the deviation of the data from the confidence interval. Outlier and influence analyses were  
28  
29 performed by inspecting the plots for externally standardised residues, DFFITS values, Cook's  
30  
31 distances, covariance ratios, estimates of  $\tau^2$ , and test statistics for residual heterogeneity when each  
32  
33 study is excluded in turn, hat values, and weights for each study included in the analysis<sup>9</sup>.  
34  
35 Publication bias was assessed by inspection of a contour-enhanced funnel plot, with contours at  
36  
37 90%, 95%, and 99% confidence intervals. All the analyses were performed using the 'metafor'  
38  
39 packages of the R 3.6.2 software<sup>10</sup>. A 2-tailed  $P < 0.05$  was considered statistically significant.

### 40 **Patient and public involvement**

41  
42 There was no patient and public involvement in this systematic review.  
43  
44

## 45 **Results**

### 46 **Study characteristics**

47  
48 We initially identified 374 studies through our search of the PubMed, Embase, Web of  
49  
50 Science, and CBM databases. Of these, 322 did not meet the inclusion criteria and were excluded  
51  
52 following the review of the title and abstract. Of the 52 remaining studies that underwent a full-  
53  
54 text review, 28 were excluded because they were not comparative trials. In addition, 8 full-text  
55  
56 articles were excluded due to the following reasons: (1) data were incomparable or incomplete,  
57  
58 and (2) data about the complications were not available. Finally, 16 studies involving 50,024  
59  
60

1  
2  
3  
4 patients were included in the final meta-analysis. The study flow diagram is presented in Figure 1.  
5  
6 Table 1 summarises the main characteristics of the 16 included studies. The quality assessment of  
7  
8 the included studies is presented in detail in the supplementary material, and all the studies were  
9  
10 evaluated as being of moderate-to-high quality (Table S1).  
11  
12  
13  
14  
15  
16  
17  
18  
19  
20  
21  
22  
23  
24  
25  
26  
27  
28  
29  
30  
31  
32  
33  
34  
35  
36  
37  
38  
39  
40  
41  
42  
43  
44  
45  
46  
47  
48  
49  
50  
51  
52  
53  
54  
55  
56  
57  
58  
59  
60

For peer review only

**Table 1. Main characteristics of all articles included in the meta-analysis (RA-UKA: Robotic-assisted UKA; CONV-UKA: Conventional UKA)**

| Order | Study                                   | Year | Country | Design                  | No.knees<br>RA-UKA | Follow-up<br>(Month) | Complicati<br>on | Revision | Robot<br>Systems                       | Function scoring system                    |
|-------|-----------------------------------------|------|---------|-------------------------|--------------------|----------------------|------------------|----------|----------------------------------------|--------------------------------------------|
| 1     | Cobb <i>et al</i> <sup>11</sup>         | 2006 | UK      | RCT                     | 19<br>15           | 4.5M                 | 1<br>2           | NULL     | Acrobot system<br>(Acrobot Co.)        | AKSS, WOMAC                                |
| 2     | Lonner <i>et al</i> <sup>3</sup>        | 2010 | USA     | PCT                     | 31<br>27           | 3 M                  | 1<br>0           | NULL     | Tactile Guidance<br>System (MAKO Co.)  | NULL                                       |
| 3     | Hansen <i>et al</i> <sup>12</sup>       | 2014 | USA     | Case control            | 30<br>32           | 24M                  | 7<br>3           | 0<br>1   | RIO™ System<br>(MAKO Co.)              | Recovery time<br>First, Ambulation         |
| 4     | Maccallum<br><i>et al</i> <sup>13</sup> | 2016 | USA     | PCT                     | 87<br>177          | 32.4M                | 3<br>7           | 3<br>7   | RIO™ System<br>( Stryker Mako)         | NULL                                       |
| 5     | Blyth <i>et al</i> <sup>14</sup>        | 2017 | UK      | RCT                     | 64<br>65           | 12M                  | 1<br>1           | NULL     | Acrobot system<br>(Acrobot Co.)        | AKSS, AKSS                                 |
| 6     | Gilmour <i>et al</i> <sup>15</sup>      | 2018 | UK      | RCT                     | 58<br>54           | 24M                  | 0<br>2           | 0<br>2   | RIO™ System<br>(MAKO Co.)              | AKSS,OKS,FJS<br>Pain VAS                   |
| 7     | Kayani <i>et al</i> <sup>16</sup>       | 2018 | UK      | PCT                     | 60<br>60           | 1M                   | 0<br>2           | NULL     | RIO™ System<br>(MAKO Co.)              | NULL                                       |
| 8     | Batailler <i>et al</i> <sup>17</sup>    | 2018 | France  | Case control            | 80<br>80           | 19.7M                | 4<br>7           | 4<br>7   | Navio system (Smith<br>and Nephew Co.) | IKSS                                       |
| 9     | Canetti <i>et al</i> <sup>18</sup>      | 2018 | France  | Retrospective<br>cohort | 11<br>17           | 39.3 M               | 0<br>1           | NULL     | Navio system (Smith<br>and Nephew Co.) | IKSS                                       |
| 10    | Banger <i>et al</i> <sup>19</sup>       | 2019 | UK      | RCT                     | 74<br>65           | 60M                  | 0<br>6           | 0<br>2   | RIO™ System<br>(MAKO Co.)              | AKSS, JFS, Pain VAS,<br>Stiffness, VAS,OKS |
| 11    | Wong <i>et al</i> <sup>20</sup>         | 2019 | USA     | Retrospective<br>cohort | 58<br>118          | 3M                   | 7<br>7           | 7<br>7   | RIO™ System<br>(MAKO Co.)              | SF-12, WOMAC, KSFS                         |

|    |                                         |      |           |                                 |                  |     |             |             |                                     |                                                                 |
|----|-----------------------------------------|------|-----------|---------------------------------|------------------|-----|-------------|-------------|-------------------------------------|-----------------------------------------------------------------|
| 12 | Cool <i>et al</i> <sup>21</sup>         | 2019 | USA       | Retrospective comparative study | 246<br>492       | 24M | 2<br>26     | 2<br>26     | NULL                                | NULL                                                            |
| 13 | Kayani <i>et al</i> <sup>22</sup>       | 2019 | UK        | PCT                             | 73<br>73         | 3M  | 0<br>2      | NULL        | RIO™ System (MAKO Co.)              | Pain scores, Opiate analgesia, Straight leg raise, Knee flexion |
| 14 | Vakharia <i>et al</i> <sup>23</sup>     | 2019 | USA       | Retrospective comparative study | 13,617<br>21,444 | 36M | 125<br>1327 | 125<br>1327 | NULL                                | NULL                                                            |
| 15 | Mergenthaler <i>et al</i> <sup>24</sup> | 2020 | France    | Case control                    | 200<br>191       | 24M | 19<br>34    | 8<br>21     | Navio system (Smith and Nephew Co.) | KSS score                                                       |
| 16 | St Mart <i>et al</i> <sup>25</sup>      | 2020 | Australia | Retrospective comparative study | 2851<br>9561     | 46M | 47<br>301   | 47<br>301   | Mako-assisted Restoris (MAKO Co.)   | NULL                                                            |

RCT : Randomized Controlled Trial; PCT: Prospective cohort trial

1  
2  
3  
4  
5  
6  
7  
8  
9  
10  
11  
12  
13  
14  
15  
16  
17  
18  
19  
20  
21  
22  
23  
24  
25  
26  
27  
28  
29  
30  
31  
32  
33  
34  
35  
36  
37  
38  
39  
40  
41  
42  
43  
44  
45  
46

## Complications

Complications that lead to failure following UKA include bearing dislocation, aseptic loosening, polyethylene wear, periprosthetic fracture, progression of arthritis to the contralateral compartment, infection, bone-implant impingement, retaining of cement debris in the joint, knee ankylosis, wound complications, deep haematoma, infection, thrombosis, persistent pain pin-site infection and fracture, and other adverse events. All the 16 studies reported the data about complications, which mainly included prosthetic loosening, subsidence, dislocated polyethylene bearing, periprosthetic fracture, knee ankylosis, wound complications, deep haematoma, infection, thrombosis, persistent pain, etc. The chi-square and I-square test results showed statistical heterogeneity between the included studies ( $P < 0.01$ ;  $I^2 = 87.1\%$ ), and Galbraith plots showed that no studies were found to cause heterogeneity (Figure. 2A). The plotted points were close to a sloped straight line on the quantile-quantile (Q-Q) plot (Figure. 2B), which showed that there was no significant deviation from the confidence interval in our studies. Therefore, a random-effects model was used for the analysis. We found that robotic-assisted UKA had a lower rate of complications than conventional UKA (RR: 0.52, 95% CI: 0.28-0.96,  $P = 0.0366$ ; Figure. 2C).

## Revision rate

Ten studies reported data regarding complications that required surgery between the two groups. The chi-square and I-square test results showed statistical heterogeneity among the included studies ( $P < 0.01$ ;  $I^2 = 90.3\%$ ), and Galbraith plots were used to determine the most heterogeneous studies; however, no studies were excluded (Figure. 3A). As seen from the Q-Q plot, there was no significant deviation from the confidence interval in our studies (Figure. 3B). Data pooled using a random-effects model indicated that robotic-assisted UKA had lower rates of revision surgery (RR: 0.42, 95% CI: 0.20-0.86,  $P = 0.017$ ; Figure. 3C).

## Non-implant specific complications

Non-implant specific complications were reported in 10 studies, which mainly included infection, knee ankylosis, wound complications, deep haematoma, infection, thrombosis, persistent pain, pin-site infection and fracture in our meta-analysis. The chi-square and I-square test results indicated no statistical heterogeneity among the included studies ( $P = 0.49$ ;  $I^2 = 0.00\%$ ), and Galbraith plots (Figure. 4A) and quantile-quantile (Q-Q) plots (Figure. 4B) also showed that there was no statistical heterogeneity. We observed no significant differences in the non-implant-specific complications

1  
2  
3  
4 between the two groups by using a fixed-effects model (RR: 0.80, 95% CI: 0.61-1.04, P=0.96;  
5  
6 Figure. 4C).

### 7 8 **Publication bias**

9  
10 We assessed publication bias using Begg's test<sup>26</sup>. The contour-enhanced funnel plot for the  
11  
12 meta-analysis of the complications for robotic-assisted versus conventional UKA was largely  
13  
14 symmetric ( $P_{\text{Begg}}=0.96$ ; Figure. 5A). Similar results were observed for the revision rate ( $P_{\text{Begg}}=0.78$ ;  
15  
16 Figure. 5B) and non-implant specific complications ( $P_{\text{Begg}}=1.16$ ; Figure. 5C).

### 17 18 **Outlier and influence analyses**

19  
20 The presence of outliers and influential cases can affect the validity and robustness of the  
21  
22 conclusions from a meta-analysis. Figure 5 shows the standardised residuals (rstudent), DFFITS  
23  
24 (dffits), Cook's distances (cook.d), covariance ratios (cov.r), estimates of  $\tau^2$  (tau2.del), and test  
25  
26 statistics (QE.del) for this random-effects model that was used for the analysis of the complications  
27  
28 (Figure. 6). Study 14 (Vakharia,2019) was identified as a potential outlier, which led to the  
29  
30 heterogeneity and also appeared to be an influential case. Since the study had a large sample size  
31  
32 (35,061 patients, Robot =13,617; CONV =21,444), which makes it useful to study the national  
33  
34 trends, and the hat values and weights values showed that this study comprised the largest proportion  
35  
36 in the meta-analysis, it was not excluded, but the outlier was included in the meta-analysis. A similar  
37  
38 impact was seen in the analysis of the revision rate. No outlier was included in the analysis of non-  
39  
40 implant-specific complications.

### 41 42 **Discussion**

43  
44 For more than 50 years, UKA has been performed to treat isolated compartmental knee arthritis.  
45  
46 Despite many years of experience in performing UKA, some studies have reported that UKA has  
47  
48 higher rates of failure compared to total knee arthroplasty (TKA)<sup>27</sup>. The newly designed robotic-  
49  
50 assisted systems are believed to increase the precision and accuracy of unicompartmental knee  
51  
52 arthroplasty, possibly leading to fewer complications and lower revision rates<sup>28</sup>. Many studies have  
53  
54 evaluated the complications of robotic-assisted UKA; however, there are few studies about the  
55  
56 complications of robotic-assisted UKA compared to conventional UKA. Researchers have reported  
57  
58 conflicting results regarding the complication rate between robotic-assisted and conventional UKA.  
59  
60 Hansen et al. and Blyth et al. did not find a significant difference in the rate of complications

1  
2  
3  
4 between the two techniques<sup>12,14</sup>. Wong et al. found that the RAA cohort had a higher early revision  
5 rate than the CONV group, while others reported that robotic-assisted UKA has fewer complications  
6 and lower revision rates than conventional UKA<sup>20,23,25</sup>. It is important to assess the complications  
7 of this new technology before it is widely used<sup>21</sup>. Therefore, we conducted a systematic review and  
8 meta-analysis to compare the complication rates, revision rate, and non-implant-specific  
9 complications between robotic-assisted and conventional UKA. The main finding of our meta-  
10 analysis is that robotic-assisted UKA has fewer complications and lower revision rates than  
11 conventional UKA; however, there are no significant differences in the non-implant specific  
12 complications. Thus, we acknowledge that robotic-assisted UKA had fewer complications and  
13 lower revision rates than the conventional procedure.  
14  
15  
16  
17  
18  
19  
20  
21  
22

23 Many publications have explored the relationship between the component position and its impact  
24 on implant survival and patient satisfaction<sup>29, 30</sup>. Some authors believe that a reduction in the  
25 alignment errors of these components will ultimately have an impact on implant function or  
26 survival<sup>31</sup>. Some studies confirmed that the proportion of patients with tibial and femoral component  
27 implantation within 2° of the target position was significantly greater in the group that underwent  
28 robotic-assisted UKA, resulting in better long-term clinical scores and a lower implant failure rate<sup>13,</sup>  
29 <sup>32, 33</sup>. Therefore, it could be demonstrated that the use of a robotic-assisted system in UKA can  
30 reduce implantation errors, leading to fewer complications and lower rates of revision surgery than  
31 conventional UKA. While the non-implant-specific complications are likely to be related to the  
32 procedure, fewer were considered to be directly related to the comparative study itself<sup>11</sup>.  
33 Mergenthaler reported that there was no complication due to the use of the robotic system<sup>24</sup>. Andrew  
34 believes that no further rigid fixation device is necessary, which reduces the potential complications  
35 such as infection, iatrogenic fractures, or soft tissue injury because of the robot's weight and  
36 movement<sup>34</sup>. However, there were no significant differences in the non-implant-specific  
37 complications between the two techniques in our meta-analysis. Therefore, no evidence suggested  
38 that the use of robotic-assisted UKA may add the non-implant-specific complications to this  
39 procedure.  
40  
41  
42  
43  
44  
45  
46  
47  
48  
49  
50  
51  
52  
53  
54  
55

56 Though robotic-assisted UKA is widely practiced and is the current trend in orthopaedic surgery,  
57 it has some shortcomings. Robotic-assisted UKA was found to significantly prolong the duration of  
58 surgery compared to conventional UKA (Figure. S7). Some studies have also documented that  
59  
60

1  
2  
3  
4 robotic arm-assisted UKA involves a higher cost<sup>35, 36</sup>. In addition, the device-related complications  
5 such as pin site fracture and infection cannot be ignored. We checked all articles included in the  
6 meta-analysis as to whether they included a statement on the funding or interest of the work  
7 presented. When such a statement was provided we categorised the information as an industry-  
8 funded study or authors having a financial conflict of interest. We found that the included articles  
9 were more likely to be industry-funded or written by authors with financial conflicts of interest  
10 (Figure. S8). Therefore, this information should not be overlooked, and more large-scale studies  
11 with non-commercial support for evaluating the efficacy of both treatments in this patient population  
12 are needed in the future.  
13  
14  
15  
16  
17  
18  
19  
20  
21  
22

23 There are several limitations to this meta-analysis. First, long-term revision rates depend on the year  
24 of follow up; however, all the included studies had short-term follow up (3 months to 60 months).  
25 Hence, the results of revision rates are questionable. Hence, future studies with a longer follow-up  
26 duration, preferably 10 years, are necessary to assess the complications and revision rates. Second,  
27 some studies were not RCTs and had small sample sizes, which increases the possibility of  
28 publication bias. Therefore, our results should be further confirmed by large-scale RCT studies.  
29 Thirdly, the types of RA-UKA performed in each study were different, as shown in Table 1. The  
30 different types used were Acrobot system, RIO™ System or Mako-assisted Restoris System, and  
31 Navio system. Rapid advances in robotic-assisted technology have led to the development of UKA  
32 over the past 10 years. Implant position, soft tissue balance, and radiographic components alignment  
33 appear to be gradually improved with the development of robotic-assisted systems. Considering the  
34 evolution of this technology and its possible impact on the outcomes, well-designed studies are  
35 necessary to advance our understanding of the impact of different robotic systems. Fourth, all the  
36 included studies were limited to the English literature; therefore, some related studies published in  
37 other languages that might have met the inclusion criteria could have been missed. Fifth, most of  
38 the studies in our meta-analysis have not reported the pin site complications and device-specific  
39 complications. Revisions secondary to pin site fracture were included in some studies; however, the  
40 sample size is small. Therefore, we did not conduct a systematic research on these specific  
41 complications and revisions. Although we attempted to identify and retrieve all additional  
42 unpublished information, some missing data were inevitable. In addition, our results were  
43  
44  
45  
46  
47  
48  
49  
50  
51  
52  
53  
54  
55  
56  
57  
58  
59  
60



1  
2  
3  
4 unadjusted for other factors that might influence complication outcomes such as patient age and  
5 weight, the anterior cruciate ligament, soft tissue balance, composition and thickness of the  
6 polyethylene component and others. Finally, given that there is no established functional scoring  
7 system to measure the postoperative function and due to the limited number of exact P-values, we  
8 did not evaluate the functional outcome in our meta-analysis (Table 1). However, many studies have  
9 reported shown that RA-UKA had a reliable, responsive, and reproducible postoperative function.  
10 Therefore, it is necessary to establish a universal system for assessing the postoperative function in  
11 patients with UKA.  
12  
13  
14  
15  
16  
17  
18

## 19 **Conclusions**

20  
21 To summarise, the data from this meta-analysis indicate that robotic-assisted UKA is  
22 associated with fewer complications and lower rates of revision surgery than conventional UKA.  
23 No evidence suggested that the use of robotic-assisted UKA might increase the rate of non-implant-  
24 specific complications with this procedure.  
25  
26  
27  
28

29 Therefore, this study showed that robotic-assisted UKA had fewer complications and lower revision  
30 rates than the conventional procedure. More large-scale RCT studies with a longer follow-up  
31 duration for evaluating the efficacy of both treatments in this patient population are necessary in the  
32 future.  
33  
34  
35  
36

## 37 **Acknowledgments**

38  
39 We gratefully appreciate Shandong First Medical University for providing the statistical and  
40 technical assistance.  
41  
42  
43

## 44 **Author contributions**

45  
46 Yifeng Sun conceived the study and wrote the manuscript, Wenqiang Zhang analysed the data,  
47 and Wei Liu generated data. Xiuhua Hu and Jian Hou reviewed the manuscript.  
48  
49

## 50 **Funding sources**

51  
52 This work was supported by the Natural Science Foundation of China (81702667) and Wu Jieping  
53 Medical Foundation (320.6750.18466), and Shandong Provincial Key Research and Development  
54 Project (GG201809250496).  
55  
56  
57

## 58 **Competing interests**

The authors declare they have no conflict of interest.

## Patient consent for publication

Not required.

## Data sharing statement

All data relevant to the study are included in the article or uploaded as supplementary information.

## Ethics approval statement

Not applicable.

## References

1. Labek G, Sekyra K, Pawelka W, Janda W, Agreiter M, Schlichtherle R, Stöckl B, Krismer M: outcome And Reproducibility Of Data Concerning The Oxford Medial Unicompartmental Knee Arthroplasty *Orthopaedic Proceedings* 2011; 93:131-.
2. Lang J, Mannava S, Floyd A, Goddard M, Smith B, Mofidi A, M. Seyler T, Jinnah R. Robotic systems in orthopaedic surgery. *The Journal of bone and joint surgery British volume* 2011;**93**: 1296-9.
3. Lonner JH, Moretti VM. The Evolution of Image-Free Robotic Assistance in Unicompartmental Knee Arthroplasty. *American journal of orthopedics* 2016;**45**: 249-54.
4. Zhang F, Li H, Ba Z, Bo C, Li K. Robotic arm-assisted vs conventional unicompartmental knee arthroplasty: A meta-analysis of the effects on clinical outcomes. *Medicine* 2019;**98**.
5. Chin BZ, Tan SSH, Chua KCX, Budiono GR, Syn NL, Oneill GK. Robot-Assisted versus Conventional Total and Unicompartmental Knee Arthroplasty: A Meta-analysis of Radiological and Functional Outcomes. *Journal of Knee Surgery* 2020.
6. Fu J, Wang Y, Li X, Yu B, Ni M, Chai W, Hao L, Chen J. Robot-assisted vs. conventional unicompartmental knee arthroplasty : Systematic review and meta-analysis. *Orthopade* 2018;**47**: 1009-17.
7. Wells G: The Newcastle-Ottawa Scale (NOS) for Assessing the Quality of Non-Randomised Studies in Meta-Analyses *Symposium on Systematic Reviews: Beyond the Basics* 2014.
8. Galbraith RF. Some Applications of Radial Plots. *Journal of the American Statistical Association* 1994;**89**: 1232-42.
9. Viechtbauer W, Cheung MWL. Outlier and influence diagnostics for meta-analysis. *Research Synthesis Methods* 2010;**1**: 112-25.
10. Viechtbauer W. Conducting Meta-Analyses in R with the metafor Package. *Journal of Statistical Software* 2010;**36**: 1-48.
11. Cobb J, Henckel J, Gomes P, Harris S, Jakopec M, Rodriguez F, Barrett ARW, Davies BL. Hands-on robotic unicompartmental knee replacement - A prospective, randomised controlled study of the Acrobot system. *Journal of Bone and Joint Surgery-british Volume* 2006;**88**: 188-97.
12. Hansen DC, Kusuma SK, Palmer RM, Harris KB. Robotic Guidance Does Not Improve Component Position or Short-Term Outcome in Medial Unicompartmental Knee Arthroplasty. *Journal of Arthroplasty* 2014;**29**: 1784-9.
13. Maccallum KP, Danoff JR, Geller JA. Tibial baseplate positioning in robotic-assisted and

1  
2  
3 conventional unicompartmental knee arthroplasty. *European Journal of Orthopaedic Surgery and*  
4 *Traumatology* 2016;**26**: 93-8.

5  
6 14. Blyth M, Anthony I, Rowe P, Banger M, Maclean A, Jones B. Robotic arm-assisted versus  
7 conventional unicompartmental knee arthroplasty: Exploratory secondary analysis of a randomised  
8 controlled trial. *Bone and Joint Research* 2017;**6**: 631-9.

9  
10 15. Gilmour A, Maclean A, Rowe P, Banger M, Donnelly I, Jones B, Blyth M. Robotic-Arm Assisted  
11 Versus Conventional Unicompartmental Knee Arthroplasty. The 2 year Clinical outcomes of a  
12 Randomised Controlled Trial. *Journal of Arthroplasty* 2018: S0883540318301980.

13  
14 16. Kayani, Konan, T JR, Pietrzak, S S, Huq, Tahmassebi, S F, Haddad. The learning curve associated  
15 with robotic-arm assisted unicompartmental knee arthroplasty. *Bone & Joint Journal* 2018.

16  
17 17. Batailler C, White N, Ranaldi FM, Neyret P, Servien E, Lustig S. Improved implant position and  
18 lower revision rate with robotic-assisted unicompartmental knee arthroplasty. *Knee surgery, sports*  
19 *traumatology, arthroscopy : official journal of the ESSKA* 2019;**27**: 1232-40.

20  
21 18. Canetti R, Batailler C, Bankhead C, Neyret P, Servien E, Lustig S. Faster return to sport after  
22 robotic-assisted lateral unicompartmental knee arthroplasty: a comparative study. *Archives of*  
23 *Orthopaedic and Trauma Surgery* 2018;**138**: 1765-71.

24  
25 19. Banger M, Blyth M, Jones B, MacLean A, Rowe P, Glasgow NG, Clyde GU. 5 Year Results Of A  
26 Randomised Trial Of Robotic Arm Assisted Vs Manual Unicompartmental Knee Arthroplasty.

27  
28 20. Wong J, Murtaugh T, Lakra A, Cooper HJ, Shah RP, Geller JA. Robotic-assisted  
29 unicompartmental knee replacement offers no early advantage over conventional unicompartmental  
30 knee replacement. *Knee Surgery, Sports Traumatology, Arthroscopy* 2019;**27**: 2303-8.

31  
32 21. Cool CL, Needham K, Khlopas A, Mont MA. Revision Analysis of Robotic Arm-Assisted and  
33 Manual Unicompartmental Knee Arthroplasty. *Journal of Arthroplasty* 2019;**34**: 926-31.

34  
35 22. Kayani B, Konan S, Tahmassebi J, Rowan FE, Haddad FS. An assessment of early functional  
36 rehabilitation and hospital discharge in conventional versus robotic-arm assisted unicompartmental  
37 knee arthroplasty. *Journal of Bone and Joint Surgery-british Volume* 2019: 24-33.

38  
39 23. Vakharia RM, Sodhi N, Cohen-Levy WB, Vakharia AM, Mont MA, Roche MW. Comparison of  
40 Patient Demographics and Utilization Trends of Robotic-Assisted and Non-Robotic-Assisted  
41 Unicompartmental Knee Arthroplasty. *The journal of knee surgery* 2019.

42  
43 24. Mergenthaler G, Batailler C, Lording T, Servien E, Lustig S. Is robotic-assisted unicompartmental  
44 knee arthroplasty a safe procedure? A case control study. *Knee surgery, sports traumatology,*  
45 *arthroscopy : official journal of the ESSKA* 2020.

46  
47 25. St Mart JP, de Steiger RN, Cuthbert A, Donnelly W. The three-year survivorship of robotically  
48 assisted versus non-robotically assisted unicompartmental knee arthroplasty. *The bone & joint journal*  
49 *2020*;**102-B**: 319-28.

50  
51 26. Macaskill P, Walter SD, Irwig L. A comparison of methods to detect publication bias in meta -  
52 analysis. *Statistics in medicine* 2001;**20**: 641-54.

53  
54 27. Sun X, Su Z. A meta-analysis of unicompartmental knee arthroplasty revised to total knee  
55 arthroplasty versus primary total knee arthroplasty. *Journal of Orthopaedic Surgery and Research*  
56 *2018*;**13**: 158.

57  
58 28. Roche MW. Robotic-assisted unicompartmental knee arthroplasty: the MAKO experience.  
59 *Clinics in Sports Medicine* 2014;**33**: 123-32.

60  
29. Gromov K, Korchi M, Thomsen MG, Husted H, Troelsen A. What is the optimal alignment of  
the tibial and femoral components in knee arthroplasty? An overview of the literature. *Acta*

1  
2  
3  
4  
5  
6  
7  
8  
9  
10  
11  
12  
13  
14  
15  
16  
17  
18  
19  
20  
21  
22  
23  
24  
25  
26  
27  
28  
29  
30  
31  
32  
33  
34  
35  
36  
37  
38  
39  
40  
41  
42  
43  
44  
45  
46  
47  
48  
49  
50  
51  
52  
53  
54  
55  
56  
57  
58  
59  
60

*orthopaedica* 2014;**85**: 480-7.

30. Vandekerckhove P-J, Lanting B, Bellemans J, Victor J, MacDonald S. The current role of coronal plane alignment in total knee arthroplasty in a preoperative varus aligned population: an evidence based review. *Acta Orthop Belg* 2016;**82**: 129-42.

31. Kim KT, Lee S, Kim TW, Lee JS, Boo KH. The influence of postoperative tibiofemoral alignment on the clinical results of unicompartmental knee arthroplasty. *Knee surgery & related research* 2012;**24**: 85.

32. Gromov K, Korchi M, Thomsen MG, Husted H, Troelsen A. What is the optimal alignment of the tibial and femoral components in knee arthroplasty. *Acta Orthopaedica* 2014;**85**: 480-7.

33. Chatellard R, Sauleau V, Colmar M, Robert H, Raynaud G, Brilhault J. Medial unicompartmental knee arthroplasty: Does tibial component position influence clinical outcomes and arthroplasty survival? *Orthopaedics & Traumatology-surgery & Research* 2013;**99**.

34. Pearle AD, Oloughlin PF, Kendoff D. Robot-Assisted Unicompartmental Knee Arthroplasty. *Journal of Arthroplasty* 2010;**25**: 230-7.

35. Moschetti WE, Konopka JF, Rubash HE, Genuario JW. Can Robot-Assisted Unicompartmental Knee Arthroplasty Be Cost-Effective? A Markov Decision Analysis. *The Journal of arthroplasty* 2016;**31**: 759-65.

36. Sinha RK. Outcomes of robotic arm-assisted unicompartmental knee arthroplasty. *American journal of orthopedics (Belle Mead, NJ)* 2009;**38**: 20-2.

## Figure legends

Figure 1. Flow diagram depicting the study selection procedure.

Figure 2. (A) Galbraith plot, (B) Quantile-Quantile (Q-Q) plot, and (C) Forest plot for the meta-analysis of complications between robotic-assisted and conventional unicompartmental knee arthroplasty.

Figure 3. (A) Galbraith plot, (B) Quantile-Quantile (Q-Q) plot, and (C) Forest plot for the meta-analysis of revision rate between robotic-assisted and conventional unicompartmental knee arthroplasty.

Figure 4. (A) Galbraith plot, (B) Quantile-Quantile (Q-Q) plot, and (C) Forest plot for the meta-analysis of non-implant specific complications between robotic-assisted and conventional unicompartmental knee arthroplasty.

Figure 5. Contour-enhanced funnel plots of the included studies showing no evidence of publication bias in complications (A), revision rate (B) and non-implant specific complications (C).

Figure 6. Outlier and influence analyses. The standardised residuals (rstudent), DFFITS (dffits), Cook's distances (cook.d), covariance ratios (cov.r), estimates of  $\tau^2$  (tau2.del) and test statistics

(QE.del) for the random-effects model that was used for the analysis of the complications.

Figure S7. (A) Galbraith plot, (B) Quantile-Quantile (Q-Q) plot, and (C) Forest plot for the meta-analysis of surgical time between robotic-assisted and conventional unicompartmental knee arthroplasty.

Figure S8. Industry funding and conflict of interest for manuscripts regarding robotic-arm assisted and conventional unicompartmental knee arthroplasty

## Table

Table 1. Main characteristics of all articles included in the meta-analysis

Table S1. Assessment of the quality of included studies using the Newcastle-Ottawa Scale.

Figure 1. Literature search and study selection.

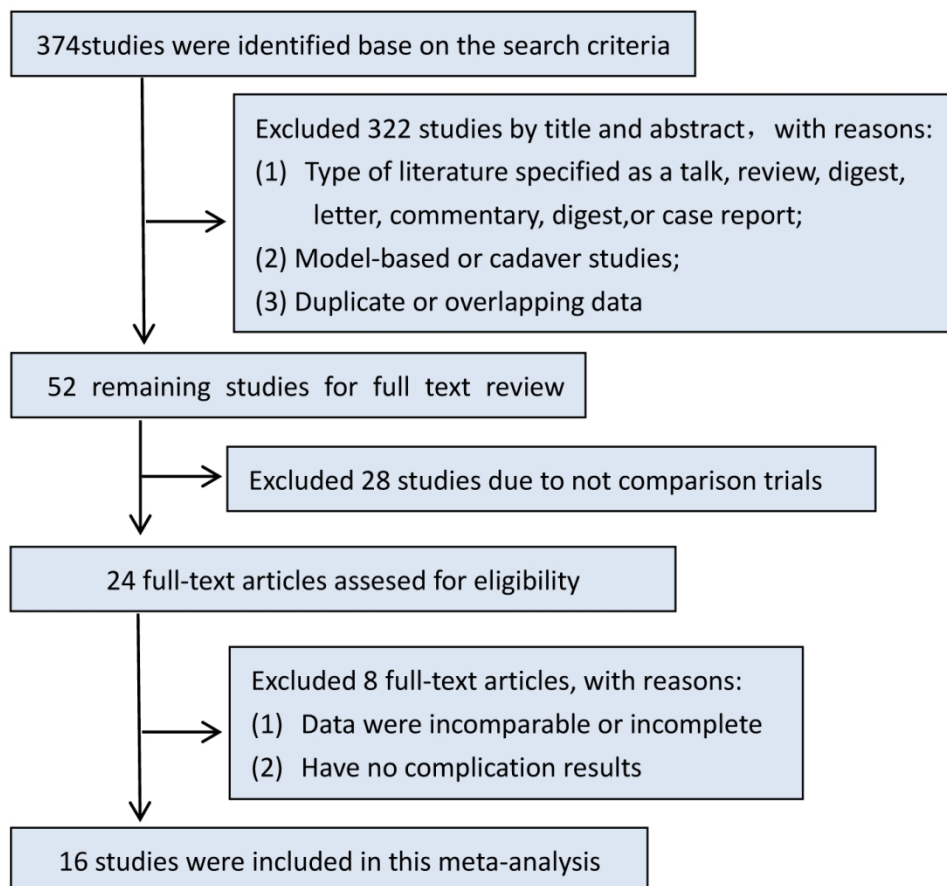

Figure 1. Flow diagram depicting the study selection procedure.

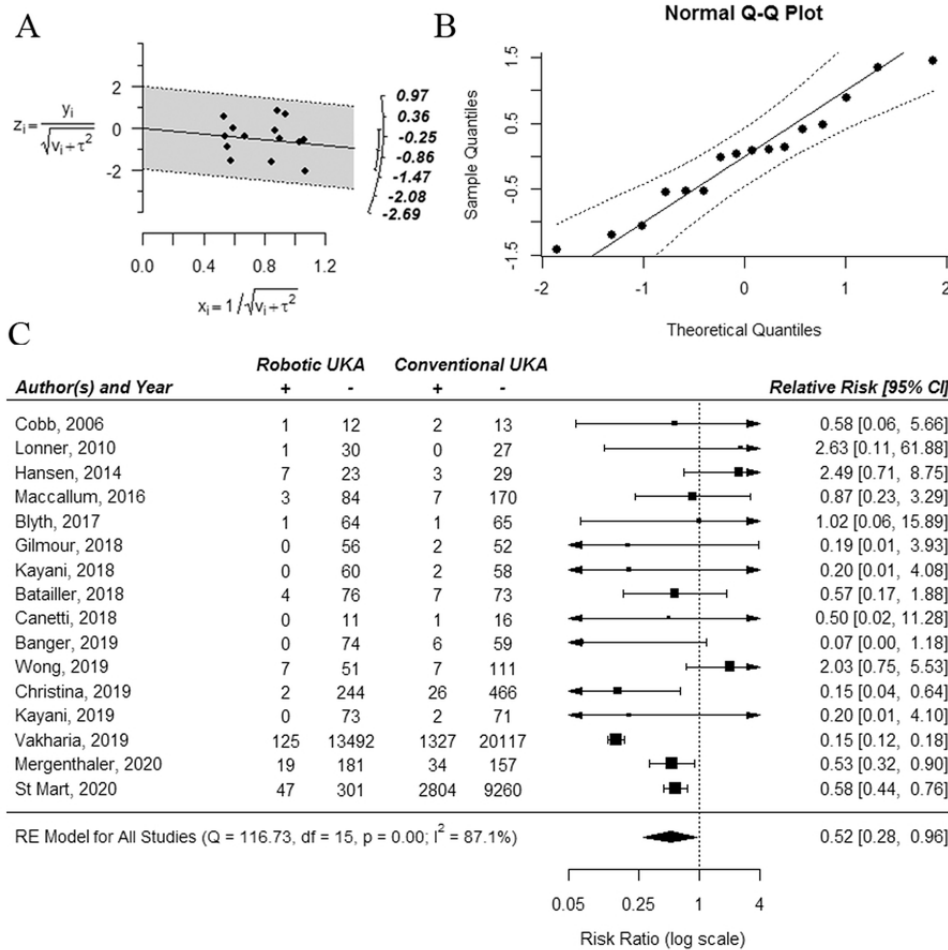

Figure 2. (A) Galbraith plot, (B) Quantile-Quantile (Q-Q) plot, and (C) Forest plot for the meta-analysis of complications between robotic-assisted and conventional unicompartmental knee arthroplasty.

79x77mm (300 x 300 DPI)

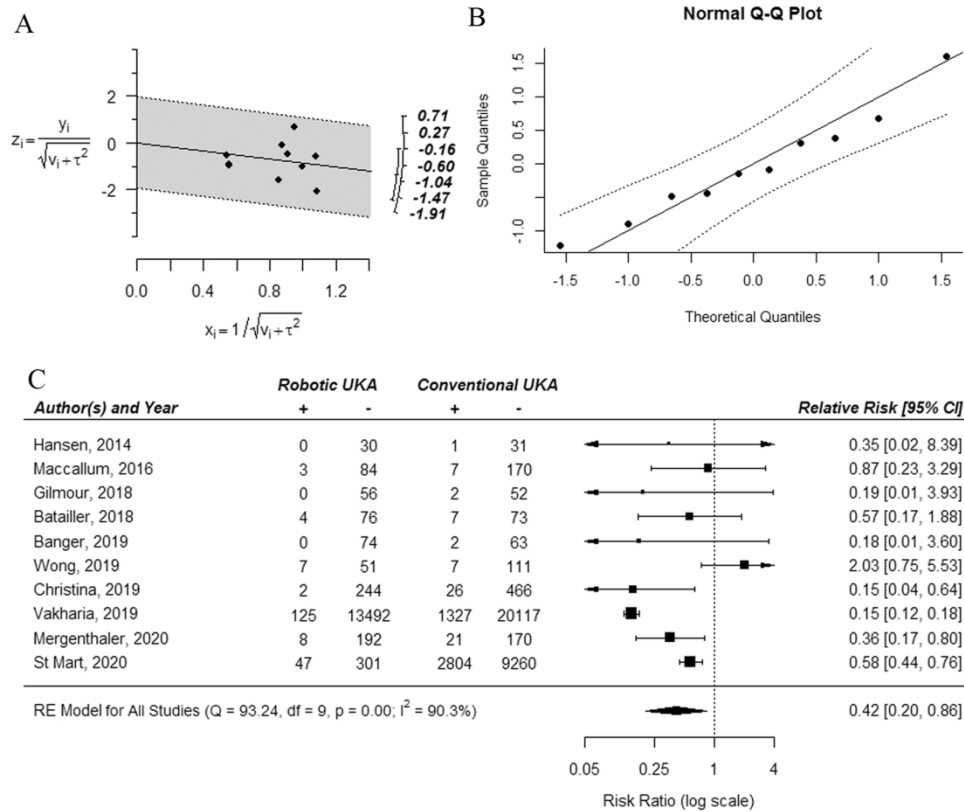

Figure 3. (A) Galbraith plot, (B) Quantile-Quantile (Q-Q) plot, and (C) Forest plot for the meta-analysis of revision rate between robotic-assisted and conventional unicompartmental knee arthroplasty.

152x124mm (300 x 300 DPI)



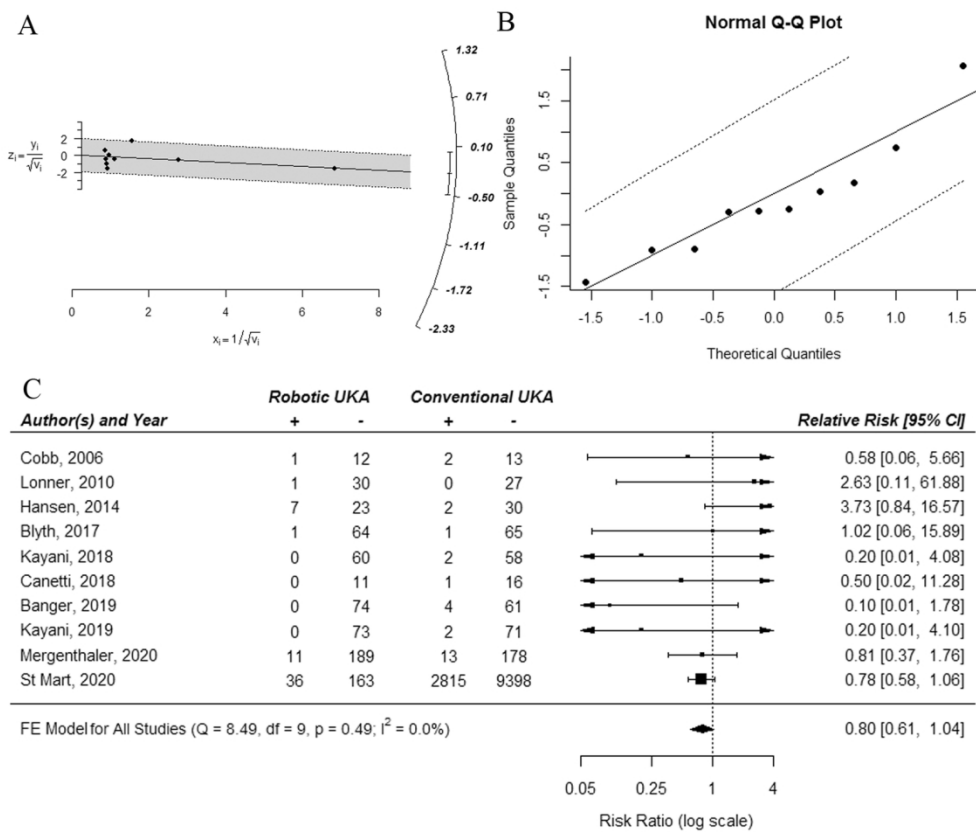

Figure 4. (A) Galbraith plot, (B) Quantile-Quantile (Q-Q) plot, and (C) Forest plot for the meta-analysis of non-implant specific complications between robotic-assisted and conventional unicompartmental knee arthroplasty.

147x124mm (300 x 300 DPI)

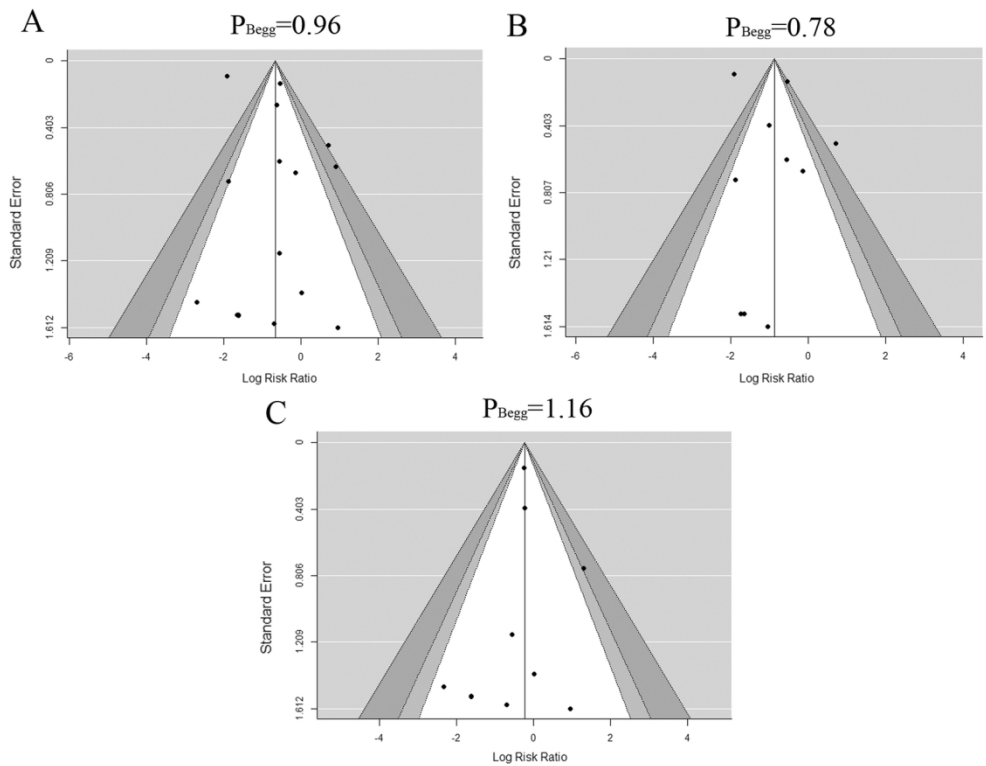

Figure 5. Contour-enhanced funnel plots of the included studies showing no evidence of publication bias in complications (A), revision rate (B) and non-implant specific complications (C).

150x118mm (300 x 300 DPI)

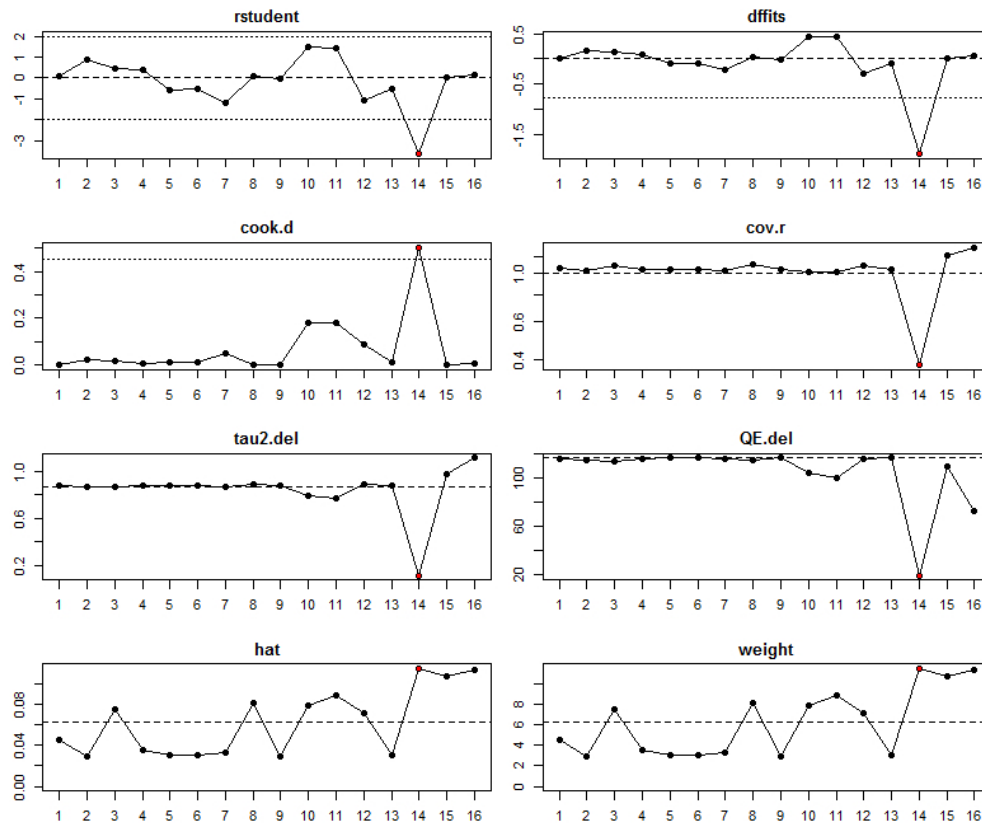

Figure 6. Outlier and influence analyses. The standardised residuals (rstudent), DFFITS (dffits), Cook's distances (cook.d), covariance ratios (cov.r), estimates of  $\tau^2$  (tau2.del) and test statistics (QE.del) for the random-effects model that was used for the analysis of the complications.

210x177mm (95 x 95 DPI)

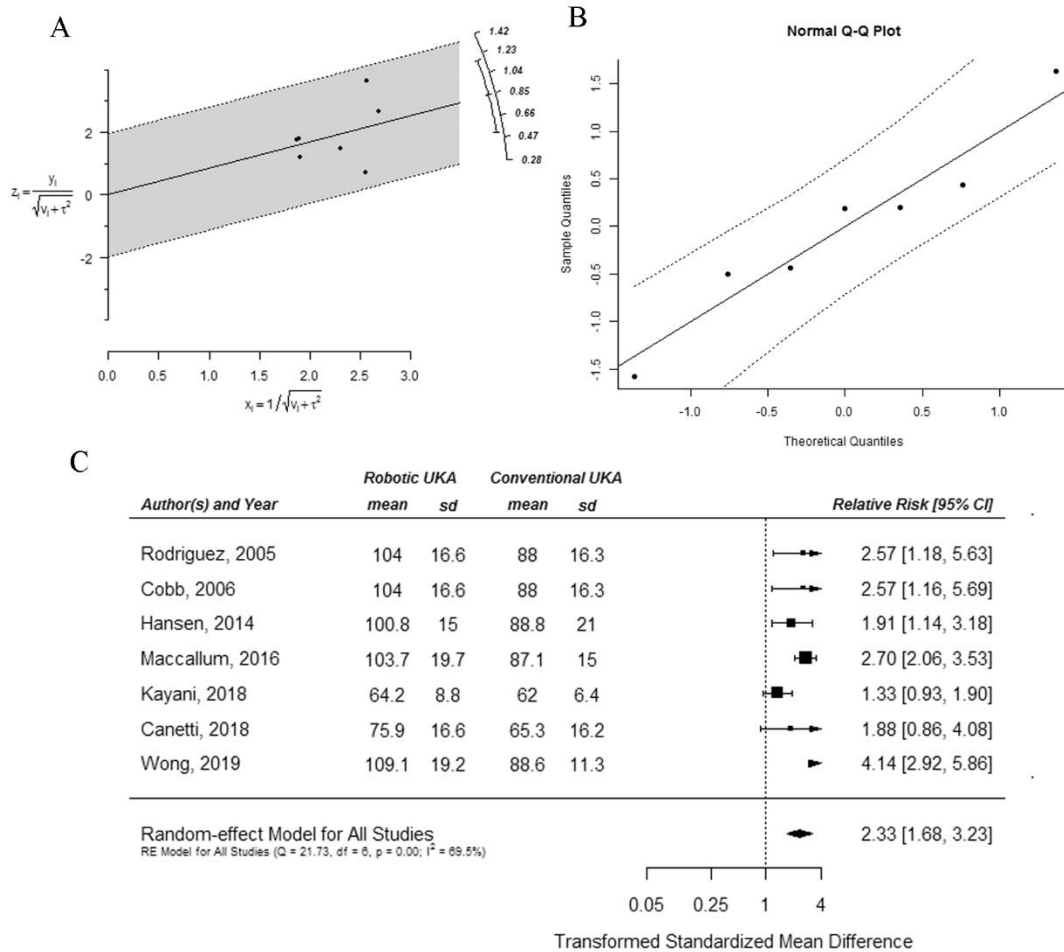

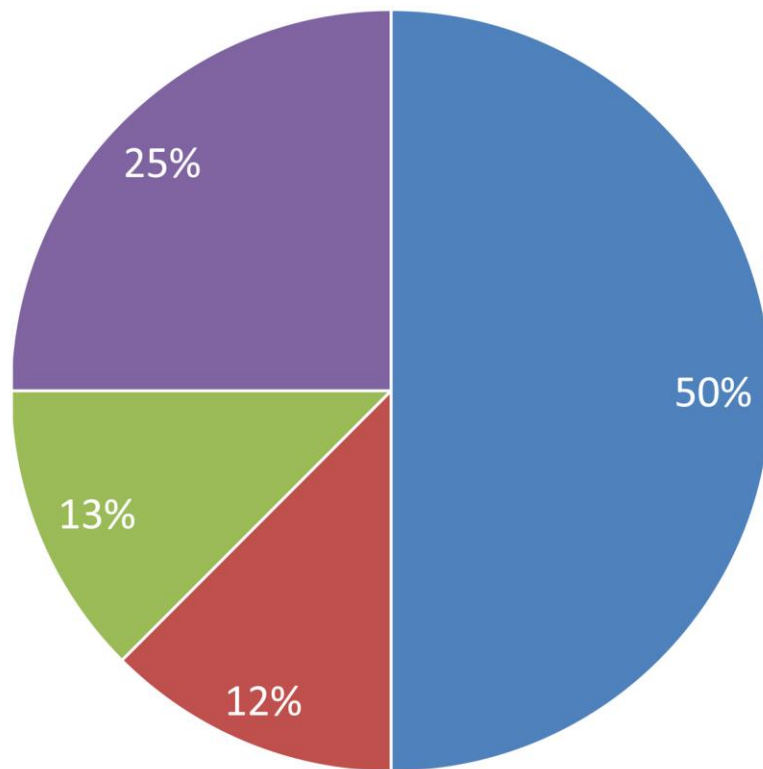

■ Industry Funding and/or Interest      ■ No Funding and Interest  
■ Non-Industry Funding and/or Interest      ■ Not reported in the manuscript

view only

**Table S1. Assessment of the studies' qualities using the Newcastle-Ottawa Scale.**

| Order | Study                     | Year | Country   | Selection | Comparability | Exposure | Quality Score |
|-------|---------------------------|------|-----------|-----------|---------------|----------|---------------|
| 1     | Cobb <i>et al</i>         | 2006 | UK        | ★★★★      | ★★            | ★★       | ★★★★★★★★      |
| 2     | Lonner <i>et al</i>       | 2010 | USA       | ★★★       | ★★            | ★        | ★★★★★★        |
| 3     | Hansen <i>et al</i>       | 2014 | USA       | ★★★       | ★             | ★        | ★★★★★         |
| 4     | Maccallum <i>et al</i>    | 2016 | USA       | ★★★       | ★★            | ★        | ★★★★★★        |
| 5     | Blyth <i>et al</i>        | 2017 | UK        | ★★★★      | ★★            | ★★       | ★★★★★★★★      |
| 6     | Gilmour <i>et al</i>      | 2018 | UK        | ★★★★      | ★★            | ★★       | ★★★★★★★★      |
| 7     | Kayani <i>et al</i>       | 2018 | UK        | ★★★       | ★★            | ★        | ★★★★★★        |
| 8     | Batailler <i>et al</i>    | 2018 | France    | ★★★       | ★             | ★        | ★★★★★         |
| 9     | Canetti <i>et al</i>      | 2018 | France    | ★★★       | ★             | ★        | ★★★★★         |
| 10    | Banger <i>et al</i>       | 2019 | UK        | ★★        | ★★            | ★★       | ★★★★★★        |
| 11    | Wong <i>et al</i>         | 2019 | USA       | ★★★       | ★             | ★        | ★★★★★         |
| 12    | Christina <i>et al</i>    | 2019 | USA       | ★★★       | ★             | ★        | ★★★★★         |
| 13    | Kayani <i>et al</i>       | 2019 | UK        | ★★★       | ★★            | ★        | ★★★★★★        |
| 14    | Vakharia <i>et al</i>     | 2019 | USA       | ★★★       | ★             | ★        | ★★★★★         |
| 15    | Mergenthaler <i>et al</i> | 2020 | France    | ★★★       | ★             | ★        | ★★★★★         |
| 16    | St Mart <i>et al</i>      | 2020 | Australia | ★★★       | ★             | ★        | ★★★★★         |

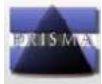

# PRISMA 2009 Checklist

| Section/topic                      | #  | Checklist item                                                                                                                                                                                                                                                                                              | Reported on page # |
|------------------------------------|----|-------------------------------------------------------------------------------------------------------------------------------------------------------------------------------------------------------------------------------------------------------------------------------------------------------------|--------------------|
| <b>TITLE</b>                       |    | <b>Does robotic- assisted unicompartmental knee arthroplasty have lower complication and revision rates than the conventional procedure? A Systematic Review and Meta-Analysis</b>                                                                                                                          | <b>1</b>           |
| Title                              | 1  | Identify the report as a systematic review, meta-analysis, or both.                                                                                                                                                                                                                                         | 1                  |
| <b>ABSTRACT</b>                    |    |                                                                                                                                                                                                                                                                                                             |                    |
| Structured summary                 | 2  | Provide a structured summary including, as applicable: background; objectives; data sources; study eligibility criteria, participants, and interventions; study appraisal and synthesis methods; results; limitations; conclusions and implications of key findings; systematic review registration number. | 2                  |
| <b>INTRODUCTION</b>                |    |                                                                                                                                                                                                                                                                                                             |                    |
| Rationale                          | 3  | Describe the rationale for the review in the context of what is already known.                                                                                                                                                                                                                              | 3                  |
| Objectives                         | 4  | Provide an explicit statement of questions being addressed with reference to participants, interventions, comparisons, outcomes, and study design (PICOS).                                                                                                                                                  | 4                  |
| <b>METHODS</b>                     |    |                                                                                                                                                                                                                                                                                                             |                    |
| Protocol and registration          | 5  | Indicate if a review protocol exists, if and where it can be accessed (e.g., Web address), and, if available, provide registration information including registration number.                                                                                                                               | Not exist          |
| Eligibility criteria               | 6  | Specify study characteristics (e.g., PICOS, length of follow-up) and report characteristics (e.g., years considered, language, publication status) used as criteria for eligibility, giving rationale.                                                                                                      | 4                  |
| Information sources                | 7  | Describe all information sources (e.g., databases with dates of coverage, contact with study authors to identify additional studies) in the search and date last searched.                                                                                                                                  | 4                  |
| Search                             | 8  | Present full electronic search strategy for at least one database, including any limits used, such that it could be repeated.                                                                                                                                                                               | 4                  |
| Study selection                    | 9  | State the process for selecting studies (i.e., screening, eligibility, included in systematic review, and, if applicable, included in the meta-analysis).                                                                                                                                                   | 4                  |
| Data collection process            | 10 | Describe method of data extraction from reports (e.g., piloted forms, independently, in duplicate) and any processes for obtaining and confirming data from investigators.                                                                                                                                  | 4                  |
| Data items                         | 11 | List and define all variables for which data were sought (e.g., PICOS, funding sources) and any assumptions and simplifications made.                                                                                                                                                                       | 4                  |
| Risk of bias in individual studies | 12 | Describe methods used for assessing risk of bias of individual studies (including specification of whether this was done at the study or outcome level), and how this information is to be used in any data synthesis.                                                                                      | 5                  |
| Summary measures                   | 13 | State the principal summary measures (e.g., risk ratio, difference in means).                                                                                                                                                                                                                               | 5                  |
| Synthesis of results               | 14 | Describe the methods of handling data and combining results of studies, if done, including measures of consistency (e.g., I <sup>2</sup> ) for each meta-analysis.                                                                                                                                          | 5                  |

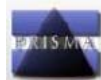

# PRISMA 2009 Checklist

Page 1 of 2

| Section/topic                 | #  | Checklist item                                                                                                                                                                                           | Reported on page # |
|-------------------------------|----|----------------------------------------------------------------------------------------------------------------------------------------------------------------------------------------------------------|--------------------|
| Risk of bias across studies   | 15 | Specify any assessment of risk of bias that may affect the cumulative evidence (e.g., publication bias, selective reporting within studies).                                                             | 5                  |
| Additional analyses           | 16 | Describe methods of additional analyses (e.g., sensitivity or subgroup analyses, meta-regression), if done, indicating which were pre-specified.                                                         | Not done           |
| <b>RESULTS</b>                |    |                                                                                                                                                                                                          |                    |
| Study selection               | 17 | Give numbers of studies screened, assessed for eligibility, and included in the review, with reasons for exclusions at each stage, ideally with a flow diagram.                                          | 5-6                |
| Study characteristics         | 18 | For each study, present characteristics for which data were extracted (e.g., study size, PICOS, follow-up period) and provide the citations.                                                             | 7                  |
| Risk of bias within studies   | 19 | Present data on risk of bias of each study and, if available, any outcome level assessment (see item 12).                                                                                                | 10                 |
| Results of individual studies | 20 | For all outcomes considered (benefits or harms), present, for each study: (a) simple summary data for each intervention group (b) effect estimates and confidence intervals, ideally with a forest plot. | 9                  |
| Synthesis of results          | 21 | Present results of each meta-analysis done, including confidence intervals and measures of consistency.                                                                                                  | 9                  |
| Risk of bias across studies   | 22 | Present results of any assessment of risk of bias across studies (see Item 15).                                                                                                                          | 10                 |
| Additional analysis           | 23 | Give results of additional analyses, if done (e.g., sensitivity or subgroup analyses, meta-regression [see Item 16]).                                                                                    | 10                 |
| <b>DISCUSSION</b>             |    |                                                                                                                                                                                                          |                    |
| Summary of evidence           | 24 | Summarize the main findings including the strength of evidence for each main outcome; consider their relevance to key groups (e.g., healthcare providers, users, and policy makers).                     | 10-11              |
| Limitations                   | 25 | Discuss limitations at study and outcome level (e.g., risk of bias), and at review-level (e.g., incomplete retrieval of identified research, reporting bias).                                            | 12-13              |
| Conclusions                   | 26 | Provide a general interpretation of the results in the context of other evidence, and implications for future research.                                                                                  | 13                 |
| <b>FUNDING</b>                |    |                                                                                                                                                                                                          |                    |
| Funding                       | 27 | Describe sources of funding for the systematic review and other support (e.g., supply of data); role of funders for the systematic review.                                                               | 13                 |

From: Moher D, Liberati A, Tetzlaff J, Altman DG, The PRISMA Group (2009). Preferred Reporting Items for Systematic Reviews and Meta-Analyses: The PRISMA Statement. PLoS Med 6(7): e1000097. doi:10.1371/journal.pmed1000097

For more information, visit: [www.prisma-statement.org](http://www.prisma-statement.org).



# BMJ Open

## Does robotic-assisted unicompartmental knee arthroplasty have lower complication and revision rates than the conventional procedure? A systematic review and meta-analysis

|                                 |                                                                                                                                                                                                                                                                                                                                       |
|---------------------------------|---------------------------------------------------------------------------------------------------------------------------------------------------------------------------------------------------------------------------------------------------------------------------------------------------------------------------------------|
| Journal:                        | <i>BMJ Open</i>                                                                                                                                                                                                                                                                                                                       |
| Manuscript ID                   | bmjopen-2020-044778.R2                                                                                                                                                                                                                                                                                                                |
| Article Type:                   | Original research                                                                                                                                                                                                                                                                                                                     |
| Date Submitted by the Author:   | 05-Jul-2021                                                                                                                                                                                                                                                                                                                           |
| Complete List of Authors:       | Sun, Yifeng; First Affiliated Hospital of Shandong First Medical University<br>Liu, Wei; First Affiliated Hospital of Shandong First Medical University<br>Hou, Jian<br>Hu, Xiuhua; First Affiliated Hospital of Shandong First Medical University<br>Zhang, Wenqiang; First Affiliated Hospital of Shandong First Medical University |
| <b>Primary Subject Heading</b>: | Surgery                                                                                                                                                                                                                                                                                                                               |
| Secondary Subject Heading:      | Surgery                                                                                                                                                                                                                                                                                                                               |
| Keywords:                       | Orthopaedic & trauma surgery < SURGERY, Adult surgery < SURGERY, Knee < ORTHOPAEDIC & TRAUMA SURGERY, Adult orthopaedics < ORTHOPAEDIC & TRAUMA SURGERY                                                                                                                                                                               |
|                                 |                                                                                                                                                                                                                                                                                                                                       |

SCHOLARONE™  
Manuscripts



I, the Submitting Author has the right to grant and does grant on behalf of all authors of the Work (as defined in the below author licence), an exclusive licence and/or a non-exclusive licence for contributions from authors who are: i) UK Crown employees; ii) where BMJ has agreed a CC-BY licence shall apply, and/or iii) in accordance with the terms applicable for US Federal Government officers or employees acting as part of their official duties; on a worldwide, perpetual, irrevocable, royalty-free basis to BMJ Publishing Group Ltd ("BMJ") its licensees and where the relevant Journal is co-owned by BMJ to the co-owners of the Journal, to publish the Work in this journal and any other BMJ products and to exploit all rights, as set out in our [licence](#).

The Submitting Author accepts and understands that any supply made under these terms is made by BMJ to the Submitting Author unless you are acting as an employee on behalf of your employer or a postgraduate student of an affiliated institution which is paying any applicable article publishing charge ("APC") for Open Access articles. Where the Submitting Author wishes to make the Work available on an Open Access basis (and intends to pay the relevant APC), the terms of reuse of such Open Access shall be governed by a Creative Commons licence – details of these licences and which [Creative Commons](#) licence will apply to this Work are set out in our licence referred to above.

Other than as permitted in any relevant BMJ Author's Self Archiving Policies, I confirm this Work has not been accepted for publication elsewhere, is not being considered for publication elsewhere and does not duplicate material already published. I confirm all authors consent to publication of this Work and authorise the granting of this licence.

1  
2  
3  
4 Does robotic-assisted unicompartmental knee arthroplasty have lower  
5  
6 complication and revision rates than the conventional procedure? A  
7  
8  
9 systematic review and meta-analysis  
10

11 Yifeng Sun<sup>1</sup>, Wei Liu<sup>1</sup>, Jian Hou<sup>2</sup>, Xiuhua Hu<sup>1</sup>, Wenqiang Zhang<sup>1,\*</sup>  
12

13 <sup>1</sup>Department of Orthopedic Surgery, The First Affiliated Hospital of Shandong First Medical  
14 University & Shandong Provincial Qianfoshan Hospital, Shandong Key Laboratory of Rheumatic  
15 Disease and Translational Medicine  
16  
17

18 <sup>2</sup>Jimo Traditional Chinese Hospital, Qingdao, Shandong 266200, PR China  
19

20  
21 \*Correspondence and requests for materials should be addressed to Wenqiang Zhang  
22  
23 ([qfszwq@sina.com](mailto:qfszwq@sina.com)).  
24  
25  
26  
27  
28  
29  
30  
31  
32  
33  
34  
35  
36  
37  
38  
39  
40  
41  
42  
43  
44  
45  
46  
47  
48  
49  
50  
51  
52  
53  
54  
55  
56  
57  
58  
59  
60

## Abstract

**Objective:** We conducted this systematic review and meta-analysis of studies on patients who underwent unicompartmental knee arthroplasty (UKA) to compare the complication rates, revision rates, and non-implant-specific complications between robotic-assisted and conventional UKA.

**Design:** Systematic review and meta-analysis.

**Data sources:** The PubMed, Embase, Web of Science, and Cochrane databases were searched up to 30 June 2020.

**Eligibility criteria:** Case-control studies comparing robotic-assisted and conventional UKA.

**Data extraction and synthesis:** Data from all eligible articles were independently extracted by two authors. We analysed the differences in outcomes between robotic-assisted and conventional UKA by calculating the corresponding 95% confidence intervals (CIs) and pooled relative risks (RRs). Heterogeneity was assessed using the chi-square and I-square tests. All analyses were performed using the 'metafor' package of R 3.6.2 software.

**Results:** A total of 16 studies involving 50,024 patients were included in the final meta-analysis. We found that robotic-assisted UKA had fewer complications (RR: 0.52, 95% CI: 0.28-0.96, P=0.036) and lower revision rates (RR: 0.42, 95% CI: 0.20-0.86, P=0.017) than conventional UKA. We observed no significant differences in non-implant-specific complications between the two surgical techniques (RR: 0.80, 95% CI: 0.61-1.04, P=0.96). No publication bias was found in this meta-analysis.

**Conclusions:** This study provides evidence that robotic-assisted UKA has fewer complications and lower revision rates than conventional UKA; however, owing to important limitations, the results lack reliability, and more studies are required.

### Strengths and limitations of this study

- We conducted a meta-analysis to find the best evidence comparing robotic-arm-assisted and manual unicompartmental knee arthroplasty (UKA).
- Long-term complications and revision rates depend on the follow-up duration; however, all included studies had a short follow-up period (3-60 months). Hence, the data on revision rates are not reliable.

1  
2  
3  
4 ▶ Some studies were not randomised controlled trials and had a small sample size, which increase  
5 the possibility of publication bias.

6  
7 ▶ The relatively modest sample size might have caused an unavoidable risk of bias.

8  
9 ▶ Our results were not adjusted for other factors that could influence outcomes related to knee  
10 function, such as patient age and weight, anterior cruciate ligament status, soft-tissue balance, and  
11 composition and thickness of the polyethylene component.  
12  
13  
14

15  
16  
17 **Keywords:** Unicompartmental knee arthroplasty; Robotic-arm-assisted UKA; Conventional UKA;  
18 Meta-analysis.  
19  
20

21  
22  
23 **Abbreviations:** UKA, unicompartmental knee arthroplasty; RA-UKA, robotic-assisted  
24 unicompartmental knee arthroplasty; RCT, randomised controlled trial; PCT, prospective cohort  
25 trial; RR, relative risk; CI, confidence interval  
26  
27  
28

29 **PROSPERO registration number: CRD42021246927**  
30  
31

## 32 33 34 **Introduction**

35  
36 Unicompartmental knee arthroplasty (UKA) is often performed for treating isolated  
37 compartmental knee osteoarthritis owing to its minimally invasive nature and less bone resection  
38 required during surgery. However, higher rates of revision surgery (10-20%) have been reported in  
39 patients undergoing UKA than in those undergoing total knee arthroplasty<sup>1</sup>. There could be multiple  
40 reasons for the higher failure rate, including poor patient selection and component design, whereas  
41 some authors have identified malpositioning as the cause<sup>2</sup>. The use of robotic systems, which offer  
42 promising short-term radiological outcomes of implants and precision in bone cuts, during UKA  
43 has considerably increased. Currently, approximately 15-20% of UKA surgeries are being  
44 performed with the assistance of robotic systems, with improved clinical efficacy<sup>3</sup>. Most experts  
45 believe that robotic-assisted UKA provides significantly better component angle alignment  
46 accuracy and functional outcomes, as well as higher patient satisfaction, than conventional UKA.  
47  
48 However, there are considerable variations in the complication and revision rates reported in  
49 previous studies, which make it difficult to estimate the safety outcomes of the two surgical  
50  
51  
52  
53  
54  
55  
56  
57  
58  
59  
60

1  
2  
3 techniques<sup>4, 5</sup>.

4  
5 Previous meta-analyses have compared the effects and safety of robotic-assisted and  
6 conventional UKA. In a meta-analysis by Fu et al., it was reported that robotic-assisted UKA  
7 showed no decrease in the rate of adverse events compared with conventional UKA. However, few  
8 articles (only seven studies) were included in the meta-analysis, and the difference in the revision  
9 rates between the two techniques was not reported<sup>6</sup>. Another meta-analysis by Zhang et al.  
10 contradicted the conclusion about adverse events by Fu et al., reporting instead that robotic-assisted  
11 UKA could significantly reduce the rate of complications; however, the results were also subject to  
12 limitations in sample size and follow-up duration, which might influence the assessment of the  
13 difference in outcomes between robotic-assisted and conventional UKA<sup>4</sup>. Another recent meta-  
14 analysis did not reach a definitive conclusion about complications<sup>5</sup>. Therefore, we conducted this  
15 systematic review and meta-analysis of studies on patients who underwent UKA to compare the  
16 complication rates, revision rates, and non-implant-specific complications between robotic-assisted  
17 and conventional UKA. We hypothesized that there would be no obvious differences in  
18 complication and revision rates between the two techniques.

## 32 **Methods**

### 33 **Search strategy**

34  
35 We searched the PubMed, Web of Science, Embase, and Cochrane databases using  
36 combinations of the following keywords: ‘unicompartmental knee arthroplasty’, ‘UKA’,  
37 ‘conventional UKA’, ‘traditional UKA’, ‘manual UKA’, ‘robotic-assisted UKA’, ‘non-robotically  
38 assisted UKA’, ‘complications’, ‘adverse events’, and ‘revision’ (last updated on 30 June 2020).  
39 The references of the identified reports were also retrieved and reviewed to find other related studies.  
40 All studies were carefully and repeatedly evaluated. The study period, treatment information,  
41 hospital, and any additional inclusion criteria were used to identify duplicate or overlapping data.

### 42 **Inclusion and exclusion criteria**

43  
44 Studies that met the following criteria were considered eligible for inclusion in this study: (1)  
45 original studies about UKA, (2) studies that compared robotic-assisted and conventional UKA, (3)  
46 studies that provided controls and effective data (including randomised controlled trials [RCTs],  
47 prospective cohort trials, case-control studies, and retrospective comparative studies), and (4)  
48  
49  
50  
51  
52  
53  
54  
55  
56  
57  
58  
59  
60

1  
2  
3  
4 studies published in English. The exclusion criteria were as follows: (1) studies published as talks,  
5 reviews, digests, letters, commentaries, or case reports; (2) model-based or cadaver studies; (3)  
6 duplicate or overlapping studies; and (4) not case-control studies.  
7  
8

### 9 **Data extraction and quality assessment**

10  
11 The data from all eligible articles were independently extracted by two authors, who discussed  
12 any disagreements to reach a consensus. The data retrieved from each study included the first  
13 author's name, year of publication, country, methods, number of patients, follow-up duration,  
14 complications, revision rate, and non-implant-specific complications. Three experienced reviewers  
15 used the modified Newcastle-Ottawa quality assessment scale to evaluate the quality of the selected  
16 studies. A score of 9 was assigned to studies of superior quality, between 6 and 8 to high-quality  
17 studies, between 3 and 5 to moderate-quality studies, and <3 to low-quality studies<sup>7</sup>.  
18  
19  
20  
21  
22  
23  
24

### 25 **Statistical analysis**

26  
27 We analysed the differences in outcomes between robotic-assisted and conventional UKA by  
28 calculating the corresponding 95% confidence intervals (CIs) and pooled relative risks (RRs).  
29 Heterogeneity was assessed using the chi-square and I-square tests. Fixed-effect models were  
30 employed when there was no significant heterogeneity ( $I^2 \leq 50\%$ ,  $P > 0.10$ ); otherwise, a random-  
31 effects model was used to obtain the pooled effects among the included studies. Galbraith plots were  
32 used to detect potential sources of heterogeneity<sup>8</sup>. Normal quantile-quantile (Q-Q) plots were used  
33 to check for deviation of data from the CI. Outlier and influence analyses were performed by  
34 inspecting the plots for externally standardised residues, DFFITS values, Cook's distances,  
35 covariance ratios, estimates of  $\tau^2$ , test statistics for residual heterogeneity when each study was  
36 excluded in turn, hat values, and weights for each study included in the analysis<sup>9</sup>. Publication bias  
37 was assessed by inspecting a contour-enhanced funnel plot, with contours at 90%, 95%, and 99%  
38 CIs. All analyses were performed using the 'metafor' package of R 3.6.2 software<sup>10</sup>. A two-tailed P  
39 value of <0.05 was considered statistically significant.  
40  
41  
42  
43  
44  
45  
46  
47  
48  
49  
50  
51

### 52 **Patient and public involvement**

53  
54 There was no patient and public involvement in this systematic review.  
55

## 56 **Results**

### 57 **Study characteristics**

58  
59  
60

1  
2  
3  
4 We initially identified 374 studies through the search of the PubMed, Embase, Web of  
5 Science, and Cochrane databases. Of these, 322 studies did not meet the inclusion criteria and  
6 were excluded after reviewing the titles and abstracts. Of the 52 remaining studies that were  
7 subjected to a full-text review, 28 were excluded because they were not comparative studies. In  
8 addition, eight full-text articles were excluded for the following reasons: (1) data were  
9 incomparable or incomplete and (2) data about complications were not available. Finally, 16  
10 studies involving 50,024 patients were included in the final meta-analysis. The flow diagram of  
11 study selection is presented in Figure 1. Table 1 summarises the main characteristics of the 16  
12 included studies. The quality assessment of the included studies is presented in detail in the  
13 Supplementary Material, and all the studies were evaluated as being of moderate to high quality  
14 (Table S1).  
15  
16  
17  
18  
19  
20  
21  
22  
23  
24  
25  
26  
27  
28  
29  
30  
31  
32  
33  
34  
35  
36  
37  
38  
39  
40  
41  
42  
43  
44  
45  
46  
47  
48  
49  
50  
51  
52  
53  
54  
55  
56  
57  
58  
59  
60



**Table 1. Main characteristics of all articles included in the meta-analysis**

| Order | Study                                   | Year | Country | Design                  | No.knees<br>RA-UKA | Follow-up<br>(Month) | Complicati<br>on | Revision | Robot<br>Systems                       | Function scoring system                    |
|-------|-----------------------------------------|------|---------|-------------------------|--------------------|----------------------|------------------|----------|----------------------------------------|--------------------------------------------|
| 1     | Cobb <i>et al</i> <sup>11</sup>         | 2006 | UK      | RCT                     | 19<br>15           | 4.5M                 | 1<br>2           | NULL     | Acrobot system<br>(Acrobot Co.)        | AKSS, WOMAC                                |
| 2     | Lonner <i>et al</i> <sup>3</sup>        | 2010 | USA     | PCT                     | 31<br>27           | 3 M                  | 1<br>0           | NULL     | Tactile Guidance<br>System (MAKO Co.)  | NULL                                       |
| 3     | Hansen <i>et al</i> <sup>12</sup>       | 2014 | USA     | Case control            | 30<br>32           | 24M                  | 7<br>3           | 0<br>1   | RIO™ System<br>(MAKO Co.)              | Recovery time<br>First, Ambulation         |
| 4     | Maccallum<br><i>et al</i> <sup>13</sup> | 2016 | USA     | PCT                     | 87<br>177          | 32.4M                | 3<br>7           | 3<br>7   | RIO™ System<br>( Stryker Mako)         | NULL                                       |
| 5     | Blyth <i>et al</i> <sup>14</sup>        | 2017 | UK      | RCT                     | 64<br>65           | 12M                  | 1<br>1           | NULL     | Acrobot system<br>(Acrobot Co.)        | AKSS,                                      |
| 6     | Gilmour <i>et al</i> <sup>15</sup>      | 2018 | UK      | RCT                     | 58<br>54           | 24M                  | 0<br>2           | 0<br>2   | RIO™ System<br>(MAKO Co.)              | AKSS,OKS,FJS<br>Pain VAS                   |
| 7     | Kayani <i>et al</i> <sup>16</sup>       | 2018 | UK      | PCT                     | 60<br>60           | 1M                   | 0<br>2           | NULL     | RIO™ System<br>(MAKO Co.)              | NULL                                       |
| 8     | Batailler <i>et al</i> <sup>17</sup>    | 2018 | France  | Case control            | 80<br>80           | 19.7M                | 4<br>7           | 4<br>7   | Navio system (Smith<br>and Nephew Co.) | IKSS                                       |
| 9     | Canetti <i>et al</i> <sup>18</sup>      | 2018 | France  | Retrospective<br>cohort | 11<br>17           | 39.3 M               | 0<br>1           | NULL     | Navio system (Smith<br>and Nephew Co.) | IKSS                                       |
| 10    | Banger <i>et al</i> <sup>19</sup>       | 2019 | UK      | RCT                     | 74<br>65           | 60M                  | 0<br>6           | 0<br>2   | RIO™ System<br>(MAKO Co.)              | AKSS, JFS, Pain VAS,<br>Stiffness, VAS,OKS |
| 11    | Wong <i>et al</i> <sup>20</sup>         | 2019 | USA     | Retrospective<br>cohort | 58<br>118          | 3M                   | 7<br>7           | 7<br>7   | RIO™ System<br>(MAKO Co.)              | SF-12, WOMAC, KSFS                         |

|    |                                         |      |           |                                 |                  |     |             |             |                                     |                                                                 |
|----|-----------------------------------------|------|-----------|---------------------------------|------------------|-----|-------------|-------------|-------------------------------------|-----------------------------------------------------------------|
| 12 | Cool <i>et al</i> <sup>21</sup>         | 2019 | USA       | Retrospective comparative study | 246<br>492       | 24M | 2<br>26     | 2<br>26     | NULL                                | NULL                                                            |
| 13 | Kayani <i>et al</i> <sup>22</sup>       | 2019 | UK        | PCT                             | 73<br>73         | 3M  | 0<br>2      | NULL        | RIO™ System (MAKO Co.)              | Pain scores, Opiate analgesia, Straight leg raise, Knee flexion |
| 14 | Vakharia <i>et al</i> <sup>23</sup>     | 2019 | USA       | Retrospective comparative study | 13,617<br>21,444 | 36M | 125<br>1327 | 125<br>1327 | NULL                                | NULL                                                            |
| 15 | Mergenthaler <i>et al</i> <sup>24</sup> | 2020 | France    | Case control                    | 200<br>191       | 24M | 19<br>34    | 8<br>21     | Navio system (Smith and Nephew Co.) | KSS score                                                       |
| 16 | St Mart <i>et al</i> <sup>25</sup>      | 2020 | Australia | Retrospective comparative study | 2851<br>9561     | 46M | 47<br>301   | 47<br>301   | Mako-assisted Restoris (MAKO Co.)   | NULL                                                            |

RA-UKA, robotic-assisted unicompartmental knee arthroplasty; RCT, randomised controlled trial; PCT, prospective cohort trial

## Complications

Complications that lead to failure of UKA include bearing dislocation, aseptic loosening, polyethylene wear, periprosthetic fracture, progression of arthritis to the contralateral compartment, infection, bone-implant impingement, retained cement debris in the joint, knee ankylosis, wound complications, deep haematoma, infection, thrombosis, persistent pain, pin-site infection and fracture, and other adverse events. All 16 studies reported data about complications, which mainly involved prosthetic loosening, subsidence, polyethylene bearing dislocation, periprosthetic fracture, knee ankylosis, wound complications, deep haematoma, infection, thrombosis, and persistent pain. The chi-square and I-square test results showed statistical heterogeneity between the included studies ( $P < 0.01$ ,  $I^2 = 87.1\%$ ), and Galbraith plots showed that no single study caused heterogeneity (Figure 2A). The plotted points were close to a sloped straight line on the Q-Q plot (Figure 2B), which showed that there was no significant deviation from the CI in the included studies. Therefore, a random-effects model was used for the analysis. We found that robotic-assisted UKA had a lower rate of complications than conventional UKA (RR: 0.52, 95% CI: 0.28-0.96,  $P=0.0366$ ; Figure 2C).

## Revision rate

Ten studies reported data about complications that required surgery in the two groups. The chi-square and I-square test results showed statistical heterogeneity among the included studies ( $P < 0.01$ ,  $I^2 = 90.3\%$ ), and Galbraith plots were used to determine the most heterogeneous studies; however, no studies were excluded (Figure 3A). As seen from the Q-Q plot, there was no significant deviation from the CI in the studies (Figure 3B). Data pooled using a random-effects model indicated that robotic-assisted UKA had a lower rate of revision surgery (RR: 0.42, 95% CI: 0.20-0.86,  $P=0.017$ ; Figure 3C).

## Non-implant-specific complications

Non-implant-specific complications were reported in 10 studies, which mainly involved infection, knee ankylosis, wound complications, deep haematoma, infection, thrombosis, persistent pain, and pin-site infection and fracture in our meta-analysis. The chi-square and I-square test results indicated no statistical heterogeneity among the included studies ( $P=0.49$ ,  $I^2=0.00\%$ ), and Galbraith plots (Figure 4A) and Q-Q plots (Figure 4B) also showed no statistical heterogeneity. We observed no significant differences in non-implant-specific complications between the two groups in comparisons using a fixed-effects model (RR: 0.80, 95% CI: 0.61-1.04,  $P=0.96$ ; Figure 4C).

### Publication bias

We assessed publication bias using Begg's test<sup>26</sup>. The contour-enhanced funnel plot for the meta-analysis of complications of robotic-assisted versus conventional UKA was largely symmetric ( $P_{\text{Begg}}=0.96$ ; Figure 5A). Similar results were observed for the revision rate ( $P_{\text{Begg}}=0.78$ ; Figure 5B) and non-implant-specific complications ( $P_{\text{Begg}}=1.16$ ; Figure 5C).

### Outlier and influence analyses

The presence of outliers and influential studies can affect the validity and robustness of conclusions from a meta-analysis. Figure 5 shows the standardised residuals (rstudent), DFFITS (dffits), Cook's distances (cook.d), covariance ratios (cov.r), estimates of  $\tau^2$  (tau2.del), and test statistics (QE.del) for the random-effects model that was used for the analysis of complications (Figure 6). The study by Vakharia et al. was identified as a potential outlier that led to heterogeneity and seemed to be an influential study. As the study had a large sample size (35,061 patients, robotic-assisted=13,617; conventional=21,444), making it useful for analysing national trends, and the hat values and weights showed that this study comprised the largest proportion of patients in the meta-analysis, it was not excluded from the meta-analysis. A similar result was observed in the analysis of the revision rate. No outlier was included in the analysis of non-implant-specific complications.

### Discussion

For more than 50 years, UKA has been performed to treat isolated compartmental knee arthritis. Despite many years of experience in performing UKA, some studies have reported that UKA has higher rates of failure than total knee arthroplasty<sup>27</sup>. Newly designed robotic-assisted systems are believed to increase the precision and accuracy of UKA, possibly leading to fewer complications and lower revision rates<sup>28</sup>. Many studies have evaluated the complications of robotic-assisted UKA; however, there are few studies on the complications of robotic-assisted UKA compared with those with conventional UKA. Researchers have reported conflicting results about the complication rates between robotic-assisted and conventional UKA. Hansen et al. and Blyth et al. did not find a significant difference in the rate of complications between the two techniques<sup>12,14</sup>. Wong et al. found that the robotic-arm-assisted arthroplasty cohort had a higher early revision rate than the conventional group, whereas other studies reported that robotic-assisted UKA had fewer complications and lower revision rates than conventional UKA<sup>20,23,25</sup>. It is important to assess the

1  
2  
3 complications of this new technology before it can be widely used<sup>21</sup>. Therefore, we conducted this  
4 systematic review and meta-analysis to compare the complication rates, revision rates, and non-  
5 implant-specific complications between robotic-assisted and conventional UKA. The main finding  
6 of our meta-analysis was that robotic-assisted UKA has fewer complications and lower revision  
7 rates than conventional UKA; however, there were no significant differences in non-implant-  
8 specific complications. Thus, our study confirms that robotic-assisted UKA has fewer complications  
9 and lower revision rates than the conventional procedure.  
10  
11

12  
13  
14  
15  
16  
17 Many studies have explored the relationship between the component position and its impact  
18 on implant survival and patient satisfaction<sup>29,30</sup>. Some authors believe that a reduction in alignment  
19 errors of these components will ultimately affect implant function or survival<sup>31</sup>. Some studies  
20 confirmed that the proportion of patients with tibial and femoral component implantation within 2°  
21 of the target position was significantly greater in the group that underwent robotic-assisted UKA,  
22 resulting in better long-term clinical scores and a lower implant failure rate<sup>13, 32, 33</sup>. Therefore, it  
23 could be inferred that the use of a robotic-assisted system in UKA can reduce implantation errors,  
24 leading to fewer complications and lower rates of revision surgery than conventional UKA.  
25 Although non-implant-specific complications are likely to be related to the procedure, fewer  
26 complications were considered to be directly related to the comparative study itself<sup>11</sup>. Mergenthaler  
27 et al. reported no complications related to the use of the robotic system<sup>24</sup>. Pearle et al. suggested that  
28 no further rigid fixation device is necessary, which reduces potential complications such as infection,  
29 iatrogenic fractures, or soft-tissue injury caused by the weight and movement of the robot<sup>34</sup>.  
30 However, there were no significant differences in non-implant-specific complications between the  
31 two techniques in our meta-analysis. Therefore, there is no evidence that the use of robotic systems  
32 can add to the non-implant-specific complications of UKA.  
33  
34  
35  
36  
37  
38  
39  
40  
41  
42  
43  
44  
45  
46  
47

48 Although robotic-assisted UKA is widely performed and is the current trend in orthopaedic  
49 surgery, it has some shortcomings. Robotic-assisted UKA was found to significantly prolong the  
50 duration of surgery compared with conventional UKA (Figure S1). Some studies have also  
51 documented that robotic-arm-assisted UKA has a higher cost<sup>35, 36</sup>. In addition, the device-related  
52 complications, such as pin-site fracture and infection, are non-negligible. We checked all articles  
53 included in the meta-analysis for a statement on funding or conflicts of interest related to the work.  
54 When such a statement was provided, we categorised the study as an industry-funded study or  
55  
56  
57  
58  
59  
60

1  
2  
3  
4 involving authors with financial conflicts of interest. We found that the included articles were more  
5 likely to be industry funded or written by authors with financial conflicts of interest (Figure S2).  
6  
7 Therefore, this information should not be overlooked, and more large-scale, non-commercially  
8 supported studies evaluating the efficacy of the two treatments in this patient population are needed  
9  
10 in the future.  
11  
12

13  
14  
15 This meta-analysis has several limitations. First, long-term revision rates depend on the duration of  
16 follow-up; however, all included studies had a short follow-up period (3-60 months). Hence, the  
17 data on revision rates are not reliable. Future studies with a longer follow-up duration, preferably  
18 10 years, are necessary to assess complications and revision rates. Second, some studies were not  
19 RCTs and had a small sample size, which increase the possibility of publication bias. Therefore, our  
20 results should be further confirmed by large-scale RCTs. Third, the types of robotic-assisted UKA  
21 performed in each study were different, as shown in Table 1. The different types of robotic systems  
22 used were the Acrobot, RIO™ or Mako-assisted Restoris, and Navio systems. Rapid advances in  
23 robotic-assisted technology have led to improvements in UKA over the past 10 years. Implant  
24 position, soft-tissue balance, and radiographic component alignment seem to have gradually  
25 improved with the development of robotic-assisted systems. Considering the evolution of this  
26 technology and its possible impact on outcomes, well-designed studies are necessary to advance the  
27 understanding of the impact of different robotic systems. Fourth, all included studies were limited  
28 to the English literature; therefore, some related studies published in other languages that might  
29 have met the inclusion criteria could have been missed. Fifth, most of the studies in our meta-  
30 analysis did not report pin-site and device-specific complications. Revision surgeries secondary to  
31 pin-site fracture were reported in some studies; however, the sample size was small. Therefore, we  
32 did not conduct a systematic analysis on these specific complications and revisions. Although we  
33 attempted to identify and retrieve all additional unpublished information, some missing data were  
34 inevitable. In addition, our results were not adjusted for other factors that could influence  
35 complications, such as patient age and weight, anterior cruciate ligament status, soft-tissue balance,  
36 and composition and thickness of the polyethylene component. Sixth, some of the included studies  
37 did not mention the reasons for loss to follow-up or lack details about revision surgery. However,  
38 these might have no effect on the analysis. Finally, when events such as complications and revisions  
39  
40  
41  
42  
43  
44  
45  
46  
47  
48  
49  
50  
51  
52  
53  
54  
55  
56  
57  
58  
59  
60

1  
2  
3 occur over a non-fixed period, it is common to use hazard ratios as the statistic of interest. As the  
4  
5 'metafor' package has no function for using hazard ratios as the statistic of interest, we used RRs as  
6  
7 the statistic of interest across all studies.  
8  
9

## 10 **Conclusions**

11  
12 To summarise, this meta-analysis study indicates that robotic-assisted UKA is associated with  
13  
14 fewer complications and lower rates of revision surgery than conventional UKA. No evidence  
15  
16 suggests that the use of robotic systems might increase the rate of non-implant-specific  
17  
18 complications of UKA.

19  
20 Therefore, the study provides evidence that robotic-assisted UKA has fewer complications and  
21  
22 lower revision rates than conventional UKA; however, owing to important limitations, the results  
23  
24 lack reliability, and more studies are required.  
25

## 26 **Acknowledgements**

27  
28 We thank the Shandong First Medical University for providing statistical and technical  
29  
30 assistance.  
31

## 32 **Author contributions**

33  
34 Yifeng Sun conceived the study and wrote the manuscript. Wenqiang Zhang analysed the data.  
35  
36 Wei Liu generated data. Xiuhua Hu and Jian Hou reviewed the manuscript.  
37  
38

## 39 **Funding sources**

40  
41 This work was supported by the Natural Science Foundation of China (81702667), Wu Jieping  
42  
43 Medical Foundation (320.6750.18466), and Shandong Provincial Key Research and Development  
44  
45 Project (GG201809250496).  
46

## 47 **Competing interests**

48  
49 The authors declare no conflicts of interest.  
50

## 51 **Patient consent for publication**

52  
53 Not required.  
54  
55

## 56 **Data sharing statement**

57  
58 All data relevant to the study are included in the article or uploaded as supplementary information.  
59  
60

## Ethics approval statement

This study is a systematic review and meta-analysis, there was no Ethics Committee(s) or Institutional Board(s) involvement in this study.

## References

1. Labek G, Sekyra K, Pawelka W, Janda W, Agreiter M, Schlichtherle R, Stöckl B, Krismer M: outcome And Reproducibility Of Data Concerning The Oxford Medial Unicompartmental Knee Arthroplasty *Orthopaedic Proceedings* 2011; 93:131-.
2. Lang J, Mannava S, Floyd A, Goddard M, Smith B, Mofidi A, M. Seyler T, Jinnah R. Robotic systems in orthopaedic surgery. *The Journal of bone and joint surgery British volume* 2011;93: 1296-9.
3. Lonner JH, Moretti VM. The Evolution of Image-Free Robotic Assistance in Unicompartmental Knee Arthroplasty. *American journal of orthopedics* 2016;45: 249-54.
4. Zhang F, Li H, Ba Z, Bo C, Li K. Robotic arm-assisted vs conventional unicompartmental knee arthroplasty: A meta-analysis of the effects on clinical outcomes. *Medicine* 2019;98.
5. Chin BZ, Tan SSH, Chua KCX, Budiono GR, Syn NL, Oneill GK. Robot-Assisted versus Conventional Total and Unicompartmental Knee Arthroplasty: A Meta-analysis of Radiological and Functional Outcomes. *Journal of Knee Surgery* 2020.
6. Fu J, Wang Y, Li X, Yu B, Ni M, Chai W, Hao L, Chen J. Robot-assisted vs. conventional unicompartmental knee arthroplasty : Systematic review and meta-analysis. *Orthopade* 2018;47: 1009-17.
7. Wells G: The Newcastle-Ottawa Scale (NOS) for Assessing the Quality of Non-Randomised Studies in Meta-Analyses *Symposium on Systematic Reviews: Beyond the Basics* 2014.
8. Galbraith RF. Some Applications of Radial Plots. *Journal of the American Statistical Association* 1994;89: 1232-42.
9. Viechtbauer W, Cheung MWL. Outlier and influence diagnostics for meta-analysis. *Research Synthesis Methods* 2010;1: 112-25.
10. Viechtbauer W. Conducting Meta-Analyses in R with the metafor Package. *Journal of Statistical Software* 2010;36: 1-48.
11. Cobb J, Henckel J, Gomes P, Harris S, Jakopec M, Rodriguez F, Barrett ARW, Davies BL. Hands-on robotic unicompartmental knee replacement - A prospective, randomised controlled study of the Acrobot system. *Journal of Bone and Joint Surgery-british Volume* 2006;88: 188-97.
12. Hansen DC, Kusuma SK, Palmer RM, Harris KB. Robotic Guidance Does Not Improve Component Position or Short-Term Outcome in Medial Unicompartmental Knee Arthroplasty. *Journal of Arthroplasty* 2014;29: 1784-9.
13. Maccallum KP, Danoff JR, Geller JA. Tibial baseplate positioning in robotic-assisted and conventional unicompartmental knee arthroplasty. *European Journal of Orthopaedic Surgery and Traumatology* 2016;26: 93-8.
14. Blyth M, Anthony I, Rowe P, Banger M, Maclean A, Jones B. Robotic arm-assisted versus conventional unicompartmental knee arthroplasty: Exploratory secondary analysis of a randomised controlled trial. *Bone and Joint Research* 2017;6: 631-9.
15. Gilmour A, Maclean A, Rowe P, Banger M, Donnelly I, Jones B, Blyth M. Robotic-Arm Assisted Versus Conventional Unicompartmental Knee Arthroplasty. The 2 year Clinical outcomes of a



1  
2  
3 Randomised Controlled Trial. *Journal of Arthroplasty* 2018; S0883540318301980.

4 16. Kayani, Konan, T JR, Pietrzak, S S, Huq, Tahmassebi, S F, Haddad. The learning curve associated  
5 with robotic-arm assisted unicompartmental knee arthroplasty. *Bone & Joint Journal* 2018.

6 17. Batailler C, White N, Ranaldi FM, Neyret P, Servien E, Lustig S. Improved implant position and  
7 lower revision rate with robotic-assisted unicompartmental knee arthroplasty. *Knee surgery, sports  
8 traumatology, arthroscopy : official journal of the ESSKA* 2019;**27**: 1232-40.

9 18. Canetti R, Batailler C, Bankhead C, Neyret P, Servien E, Lustig S. Faster return to sport after  
10 robotic-assisted lateral unicompartmental knee arthroplasty: a comparative study. *Archives of  
11 Orthopaedic and Trauma Surgery* 2018;**138**: 1765-71.

12 19. Banger M, Blyth M, Jones B, MacLean A, Rowe P, Glasgow NG, Clyde GU. 5 Year Results Of A  
13 Randomised Trial Of Robotic Arm Assisted Vs Manual Unicompartmental Knee Arthroplasty.

14 20. Wong J, Murtaugh T, Lakra A, Cooper HJ, Shah RP, Geller JA. Robotic-assisted  
15 unicompartmental knee replacement offers no early advantage over conventional unicompartmental  
16 knee replacement. *Knee Surgery, Sports Traumatology, Arthroscopy* 2019;**27**: 2303-8.

17 21. Cool CL, Needham K, Khlopas A, Mont MA. Revision Analysis of Robotic Arm-Assisted and  
18 Manual Unicompartmental Knee Arthroplasty. *Journal of Arthroplasty* 2019;**34**: 926-31.

19 22. Kayani B, Konan S, Tahmassebi J, Rowan FE, Haddad FS. An assessment of early functional  
20 rehabilitation and hospital discharge in conventional versus robotic-arm assisted unicompartmental  
21 knee arthroplasty. *Journal of Bone and Joint Surgery-british Volume* 2019: 24-33.

22 23. Vakharia RM, Sodhi N, Cohen-Levy WB, Vakharia AM, Mont MA, Roche MW. Comparison of  
23 Patient Demographics and Utilization Trends of Robotic-Assisted and Non-Robotic-Assisted  
24 Unicompartmental Knee Arthroplasty. *The journal of knee surgery* 2019.

25 24. Mergenthaler G, Batailler C, Lording T, Servien E, Lustig S. Is robotic-assisted unicompartmental  
26 knee arthroplasty a safe procedure? A case control study. *Knee surgery, sports traumatology,  
27 arthroscopy : official journal of the ESSKA* 2020.

28 25. St Mart JP, de Steiger RN, Cuthbert A, Donnelly W. The three-year survivorship of robotically  
29 assisted versus non-robotically assisted unicompartmental knee arthroplasty. *The bone & joint journal*  
30 **2020**;**102-B**: 319-28.

31 26. Macaskill P, Walter SD, Irwig L. A comparison of methods to detect publication bias in  
32 meta-analysis. *Statistics in medicine* 2001;**20**: 641-54.

33 27. Sun X, Su Z. A meta-analysis of unicompartmental knee arthroplasty revised to total knee  
34 arthroplasty versus primary total knee arthroplasty. *Journal of Orthopaedic Surgery and Research*  
35 **2018**;**13**: 158.

36 28. Roche MW. Robotic-assisted unicompartmental knee arthroplasty: the MAKO experience.  
37 *Clinics in Sports Medicine* 2014;**33**: 123-32.

38 29. Gromov K, Korchi M, Thomsen MG, Husted H, Troelsen A. What is the optimal alignment of  
39 the tibial and femoral components in knee arthroplasty? An overview of the literature. *Acta  
40 orthopaedica* 2014;**85**: 480-7.

41 30. Vandekerckhove P-J, Lanting B, Bellemans J, Victor J, MacDonald S. The current role of coronal  
42 plane alignment in total knee arthroplasty in a preoperative varus aligned population: an evidence  
43 based review. *Acta Orthop Belg* 2016;**82**: 129-42.

44 31. Kim KT, Lee S, Kim TW, Lee JS, Boo KH. The influence of postoperative tibiofemoral alignment  
45 on the clinical results of unicompartmental knee arthroplasty. *Knee surgery & related research* 2012;**24**:  
46 85.

1  
2  
3 32. Gromov K, Korchi M, Thomsen MG, Husted H, Troelsen A. What is the optimal alignment of  
4 the tibial and femoral components in knee arthroplasty. *Acta Orthopaedica* 2014;**85**: 480-7.

5  
6 33. Chatellard R, Sauleau V, Colmar M, Robert H, Raynaud G, Brilhault J. Medial unicompartmental  
7 knee arthroplasty: Does tibial component position influence clinical outcomes and arthroplasty survival?  
8 *Orthopaedics & Traumatology-surgery & Research* 2013;**99**.

9  
10 34. Pearle AD, Oloughlin PF, Kendoff D. Robot-Assisted Unicompartmental Knee Arthroplasty.  
11 *Journal of Arthroplasty* 2010;**25**: 230-7.

12  
13 35. Moschetti WE, Konopka JF, Rubash HE, Genuario JW. Can Robot-Assisted Unicompartmental  
14 Knee Arthroplasty Be Cost-Effective? A Markov Decision Analysis. *The Journal of arthroplasty* 2016;**31**:  
15 759-65.

16  
17 36. Sinha RK. Outcomes of robotic arm-assisted unicompartmental knee arthroplasty. *American*  
18 *journal of orthopedics (Belle Mead, NJ)* 2009;**38**: 20-2.

## 22 23 **Figure legends**

24  
25 Figure 1. Flow diagram depicting the study selection procedure.

26  
27 Figure 2. (A) Galbraith plot, (B) quantile-quantile (Q-Q) plot, and (C) forest plot for the comparison  
28 of complications between robotic-assisted and conventional unicompartmental knee arthroplasty.

29  
30 Figure 3. (A) Galbraith plot, (B) quantile-quantile (Q-Q) plot, and (C) forest plot for the comparison  
31 of revision rate between robotic-assisted and conventional unicompartmental knee arthroplasty.

32  
33 Figure 4. (A) Galbraith plot, (B) quantile-quantile (Q-Q) plot, and (C) forest plot for the comparison  
34 of non-implant-specific complications between robotic-assisted and conventional  
35 unicompartmental knee arthroplasty.

36  
37 Figure 5. Contour-enhanced funnel plots of the included studies showing no evidence of publication  
38 bias in complications (A), revision rate (B) and non-implant-specific complications (C).

39  
40 Figure 6. Outlier and influence analyses. The standardised residuals (rstudent), DFFITS (dffits),  
41 Cook's distances (cook.d), covariance ratios (cov.r), estimates of  $\tau^2$  (tau2.del), and test statistics  
42 (QE.del) for the random-effects model that was used for the analysis of the complications are shown.

43  
44 Figure S1. (A) Galbraith plot, (B) quantile-quantile (Q-Q) plot, and (C) forest plot for the  
45 comparison of surgical time between robotic-assisted and conventional unicompartmental knee  
46 arthroplasty.

47  
48 Figure S2. Industry funding and conflict of interest in studies on robotic-arm-assisted and  
49 conventional unicompartmental knee arthroplasty.

## Tables

Table 1. Main characteristics of all articles included in the meta-analysis

Table S1. Assessment of the quality of the included studies using the Newcastle-Ottawa scale

For peer review only

Figure 1. Literature search and study selection.



Figure 1. Flow diagram depicting the study selection procedure.

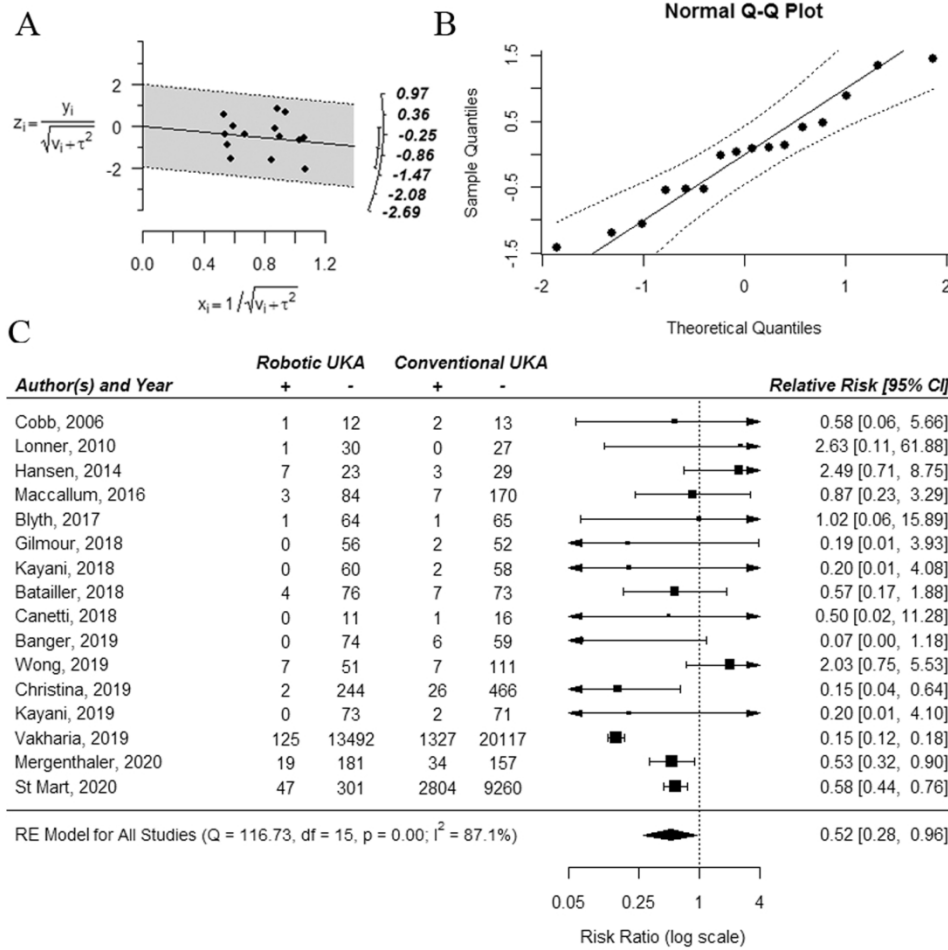

Figure 2. (A) Galbraith plot, (B) Quantile-Quantile (Q-Q) plot, and (C) Forest plot for the meta-analysis of complications between robotic-assisted and conventional unicompartamental knee arthroplasty.

79x78mm (600 x 600 DPI)

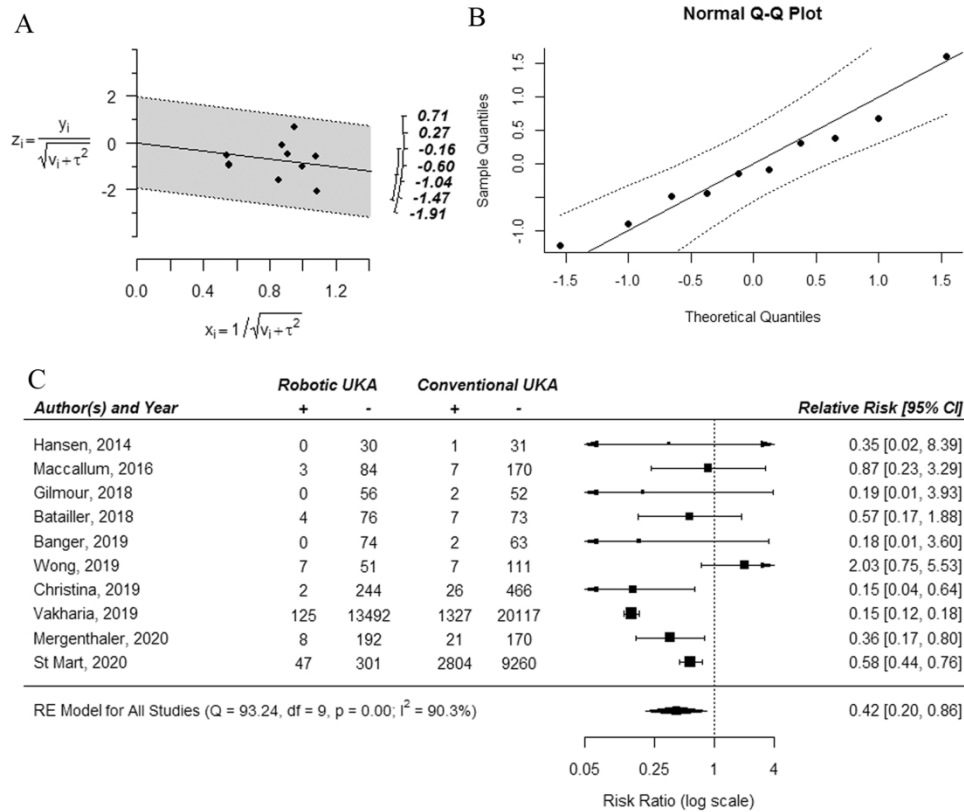

Figure 3. (A) Galbraith plot, (B) Quantile-Quantile (Q-Q) plot, and (C) Forest plot for the meta-analysis of revision rate between robotic-assisted and conventional unicompartmental knee arthroplasty.

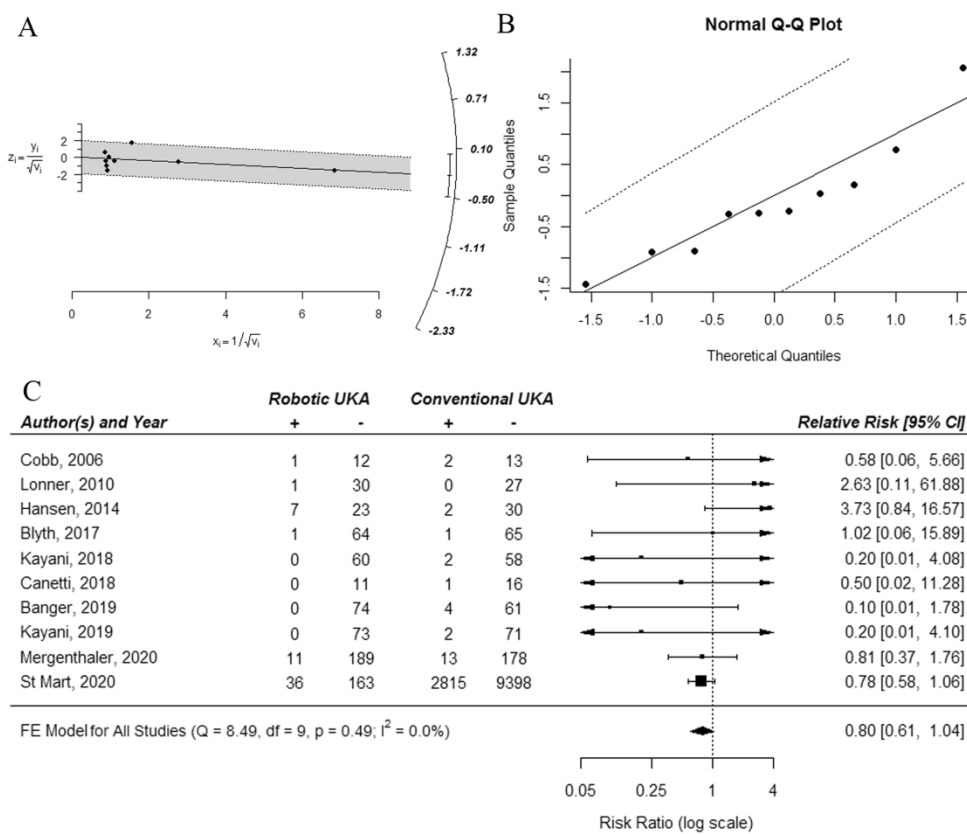

Figure 4. (A) Galbraith plot, (B) Quantile-Quantile (Q-Q) plot, and (C) Forest plot for the meta-analysis of non-implant specific complications between robotic-assisted and conventional unicompartmental knee arthroplasty.

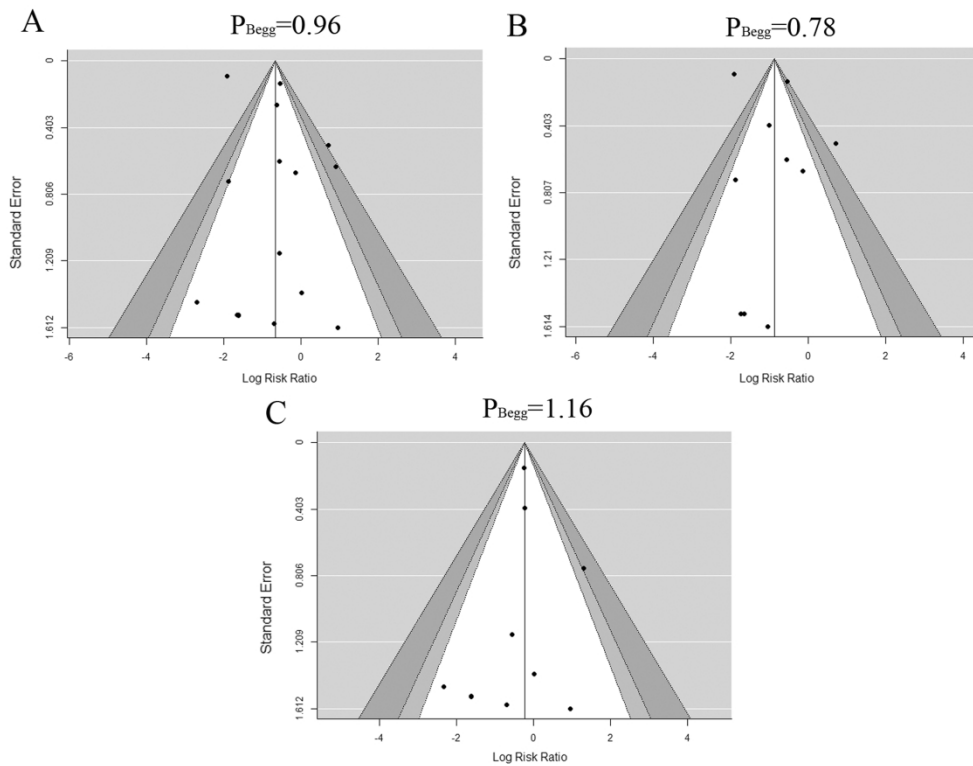

Figure 5. Contour-enhanced funnel plots of the included studies showing no evidence of publication bias in complications (A), revision rate (B) and non-implant specific complications (C).

150x118mm (600 x 600 DPI)



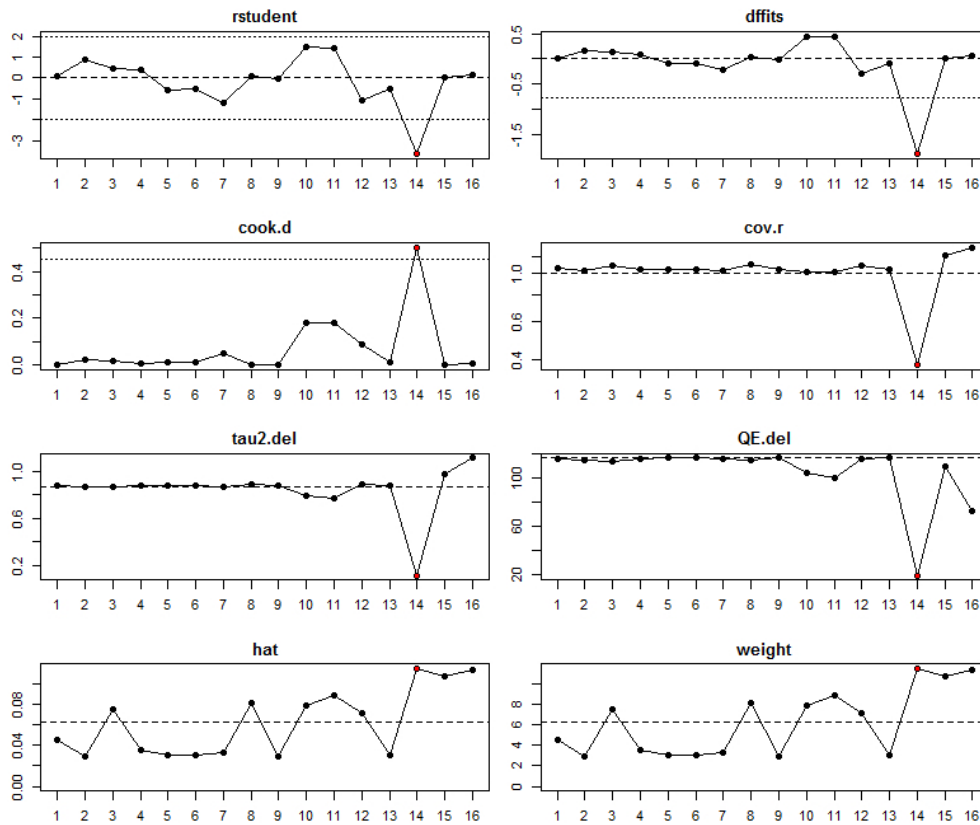

Figure 6. Outlier and influence analyses. The standardised residuals (rstudent), DFFITS (dffits), Cook's distances (cook.d), covariance ratios (cov.r), estimates of  $\tau^2$  (tau2.del) and test statistics (QE.del) for the random-effects model that was used for the analysis of the complications.

210x177mm (95 x 95 DPI)

**Table S1. Assessment of the studies' qualities using the Newcastle-Ottawa Scale.**

| Order | Studys                    | Year | Country   | Selection | Comparability | Exposure | Quality Score |
|-------|---------------------------|------|-----------|-----------|---------------|----------|---------------|
| 1     | <i>Cobb et al</i>         | 2006 | UK        | ★★★★      | ★★            | ★★       | ★★★★★★★★      |
| 2     | <i>Lonner et al</i>       | 2010 | USA       | ★★★       | ★★            | ★        | ★★★★★★        |
| 3     | <i>Hansen et al</i>       | 2014 | USA       | ★★★       | ★             | ★        | ★★★★★         |
| 4     | <i>Maccallum et al</i>    | 2016 | USA       | ★★★       | ★★            | ★        | ★★★★★★        |
| 5     | <i>Blyth et al</i>        | 2017 | UK        | ★★★★      | ★★            | ★★       | ★★★★★★★★      |
| 6     | <i>Gilmour et al</i>      | 2018 | UK        | ★★★★      | ★★            | ★★       | ★★★★★★★★      |
| 7     | <i>Kayani et al</i>       | 2018 | UK        | ★★★       | ★★            | ★        | ★★★★★★        |
| 8     | <i>Batailler et al</i>    | 2018 | France    | ★★★       | ★             | ★        | ★★★★★★        |
| 9     | <i>Canetti et al</i>      | 2018 | France    | ★★★       | ★             | ★        | ★★★★★★        |
| 10    | <i>Banger et al</i>       | 2019 | UK        | ★★        | ★★            | ★★       | ★★★★★★        |
| 11    | <i>Wong et al</i>         | 2019 | USA       | ★★★       | ★             | ★        | ★★★★★★        |
| 12    | <i>Christina et al</i>    | 2019 | USA       | ★★★       | ★             | ★        | ★★★★★★        |
| 13    | <i>Kayani et al</i>       | 2019 | UK        | ★★★       | ★★            | ★        | ★★★★★★        |
| 14    | <i>Vakharia et al</i>     | 2019 | USA       | ★★★       | ★             | ★        | ★★★★★★        |
| 15    | <i>Mergenthaler et al</i> | 2020 | France    | ★★★       | ★             | ★        | ★★★★★★        |
| 16    | <i>St Mart et al</i>      | 2020 | Australia | ★★★       | ★             | ★        | ★★★★★★        |



1  
2  
3  
4  
5  
6  
7  
8  
9  
10  
11  
12  
13  
14  
15  
16  
17  
18  
19  
20  
21  
22  
23  
24  
25  
26  
27  
28  
29  
30  
31  
32  
33  
34  
35  
36  
37  
38  
39  
40  
41  
42  
43  
44  
45  
46  
47  
48  
49  
50  
51  
52  
53  
54  
55  
56  
57  
58  
59  
60

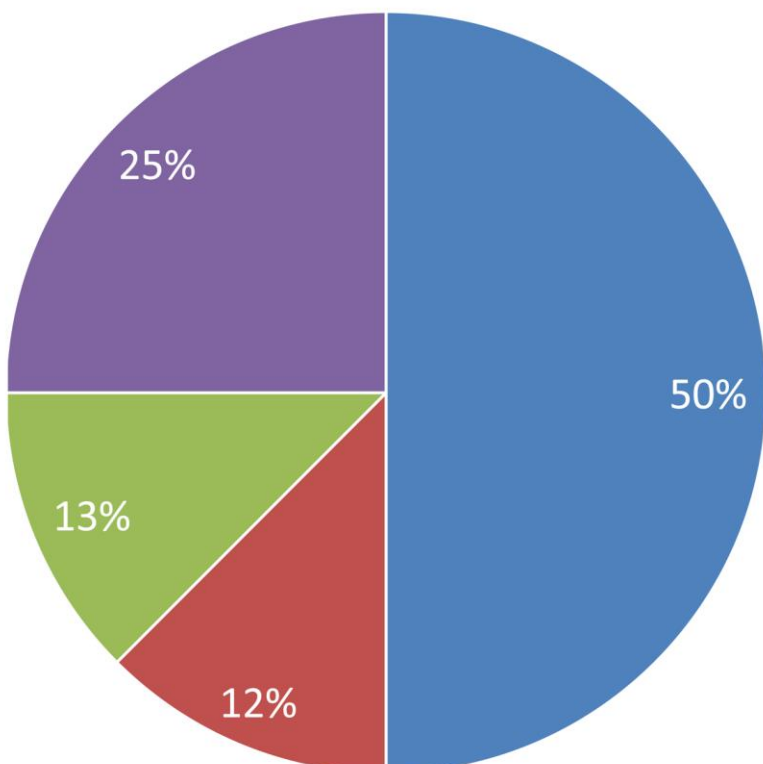

■ Industry Funding and/or Interest      ■ No Funding and Interest  
■ Non-Industry Funding and/or Interest      ■ Not reported in the manuscript

view only

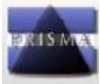

# PRISMA 2009 Checklist

| Section/topic                      | #  | Checklist item                                                                                                                                                                                                                                                                                              | Reported on page # |
|------------------------------------|----|-------------------------------------------------------------------------------------------------------------------------------------------------------------------------------------------------------------------------------------------------------------------------------------------------------------|--------------------|
| <b>TITLE</b>                       |    | <b>Does robotic- assisted unicompartmental knee arthroplasty have lower complication and revision rates than the conventional procedure? A Systematic Review and Meta-Analysis</b>                                                                                                                          | <b>1</b>           |
| Title                              | 1  | Identify the report as a systematic review, meta-analysis, or both.                                                                                                                                                                                                                                         | 1                  |
| <b>ABSTRACT</b>                    |    |                                                                                                                                                                                                                                                                                                             |                    |
| Structured summary                 | 2  | Provide a structured summary including, as applicable: background; objectives; data sources; study eligibility criteria, participants, and interventions; study appraisal and synthesis methods; results; limitations; conclusions and implications of key findings; systematic review registration number. | 2                  |
| <b>INTRODUCTION</b>                |    |                                                                                                                                                                                                                                                                                                             |                    |
| Rationale                          | 3  | Describe the rationale for the review in the context of what is already known.                                                                                                                                                                                                                              | 3                  |
| Objectives                         | 4  | Provide an explicit statement of questions being addressed with reference to participants, interventions, comparisons, outcomes, and study design (PICOS).                                                                                                                                                  | 4                  |
| <b>METHODS</b>                     |    |                                                                                                                                                                                                                                                                                                             |                    |
| Protocol and registration          | 5  | Indicate if a review protocol exists, if and where it can be accessed (e.g., Web address), and, if available, provide registration information including registration number.                                                                                                                               | Not exist          |
| Eligibility criteria               | 6  | Specify study characteristics (e.g., PICOS, length of follow-up) and report characteristics (e.g., years considered, language, publication status) used as criteria for eligibility, giving rationale.                                                                                                      | 4                  |
| Information sources                | 7  | Describe all information sources (e.g., databases with dates of coverage, contact with study authors to identify additional studies) in the search and date last searched.                                                                                                                                  | 4                  |
| Search                             | 8  | Present full electronic search strategy for at least one database, including any limits used, such that it could be repeated.                                                                                                                                                                               | 4                  |
| Study selection                    | 9  | State the process for selecting studies (i.e., screening, eligibility, included in systematic review, and, if applicable, included in the meta-analysis).                                                                                                                                                   | 4                  |
| Data collection process            | 10 | Describe method of data extraction from reports (e.g., piloted forms, independently, in duplicate) and any processes for obtaining and confirming data from investigators.                                                                                                                                  | 4                  |
| Data items                         | 11 | List and define all variables for which data were sought (e.g., PICOS, funding sources) and any assumptions and simplifications made.                                                                                                                                                                       | 4                  |
| Risk of bias in individual studies | 12 | Describe methods used for assessing risk of bias of individual studies (including specification of whether this was done at the study or outcome level), and how this information is to be used in any data synthesis.                                                                                      | 5                  |
| Summary measures                   | 13 | State the principal summary measures (e.g., risk ratio, difference in means).                                                                                                                                                                                                                               | 5                  |
| Synthesis of results               | 14 | Describe the methods of handling data and combining results of studies, if done, including measures of consistency (e.g., I <sup>2</sup> ) for each meta-analysis.                                                                                                                                          | 5                  |



# PRISMA 2009 Checklist

Page 1 of 2

| Section/topic                 | #  | Checklist item                                                                                                                                                                                           | Reported on page # |
|-------------------------------|----|----------------------------------------------------------------------------------------------------------------------------------------------------------------------------------------------------------|--------------------|
| Risk of bias across studies   | 15 | Specify any assessment of risk of bias that may affect the cumulative evidence (e.g., publication bias, selective reporting within studies).                                                             | 5                  |
| Additional analyses           | 16 | Describe methods of additional analyses (e.g., sensitivity or subgroup analyses, meta-regression), if done, indicating which were pre-specified.                                                         | Not done           |
| <b>RESULTS</b>                |    |                                                                                                                                                                                                          |                    |
| Study selection               | 17 | Give numbers of studies screened, assessed for eligibility, and included in the review, with reasons for exclusions at each stage, ideally with a flow diagram.                                          | 5-6                |
| Study characteristics         | 18 | For each study, present characteristics for which data were extracted (e.g., study size, PICOS, follow-up period) and provide the citations.                                                             | 7                  |
| Risk of bias within studies   | 19 | Present data on risk of bias of each study and, if available, any outcome level assessment (see item 12).                                                                                                | 10                 |
| Results of individual studies | 20 | For all outcomes considered (benefits or harms), present, for each study: (a) simple summary data for each intervention group (b) effect estimates and confidence intervals, ideally with a forest plot. | 9                  |
| Synthesis of results          | 21 | Present results of each meta-analysis done, including confidence intervals and measures of consistency.                                                                                                  | 9                  |
| Risk of bias across studies   | 22 | Present results of any assessment of risk of bias across studies (see Item 15).                                                                                                                          | 10                 |
| Additional analysis           | 23 | Give results of additional analyses, if done (e.g., sensitivity or subgroup analyses, meta-regression [see Item 16]).                                                                                    | 10                 |
| <b>DISCUSSION</b>             |    |                                                                                                                                                                                                          |                    |
| Summary of evidence           | 24 | Summarize the main findings including the strength of evidence for each main outcome; consider their relevance to key groups (e.g., healthcare providers, users, and policy makers).                     | 10-11              |
| Limitations                   | 25 | Discuss limitations at study and outcome level (e.g., risk of bias), and at review-level (e.g., incomplete retrieval of identified research, reporting bias).                                            | 12-13              |
| Conclusions                   | 26 | Provide a general interpretation of the results in the context of other evidence, and implications for future research.                                                                                  | 13                 |
| <b>FUNDING</b>                |    |                                                                                                                                                                                                          |                    |
| Funding                       | 27 | Describe sources of funding for the systematic review and other support (e.g., supply of data); role of funders for the systematic review.                                                               | 13                 |

From: Moher D, Liberati A, Tetzlaff J, Altman DG, The PRISMA Group (2009). Preferred Reporting Items for Systematic Reviews and Meta-Analyses: The PRISMA Statement. PLoS Med 6(7): e1000097. doi:10.1371/journal.pmed1000097

For more information, visit: [www.prisma-statement.org](http://www.prisma-statement.org).
