# Supplementary material for: Does robotic-assisted unicompartmental knee arthroplasty have lower complication and revision rates than the conventional procedure? A systematic review and meta-analysis
Source: PubMed Central journal article supplement — BMJ Open. 2021 Aug 11;11(8):e044778. doi: 10.1136/bmjopen-2020-044778 (PMC8359483; doi:10.1136/bmjopen-2020-044778), 2021-08-11
Supplement: bmjopen-2020-044778supp003.pdf [file bmjopen-2020-044778supp003.pdf]

**Table S1. Assessment of the studies' qualities using the Newcastle-Ottawa Scale.**

| Order | Studys                    | Year | Country   | Selection | Comparability | Exposure | Quality Score |
|-------|---------------------------|------|-----------|-----------|---------------|----------|---------------|
| 1     | Cobb <i>et al</i>         | 2006 | UK        | ★★★★★     | ★★            | ★★       | ★★★★★★★★★     |
| 2     | Lonner <i>et al</i>       | 2010 | USA       | ★★★       | ★★            | ★        | ★★★★★★★       |
| 3     | Hansen <i>et al</i>       | 2014 | USA       | ★★★       | ★             | ★        | ★★★★★★        |
| 4     | Maccallum <i>et al</i>    | 2016 | USA       | ★★★       | ★★            | ★        | ★★★★★★★       |
| 5     | Blyth <i>et al</i>        | 2017 | UK        | ★★★★★     | ★★            | ★★       | ★★★★★★★★★     |
| 6     | Gilmour <i>et al</i>      | 2018 | UK        | ★★★★★     | ★★            | ★★       | ★★★★★★★★★     |
| 7     | Kayani <i>et al</i>       | 2018 | UK        | ★★★       | ★★            | ★        | ★★★★★★        |
| 8     | Batailler <i>et al</i>    | 2018 | France    | ★★★       | ★             | ★        | ★★★★★★        |
| 9     | Canetti <i>et al</i>      | 2018 | France    | ★★★       | ★             | ★        | ★★★★★★        |
| 10    | Banger <i>et al</i>       | 2019 | UK        | ★★        | ★★            | ★★       | ★★★★★★★       |
| 11    | Wong <i>et al</i>         | 2019 | USA       | ★★★       | ★             | ★        | ★★★★★★        |
| 12    | Christina <i>et al</i>    | 2019 | USA       | ★★★       | ★             | ★        | ★★★★★★        |
| 13    | Kayani <i>et al</i>       | 2019 | UK        | ★★★       | ★★            | ★        | ★★★★★★★       |
| 14    | Vakharia <i>et al</i>     | 2019 | USA       | ★★★       | ★             | ★        | ★★★★★★        |
| 15    | Mergenthaler <i>et al</i> | 2020 | France    | ★★★       | ★             | ★        | ★★★★★★        |
| 16    | St Mart <i>et al</i>      | 2020 | Australia | ★★★       | ★             | ★        | ★★★★★★        |
