# Supplementary figures and images for: Does robotic-assisted unicompartmental knee arthroplasty have lower complication and revision rates than the conventional procedure? A systematic review and meta-analysis
Source: PubMed Central journal article supplement — BMJ Open. 2021 Aug 11;11(8):e044778. doi: 10.1136/bmjopen-2020-044778 (PMC8359483; doi:10.1136/bmjopen-2020-044778), 2021-08-11

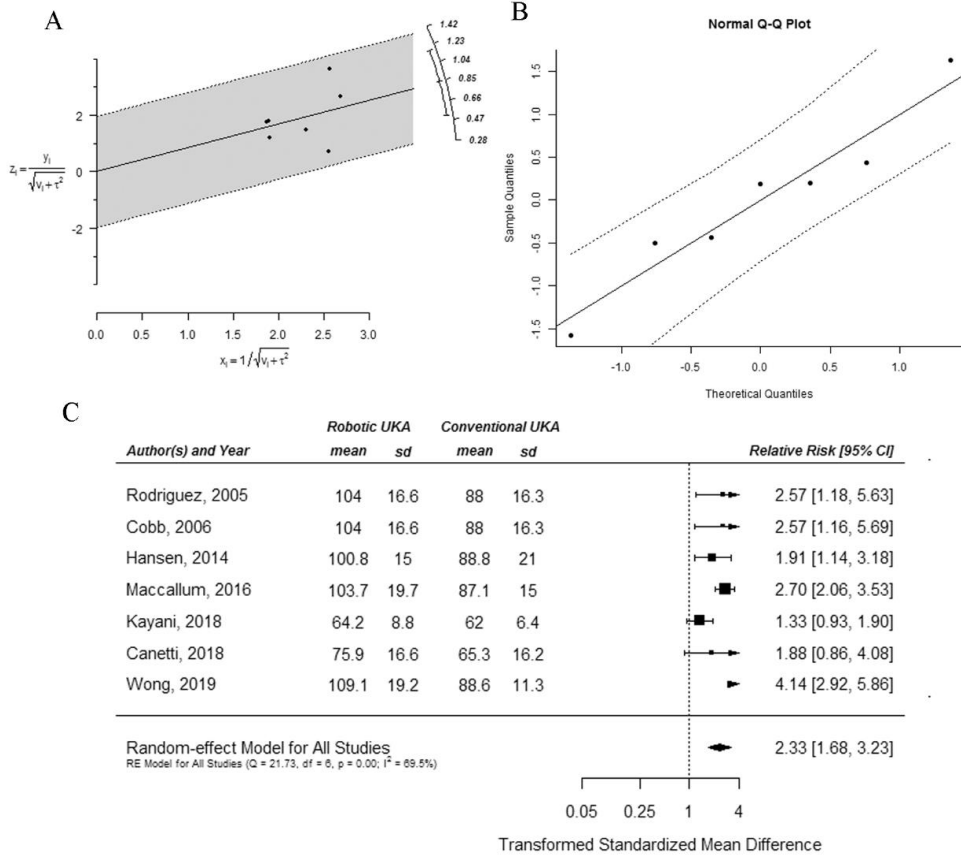

Supplement: bmjopen-2020-044778supp001.pdf [file bmjopen-2020-044778supp001.pdf]

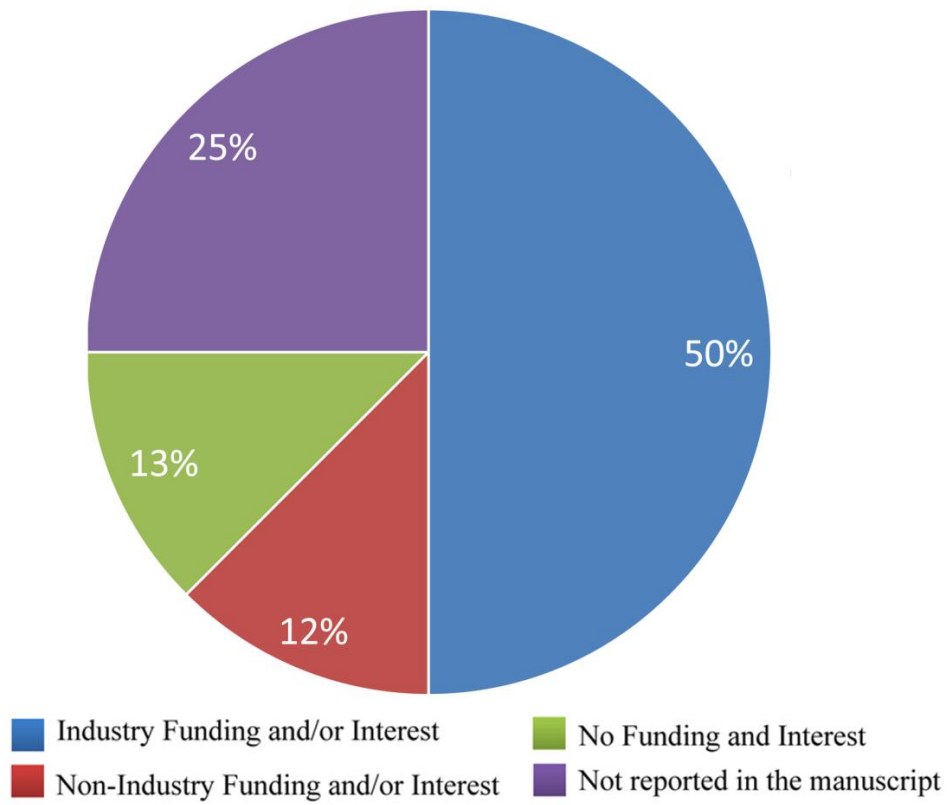

Supplement: bmjopen-2020-044778supp002.pdf [file bmjopen-2020-044778supp002.pdf]
