# Supplementary figures and images for: Does robotic-assisted unicompartmental knee arthroplasty have lower complication and revision rates than the conventional procedure? A systematic review and meta-analysis
Source: HighWire-hosted journal article supplement (doi:10.1136/bmjopen-2020-044778), 2021-08-01

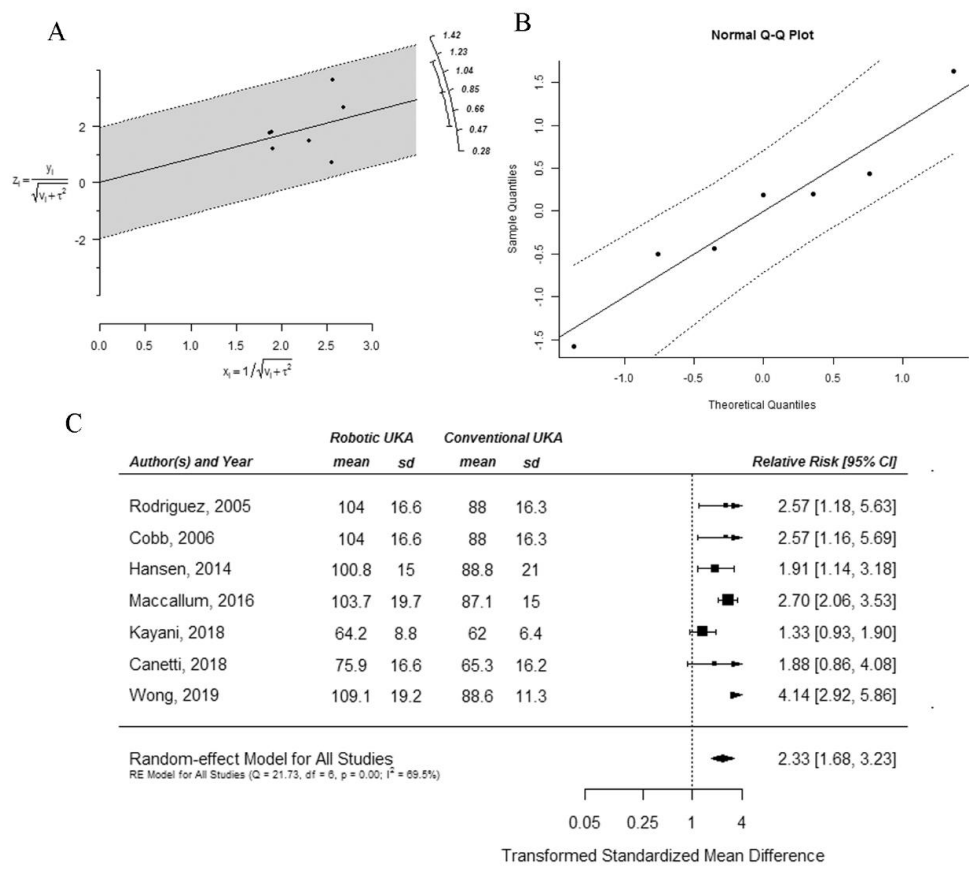

Supplement: bmjopen-2020-044778supp001_data_supplement.pdf [file bmjopen-2020-044778supp001_data_supplement.pdf]
